# Supplementary material for: An Innovative Immune Score-Based Prognostic Nomogram for Patients with Cervical Cancer
Source: Biomed Res Int. 2020 Nov 7;2020:8882576. doi: 10.1155/2020/8882576 (PMC7669339; doi:10.1155/2020/8882576)
Supplement: Supplementary Materials — Supplementary Table 1: the detailed clinical data for each patient. Supplementary Table 2: the immune scores of each patient based on the ESTIMATE algorithm. Supplementary Table 3: the main clinical characteristics and follow-up information of patients with cervical cancer. Supplementary Table 4: results of univariate Cox regression analyses. Supplementary Table 5: results of multivariate Cox regression analyses. [file 8882576.f1.zip]

Archive with 5 entries (5 files):
- Supplementary Table 1.txt
- Supplementary Table 2.txt
- Supplementary Table 3.txt
- Supplementary Table 4.txt
- Supplementary Table 5.txt
