# Supplementary material for: An Innovative Immune Score-Based Prognostic Nomogram for Patients with Cervical Cancer
Source: Biomed Res Int. 2020 Nov 7;2020:8882576. doi: 10.1155/2020/8882576 (PMC7669339; doi:10.1155/2020/8882576)
Supplement: Supplementary Materials — Supplementary Table 1: the detailed clinical data for each patient. Supplementary Table 2: the immune scores of each patient based on the ESTIMATE algorithm. Supplementary Table 3: the main clinical characteristics and follow-up information of patients with cervical cancer. Supplementary Table 4: results of univariate Cox regression analyses. Supplementary Table 5: results of multivariate Cox regression analyses. [file 8882576.f1.zip › Supplementary Table 1.txt]

#Other Patient ID	Patient Identifier	Form completion date	Tissue Prospective Collection Indicator	Tissue Retrospective Collection Indicator	Sex	Menopause Status	Patient Height	Patient Weight	Race Category	Ethnicity Category	Patient's Vital Status	History hormonal contraceptives use	Total number of pregnancies	Number of successful pregnancies which resulted in at least 1 live birth	Patient Death Reason	Patient pregnancy spontaneous abortion count	Cause of death other	Neoadjuvant Therapy Type Administered Prior To Resection Text	Patient pregnancy therapeutic abortion count	Person Neoplasm Status	Ectopic pregnancy count	Pregnancy stillbirth count	Karnofsky Performance Score	Pregnant at diagnosis	Patient Smoking History Category	Started Smoking Year	Stopped Smoking Year	Patient history immune system and related disorders name	Person Cigarette Smoking History Pack Year Value	Patient history immune system and related disorders text	Performance Status	HIV Status	Performance Status Assessment Timepoint Category	Performance status other timing	Primary Therapy Outcome Success Type	Diagnosis Age	Prior Cancer Diagnosis Occurence	Prior immunologic disease type	Prior immunologic disease other	Prior immunosuppressive therapy type	Prior infectious disease other	Prior infectious disease	Prior immunosuppressive therapy other	Neoplasm Histologic Type Name	Keratinizing squamous cell carcinoma present indicator	Neoplasm Histologic Grade	Year Cancer Initial Diagnosis	First Pathologic Diagnosis Biospecimen Acquisition Method Type	First Pathologic Diagnosis Biospecimen Acquisition Other Method Type
#Legacy DMP patient identifier (DMPnnnn)	Identifier to uniquely specify a patient.	Form completion date	Text indicator for the time frame of tissue procurement, indicating that the tissue was procured in parallel to the project.	Text indicator for the time frame of tissue procurement, indicating that the tissue was obtained and stored prior to the initiation of the project.	Sex	Text term to signify the status of a woman's menopause, the permanent cessation of menses, usually defined by 6 to 12 months of amenorrhea.	Height in centimeters.	Weight measured in kilograms.	The text for reporting information about race.	The text for reporting information about ethnicity.	The survival state of the person.	History hormonal contraceptives use	Total number of pregnancies	Number of successful pregnancies which resulted in at least 1 live birth	Text term to identify the cause of death for a patient.	Patient pregnancy spontaneous abortion count	Death cause text	Text term to describe the patient's history of neoadjuvant treatment and the kind of treament given prior to resection of the tumor.	Patient pregnancy therapeutic abortion count	The state or condition of an individual's neoplasm at a particular point in time.	Ectopic pregnancy count	Pregnancy stillbirth count	Score from the Karnofsky Performance status scale, representing the functional capabilities of a person.	Pregnant at diagnosis	Category describing current smoking status and smoking history as self-reported by a patient.	The year in which the participant began smoking.	The year in which the participant quit smoking.	Patient history immune system and related disorders name	Numeric computed value to represent lifetime tobacco exposure defined as number of cigarettes smoked per day x number of years smoked divided by 20.	Patient history immune system and related disorders text	The functional level of the patient based on the Zubrod performance scale.	HIV Status	A timepoint in reference to a patient's therapy in which a performance status assessment is conducted.	Performance status assessment timepoint category other text	Text term for the measure of success of outcome after primary treatment (surgery and adjuvant therapies).	Age at which a condition or disease was first diagnosed.	Text term to describe the patient's history of prior cancer diagnosis and the spatial location of any previous cancer occurrence.	Prior immunologic disease type	Prior immunologic disease other	Prior immunosuppressive therapy type	Prior infectious disease other	Prior infectious disease	Prior immunosuppressive therapy other	Text term for the structural pattern of cancer cells used to define a microscopic diagnosis.	Keratinizing squamous cell carcinoma present indicator	Numeric value to express the degree of abnormality of cancer cells, a measure of differentiation and aggressiveness.	Numeric value to represent the year of an individual's initial pathologic diagnosis of cancer.	Text name of the procedure to secure the tissue used for the original pathologic diagnosis.	Text to describe a method used to secure tissue for an original pathologic diagnosis that is different from other identified methods.
#STRING	STRING	STRING	STRING	STRING	STRING	STRING	NUMBER	NUMBER	STRING	STRING	STRING	STRING	NUMBER	NUMBER	STRING	NUMBER	STRING	STRING	NUMBER	STRING	NUMBER	NUMBER	NUMBER	STRING	STRING	NUMBER	NUMBER	STRING	NUMBER	STRING	NUMBER	STRING	STRING	STRING	STRING	NUMBER	STRING	STRING	STRING	STRING	STRING	STRING	STRING	STRING	STRING	STRING	NUMBER	STRING	STRING
#1	1	1	1	1	1	1	1	1	1	1	1	1	1	1	1	1	1	1	1	1	1	1	1	1	1	1	1	1	1	1	1	1	1	1	1	1	1	1	1	1	1	1	1	1	1	1	1	1	1
OTHER_PATIENT_ID	PATIENT_ID	FORM_COMPLETION_DATE	PROSPECTIVE_COLLECTION	RETROSPECTIVE_COLLECTION	SEX	MENOPAUSE_STATUS	HEIGHT	WEIGHT	RACE	ETHNICITY	VITAL_STATUS	HISTORY_HORMONAL_CONTRACEPTIVES_USE	PREGNANCIES_COUNT_TOTAL	PREGNANCIES_COUNT_LIVE_BIRTH	PATIENT_DEATH_REASON	PREGNANCIES_COUNT_MISCARRIAGE	CAUSE_OF_DEATH_OTHER	HISTORY_NEOADJUVANT_TRTYN	PREGNANCIES_COUNT_INDUCED_ABORTION	TUMOR_STATUS	PREGNANCIES_COUNT_ECTOPIC	PREGNANCIES_COUNT_STILLBIRTH	KARNOFSKY_PERFORMANCE_SCORE	PREGNANT_AT_DIAGNOSIS	TOBACCO_SMOKING_HISTORY_INDICATOR	SMOKING_YEAR_STARTED	SMOKING_YEAR_STOPPED	HISTORY_IMMUNOSUPPRESSIVE_DISEASE	SMOKING_PACK_YEARS	OTHER_IMMUNOSUPPRESSIVE_DISEASE	ECOG_SCORE	HIV_STATUS	PERFORMANCE_STATUS_TIMING	PERFORMANCE_STATUS_OTHER_TIMING	TREATMENT_OUTCOME_FIRST_COURSE	AGE	HISTORY_OTHER_MALIGNANCY	HISTORY_IMMUNOLOGICAL_DISEASE	HISTORY_IMMUNOLOGICAL_DISEASE_OTHER	HISTORY_IMMUNOSUPPRESIVE_DX	HISTORY_IMMUNOSUPPRESSIVE_TX_OTHER	HISTORY_RELEVANT_INFECTIOUS_DX	HISTORY_IMMUNOSUPPRESIVE_DX_OTHER	HISTOLOGICAL_DIAGNOSIS	KERATINIZATION_SQUAMOUS_CELL	GRADE	INITIAL_PATHOLOGIC_DX_YEAR	METHOD_OF_INITIAL_SAMPLE_PROCUREMENT	METHOD_OF_INITIAL_SAMPLE_PROCUREMENT_OTHER
5AEAC31A-176A-4F93-A376-A93A670821BB	TCGA-2W-A8YY	5/15/14	YES	NO	Female	Pre (<6 months since LMP AND no prior bilateral ovariectomy AND not on estrogen replacement)	160	42	WHITE	NOT HISPANIC OR LATINO	Alive	Former User	1	1	[Not Available]	0	[Not Available]	No	0	TUMOR FREE	0	0	[Not Available]	NO	4	[Not Available]	2000	[Not Evaluated]	[Not Available]	[Not Available]	1	[Not Available]	Post-Adjuvant Therapy	[Not Applicable]	Complete Remission/Response	51	No	[Not Available]	[Not Available]	[Not Available]	[Not Available]	[Not Available]	[Not Available]	Adenosquamous	Non-keratinizing squamous cell carcinoma	G3	2013	Biopsy (cervical / CT-guided / Other)	[Not Applicable]
53EAC147-7EB8-4C54-A982-5E058D6749F8	TCGA-4J-AA1J	11/13/14	YES	NO	Female	Pre (<6 months since LMP AND no prior bilateral ovariectomy AND not on estrogen replacement)	165	48	WHITE	NOT HISPANIC OR LATINO	Alive	Never Used	4	4	[Not Available]	0	[Not Available]	No	0	TUMOR FREE	0	0	[Not Available]	YES	1	[Not Available]	[Not Available]	[Not Available]	[Not Available]	[Not Available]	0	[Not Available]	Post-Adjuvant Therapy	[Not Applicable]	Complete Remission/Response	31	No	[Not Available]	[Not Available]	[Not Available]	[Not Available]	[Not Available]	[Not Available]	Cervical Squamous Cell Carcinoma	Non-keratinizing squamous cell carcinoma	G3	2013	Cytology (e.g. Peritoneal or pleural fluid)	[Not Applicable]
39a3120c-0889-4a10-816a-e07528a35f7a	TCGA-BI-A0VR	2004/1/11	NO	YES	Female	Post (prior bilateral ovariectomy OR >12 mo since LMP with no prior hysterectomy)	[Not Available]	[Not Available]	WHITE	NOT HISPANIC OR LATINO	Alive	[Not Available]	6	0	[Not Available]	2	[Not Available]	No	[Not Available]	TUMOR FREE	1	3	[Not Available]	NO	4	22	1995	[Not Available]	20	[Not Available]	[Not Available]	[Not Available]	[Not Available]	[Not Applicable]	[Not Available]	53	No	[Not Available]	[Not Available]	[Not Available]	[Not Available]	[Not Available]	[Not Available]	Cervical Squamous Cell Carcinoma	Non-keratinizing squamous cell carcinoma	G3	2006	Cytology (e.g. Peritoneal or pleural fluid)	[Not Applicable]
3923a64a-f8d7-4e3e-9218-cee642da21db	TCGA-BI-A0VS	2004/5/11	NO	YES	Female	Pre (<6 months since LMP AND no prior bilateral ovariectomy AND not on estrogen replacement)	[Not Available]	[Not Available]	WHITE	NOT HISPANIC OR LATINO	Alive	[Not Available]	[Not Available]	[Not Available]	[Not Available]	0	[Not Available]	No	0	TUMOR FREE	1	0	[Not Available]	NO	2	[Not Available]	[Not Available]	[Not Available]	[Not Available]	[Not Available]	[Not Available]	[Not Available]	[Not Available]	[Not Applicable]	[Not Available]	48	No	[Not Available]	[Not Available]	[Not Available]	[Not Available]	[Not Available]	[Not Available]	Cervical Squamous Cell Carcinoma	Non-keratinizing squamous cell carcinoma	G3	2007	Cytology (e.g. Peritoneal or pleural fluid)	[Not Applicable]
f40468de-3b86-4922-9951-f8ae28da6af0	TCGA-BI-A20A	2010/5/11	NO	YES	Female	[Not Available]	167	59	WHITE	NOT HISPANIC OR LATINO	Alive	[Not Available]	2	2	[Not Available]	[Not Available]	[Not Available]	No	[Not Available]	TUMOR FREE	[Not Available]	[Not Available]	[Not Available]	[Not Available]	[Not Available]	[Not Available]	[Not Available]	[Not Available]	[Not Available]	[Not Available]	[Not Available]	[Not Available]	[Not Available]	[Not Applicable]	[Not Available]	49	No	[Not Available]	[Not Available]	[Not Available]	[Not Available]	[Not Available]	[Not Available]	Cervical Squamous Cell Carcinoma	Non-keratinizing squamous cell carcinoma	G3	2010	Cone Biopsy / LEEP	[Not Applicable]
14c65927-b9dd-4ef6-9917-db7bc431ff2f	TCGA-C5-A0TN	8/23/11	NO	YES	Female	Pre (<6 months since LMP AND no prior bilateral ovariectomy AND not on estrogen replacement)	[Not Available]	55	BLACK OR AFRICAN AMERICAN	NOT HISPANIC OR LATINO	Dead	[Not Available]	4	1	[Not Available]	[Not Available]	[Not Available]	No	3	WITH TUMOR	[Not Available]	[Not Available]	[Not Available]	[Not Available]	1	[Not Available]	[Not Available]	[Not Available]	[Not Available]	[Not Available]	[Not Available]	[Not Available]	[Not Available]	[Not Applicable]	[Not Available]	21	No	[Not Available]	[Not Available]	[Not Available]	[Not Available]	[Not Available]	[Not Available]	Cervical Squamous Cell Carcinoma	Keratinizing squamous cell carcinoma	G3	1997	Other method, specify:	surgery
2b6d2c15-8bcc-41ab-84d6-601442f4378b	TCGA-C5-A1BE	2009/12/11	NO	YES	Female	Post (prior bilateral ovariectomy OR >12 mo since LMP with no prior hysterectomy)	149	76	WHITE	[Not Available]	Dead	[Not Available]	6	4	[Not Available]	1	[Not Available]	No	1	WITH TUMOR	0	0	[Not Available]	NO	3	[Not Available]	[Not Available]	[Not Available]	[Not Available]	[Not Available]	[Not Available]	[Not Available]	[Not Available]	[Not Applicable]	[Not Available]	64	No	[Not Available]	[Not Available]	[Not Available]	[Not Available]	[Not Available]	[Not Available]	Cervical Squamous Cell Carcinoma	Non-keratinizing squamous cell carcinoma	G2	2000	Cone Biopsy / LEEP	[Not Applicable]
262311a0-7a10-4934-8fba-11ee581ad738	TCGA-C5-A1BF	2009/12/11	NO	YES	Female	[Not Available]	[Not Available]	76	WHITE	[Not Available]	Dead	[Not Available]	5	4	[Not Available]	1	[Not Available]	No	[Not Available]	WITH TUMOR	[Not Available]	[Not Available]	[Not Available]	NO	2	[Not Available]	[Not Available]	[Not Available]	30	[Not Available]	[Not Available]	[Not Available]	[Not Available]	[Not Applicable]	[Not Available]	46	No	[Not Available]	[Not Available]	[Not Available]	[Not Available]	[Not Available]	[Not Available]	Cervical Squamous Cell Carcinoma	Keratinizing squamous cell carcinoma	G1	1997	Biopsy (cervical / CT-guided / Other)	[Not Applicable]
91310434-2a99-4e1d-81e6-3d58d097089f	TCGA-C5-A1BI	2009/12/11	NO	YES	Female	Pre (<6 months since LMP AND no prior bilateral ovariectomy AND not on estrogen replacement)	157	59	WHITE	NOT HISPANIC OR LATINO	Alive	Former User	3	2	[Not Available]	0	[Not Available]	No	1	TUMOR FREE	0	0	[Not Available]	NO	2	16	[Not Available]	[Not Available]	15	[Not Available]	[Not Available]	[Not Available]	[Not Available]	[Not Applicable]	[Not Available]	31	No	[Not Available]	[Not Available]	[Not Available]	[Not Available]	[Not Available]	[Not Available]	Cervical Squamous Cell Carcinoma	[Not Available]	G2	2001	Other method, specify:	ECC
7941d1c7-5319-4e8d-a15f-60b61cb68a9b	TCGA-C5-A1BJ	9/13/11	NO	YES	Female	Pre (<6 months since LMP AND no prior bilateral ovariectomy AND not on estrogen replacement)	169	49	WHITE	[Not Available]	Alive	[Not Available]	0	0	[Not Available]	0	[Not Available]	No	0	TUMOR FREE	0	0	[Not Available]	NO	4	24	1997	[Not Available]	10	[Not Available]	[Not Available]	[Not Available]	[Not Available]	[Not Applicable]	[Not Available]	34	No	[Not Available]	[Not Available]	[Not Available]	[Not Available]	[Not Available]	[Not Available]	Cervical Squamous Cell Carcinoma	[Not Available]	G2	1997	Biopsy (cervical / CT-guided / Other)	[Not Applicable]
7df6c297-f2d6-43ef-973b-1f95676b0cc4	TCGA-C5-A1BK	8/23/11	NO	YES	Female	Pre (<6 months since LMP AND no prior bilateral ovariectomy AND not on estrogen replacement)	151	82	BLACK OR AFRICAN AMERICAN	NOT HISPANIC OR LATINO	Alive	[Not Available]	4	4	[Not Available]	0	[Not Available]	No	0	TUMOR FREE	0	0	[Not Available]	NO	1	[Not Available]	[Not Available]	[Not Available]	[Not Available]	[Not Available]	[Not Available]	[Not Available]	[Not Available]	[Not Applicable]	[Not Available]	36	No	[Not Available]	[Not Available]	[Not Available]	[Not Available]	[Not Available]	[Not Available]	Cervical Squamous Cell Carcinoma	Keratinizing squamous cell carcinoma	G2	1994	Other method, specify:	ECC
03c3fe57-ae85-4e45-9657-c3182ab5e124	TCGA-C5-A1BL	1/24/12	NO	YES	Female	Pre (<6 months since LMP AND no prior bilateral ovariectomy AND not on estrogen replacement)	168	78	WHITE	NOT HISPANIC OR LATINO	Alive	Never Used	1	1	[Not Available]	0	[Not Available]	No	0	TUMOR FREE	0	0	[Not Available]	NO	4	16	1988	[Not Available]	12	[Not Available]	1	[Not Available]	Preoperative	[Not Applicable]	[Not Available]	32	No	[Not Available]	[Not Available]	[Not Available]	[Not Available]	[Not Available]	[Not Available]	Cervical Squamous Cell Carcinoma	Non-keratinizing squamous cell carcinoma	G2	1994	Biopsy (cervical / CT-guided / Other)	[Not Applicable]
7fb8e7be-4118-41f8-b785-5cbb0afdb8b7	TCGA-C5-A1BM	9/21/11	NO	YES	Female	Post (prior bilateral ovariectomy OR >12 mo since LMP with no prior hysterectomy)	171	56	BLACK OR AFRICAN AMERICAN	[Not Available]	Dead	[Not Available]	3	2	[Not Available]	1	[Not Available]	No	0	TUMOR FREE	0	0	[Not Available]	NO	4	[Not Available]	[Not Available]	[Not Available]	[Not Available]	[Not Available]	[Not Available]	[Not Available]	[Not Available]	[Not Applicable]	[Not Available]	78	No	[Not Available]	[Not Available]	[Not Available]	[Not Available]	[Not Available]	[Not Available]	Cervical Squamous Cell Carcinoma	Non-keratinizing squamous cell carcinoma	G2	1997	Biopsy (cervical / CT-guided / Other)	[Not Applicable]
8a4da4f0-30f2-497e-8a7c-988fd6b813cb	TCGA-C5-A1BN	9/21/11	NO	YES	Female	Pre (<6 months since LMP AND no prior bilateral ovariectomy AND not on estrogen replacement)	163	68	WHITE	NOT HISPANIC OR LATINO	Dead	Never Used	2	2	[Not Available]	0	[Not Available]	No	0	WITH TUMOR	0	0	[Not Available]	NO	2	15	[Not Available]	[Not Available]	11	[Not Available]	[Not Available]	[Not Available]	[Not Available]	[Not Applicable]	[Not Available]	26	No	[Not Available]	[Not Available]	[Not Available]	[Not Available]	[Not Available]	[Not Available]	Cervical Squamous Cell Carcinoma	[Not Available]	G3	2007	Biopsy (cervical / CT-guided / Other)	[Not Applicable]
E77C3F70-08D1-40D3-B038-F09A519423CC	TCGA-C5-A1BQ	2008/7/12	NO	YES	Female	Post (prior bilateral ovariectomy OR >12 mo since LMP with no prior hysterectomy)	147	69	WHITE	NOT HISPANIC OR LATINO	Dead	[Not Available]	10	6	Cervical Cancer	3	[Not Available]	No	0	TUMOR FREE	0	1	[Not Available]	NO	4	12	1999	[Not Available]	25	[Not Available]	[Not Available]	[Not Available]	[Not Available]	[Not Applicable]	Partial Remission/Response	65	No	[Not Available]	[Not Available]	[Not Available]	[Not Available]	[Not Available]	[Not Available]	Cervical Squamous Cell Carcinoma	Keratinizing squamous cell carcinoma	G2	2002	Biopsy (cervical / CT-guided / Other)	[Not Applicable]
0fec73a1-8d3a-495b-8008-c52f190f4270	TCGA-C5-A1M5	9/19/11	NO	YES	Female	Indeterminate (neither Pre or Postmenopausal)	[Not Available]	70	WHITE	NOT HISPANIC OR LATINO	Dead	[Not Available]	4	4	[Not Available]	0	[Not Available]	No	0	WITH TUMOR	0	0	[Not Available]	NO	1	[Not Available]	[Not Available]	[Not Available]	[Not Available]	[Not Available]	[Not Available]	[Not Available]	[Not Available]	[Not Applicable]	[Not Available]	53	No	[Not Available]	[Not Available]	[Not Available]	[Not Available]	[Not Available]	[Not Available]	Cervical Squamous Cell Carcinoma	Keratinizing squamous cell carcinoma	G2	1996	Biopsy (cervical / CT-guided / Other)	[Not Applicable]
825a6fbb-aede-436f-800b-c7f096da0a77	TCGA-C5-A1M6	9/21/11	NO	YES	Female	Post (prior bilateral ovariectomy OR >12 mo since LMP with no prior hysterectomy)	165	77	WHITE	[Not Available]	Dead	Former User	1	1	[Not Available]	0	[Not Available]	No	0	WITH TUMOR	0	0	[Not Available]	NO	1	[Not Available]	[Not Available]	[Not Available]	[Not Available]	[Not Available]	[Not Available]	[Not Available]	[Not Available]	[Not Applicable]	[Not Available]	55	No	[Not Available]	[Not Available]	[Not Available]	[Not Available]	[Not Available]	[Not Available]	Cervical Squamous Cell Carcinoma	[Not Available]	G3	1998	Biopsy (cervical / CT-guided / Other)	[Not Applicable]
e8e16aaf-3621-4ce8-b02a-7893dd656e4d	TCGA-C5-A1M7	1/24/12	NO	YES	Female	Pre (<6 months since LMP AND no prior bilateral ovariectomy AND not on estrogen replacement)	165	69	WHITE	NOT HISPANIC OR LATINO	Alive	Never Used	5	4	[Not Available]	0	[Not Available]	No	0	TUMOR FREE	0	1	[Not Available]	NO	2	16	[Not Available]	[Not Available]	26	[Not Available]	1	[Not Available]	Preoperative	[Not Applicable]	[Not Available]	37	No	[Not Available]	[Not Available]	[Not Available]	[Not Available]	[Not Available]	[Not Available]	Cervical Squamous Cell Carcinoma	Non-keratinizing squamous cell carcinoma	G2	1999	Other method, specify:	Radical Hysterectomy
110cd100-5730-4873-9fab-2ae6c8732062	TCGA-C5-A1M8	9/19/11	NO	YES	Female	Indeterminate (neither Pre or Postmenopausal)	163	75	WHITE	NOT HISPANIC OR LATINO	Alive	Never Used	1	0	[Not Available]	0	[Not Available]	No	1	TUMOR FREE	0	0	[Not Available]	NO	1	[Not Available]	[Not Available]	[Not Available]	[Not Available]	[Not Available]	[Not Available]	[Not Available]	[Not Available]	[Not Applicable]	[Not Available]	43	No	[Not Available]	[Not Available]	[Not Available]	[Not Available]	[Not Available]	[Not Available]	Cervical Squamous Cell Carcinoma	[Not Available]	G2	2001	Cone Biopsy / LEEP	[Not Applicable]
a3be445a-a592-4073-815b-47ae41f9c4a0	TCGA-C5-A1M9	9/19/11	NO	YES	Female	Pre (<6 months since LMP AND no prior bilateral ovariectomy AND not on estrogen replacement)	155	49	WHITE	NOT HISPANIC OR LATINO	Dead	Former User	1	0	[Not Available]	0	[Not Available]	No	1	WITH TUMOR	0	0	[Not Available]	NO	1	[Not Available]	[Not Available]	[Not Available]	[Not Available]	[Not Available]	[Not Available]	[Not Available]	[Not Available]	[Not Applicable]	[Not Available]	46	No	[Not Available]	[Not Available]	[Not Available]	[Not Available]	[Not Available]	[Not Available]	Endocervical Type of Adenocarcinoma	[Not Available]	G3	2002	Biopsy (cervical / CT-guided / Other)	[Not Applicable]
a0598331-79e1-418d-b50c-fd945b843506	TCGA-C5-A1ME	9/19/11	NO	YES	Female	Pre (<6 months since LMP AND no prior bilateral ovariectomy AND not on estrogen replacement)	165	69	WHITE	NOT HISPANIC OR LATINO	Alive	Former User	1	1	[Not Available]	0	[Not Available]	No	0	TUMOR FREE	0	0	[Not Available]	NO	4	18	2003	[Not Available]	22	[Not Available]	[Not Available]	[Not Available]	[Not Available]	[Not Applicable]	[Not Available]	40	No	[Not Available]	[Not Available]	[Not Available]	[Not Available]	[Not Available]	[Not Available]	Endocervical Type of Adenocarcinoma	[Not Available]	G1	2003	Biopsy (cervical / CT-guided / Other)	[Not Applicable]
4f514ed4-3be6-44bc-a531-210027846459	TCGA-C5-A1MF	1/25/12	NO	YES	Female	Pre (<6 months since LMP AND no prior bilateral ovariectomy AND not on estrogen replacement)	163	70	WHITE	NOT HISPANIC OR LATINO	Alive	Former User	2	2	[Not Available]	0	[Not Available]	No	0	TUMOR FREE	0	0	[Not Available]	NO	4	20	1995	[Not Available]	10	[Not Available]	1	[Not Available]	Preoperative	[Not Applicable]	[Not Available]	49	No	[Not Available]	[Not Available]	[Not Available]	[Not Available]	[Not Available]	[Not Available]	Cervical Squamous Cell Carcinoma	Keratinizing squamous cell carcinoma	G2	2004	Biopsy (cervical / CT-guided / Other)	[Not Applicable]
3143822c-66c4-4b58-8d29-e92d065ff049	TCGA-C5-A1MH	9/19/11	NO	YES	Female	Post (prior bilateral ovariectomy OR >12 mo since LMP with no prior hysterectomy)	[Not Available]	[Not Available]	WHITE	NOT HISPANIC OR LATINO	Dead	[Not Available]	2	2	[Not Available]	0	[Not Available]	No	0	WITH TUMOR	0	0	[Not Available]	NO	3	[Not Available]	2003	[Not Available]	15	[Not Available]	[Not Available]	[Not Available]	[Not Available]	[Not Applicable]	[Not Available]	71	No	[Not Available]	[Not Available]	[Not Available]	[Not Available]	[Not Available]	[Not Available]	Cervical Squamous Cell Carcinoma	Keratinizing squamous cell carcinoma	G3	2004	Biopsy (cervical / CT-guided / Other)	[Not Applicable]
941f75a1-fea4-4539-ba69-60bb11608f6d	TCGA-C5-A1MI	9/19/11	NO	YES	Female	Peri (6-12 months since last menstrual period)	[Not Available]	77	WHITE	NOT HISPANIC OR LATINO	Dead	[Not Available]	7	2	[Not Available]	2	[Not Available]	No	2	WITH TUMOR	1	0	[Not Available]	NO	2	15	[Not Available]	Other, specify	35	Herpes	[Not Available]	[Not Available]	[Not Available]	[Not Applicable]	[Not Available]	50	No	[Not Available]	[Not Available]	[Not Available]	[Not Available]	[Not Available]	[Not Available]	Cervical Squamous Cell Carcinoma	[Not Available]	G2	2004	Biopsy (cervical / CT-guided / Other)	[Not Applicable]
23f011e2-c025-4494-8016-2140cc8d4bce	TCGA-C5-A1MJ	9/21/11	NO	YES	Female	Post (prior bilateral ovariectomy OR >12 mo since LMP with no prior hysterectomy)	165	75	WHITE	[Not Available]	Dead	[Not Available]	6	3	[Not Available]	0	[Not Available]	No	2	TUMOR FREE	1	0	[Not Available]	NO	1	[Not Available]	[Not Available]	[Not Available]	[Not Available]	[Not Available]	[Not Available]	[Not Available]	[Not Available]	[Not Applicable]	[Not Available]	61	No	[Not Available]	[Not Available]	[Not Available]	[Not Available]	[Not Available]	[Not Available]	Endocervical Type of Adenocarcinoma	[Not Available]	G2	2005	Biopsy (cervical / CT-guided / Other)	[Not Applicable]
b726f18b-b996-4978-9f27-b3a540e06270	TCGA-C5-A1MK	10/21/11	NO	YES	Female	Post (prior bilateral ovariectomy OR >12 mo since LMP with no prior hysterectomy)	155	63	WHITE	NOT HISPANIC OR LATINO	Dead	[Not Available]	5	2	[Not Available]	0	[Not Available]	No	2	WITH TUMOR	0	1	[Not Available]	NO	1	[Not Available]	[Not Available]	[Not Available]	[Not Available]	[Not Available]	[Not Available]	[Not Available]	[Not Available]	[Not Applicable]	[Not Available]	79	No	[Not Available]	[Not Available]	[Not Available]	[Not Available]	[Not Available]	[Not Available]	Cervical Squamous Cell Carcinoma	Keratinizing squamous cell carcinoma	G3	2005	Biopsy (cervical / CT-guided / Other)	[Not Applicable]
374f614a-bcd1-4283-ac6f-fc27ddc79987	TCGA-C5-A1ML	10/21/11	NO	YES	Female	Post (prior bilateral ovariectomy OR >12 mo since LMP with no prior hysterectomy)	[Not Available]	120	WHITE	[Not Available]	Dead	[Not Available]	2	2	[Not Available]	0	[Not Available]	No	0	WITH TUMOR	0	0	[Not Available]	NO	2	[Not Available]	[Not Available]	[Not Available]	37	[Not Available]	[Not Available]	[Not Available]	[Not Available]	[Not Applicable]	[Not Available]	49	No	[Not Available]	[Not Available]	[Not Available]	[Not Available]	[Not Available]	[Not Available]	Cervical Squamous Cell Carcinoma	[Not Available]	G3	2005	Biopsy (cervical / CT-guided / Other)	[Not Applicable]
287ce10e-31c8-4b10-9858-6e45451dfbe4	TCGA-C5-A1MN	10/21/11	NO	YES	Female	Pre (<6 months since LMP AND no prior bilateral ovariectomy AND not on estrogen replacement)	165	64	WHITE	NOT HISPANIC OR LATINO	Dead	Former User	0	0	[Not Available]	0	[Not Available]	No	0	TUMOR FREE	0	0	[Not Available]	NO	2	[Not Available]	[Not Available]	[Not Available]	25	[Not Available]	1	[Not Available]	Post-Adjuvant Therapy	[Not Applicable]	[Not Available]	42	No	[Not Available]	[Not Available]	[Not Available]	[Not Available]	[Not Available]	[Not Available]	Cervical Squamous Cell Carcinoma	Keratinizing squamous cell carcinoma	G2	2007	Biopsy (cervical / CT-guided / Other)	[Not Applicable]
08a52bcf-d2e9-497b-938a-4660c332e914	TCGA-C5-A1MP	10/21/11	NO	YES	Female	Pre (<6 months since LMP AND no prior bilateral ovariectomy AND not on estrogen replacement)	[Not Available]	[Not Available]	BLACK OR AFRICAN AMERICAN	NOT HISPANIC OR LATINO	Alive	[Not Available]	3	3	[Not Available]	0	[Not Available]	No	0	TUMOR FREE	0	0	[Not Available]	NO	1	[Not Available]	[Not Available]	[Not Available]	[Not Available]	[Not Available]	[Not Available]	[Not Available]	[Not Available]	[Not Applicable]	[Not Available]	34	No	[Not Available]	[Not Available]	[Not Available]	[Not Available]	[Not Available]	[Not Available]	Cervical Squamous Cell Carcinoma	[Not Available]	G3	2009	Biopsy (cervical / CT-guided / Other)	[Not Applicable]
eb59cf69-1997-41b9-bf69-69ad7da292a1	TCGA-C5-A1MQ	10/21/11	NO	YES	Female	[Not Available]	175	116	WHITE	NOT HISPANIC OR LATINO	Alive	[Not Available]	4	2	[Not Available]	2	[Not Available]	No	0	TUMOR FREE	0	0	[Not Available]	NO	1	[Not Available]	[Not Available]	[Not Available]	[Not Available]	[Not Available]	[Not Available]	[Not Available]	[Not Available]	[Not Applicable]	[Not Available]	35	No	[Not Available]	[Not Available]	[Not Available]	[Not Available]	[Not Available]	[Not Available]	Cervical Squamous Cell Carcinoma	[Not Available]	G2	2009	Biopsy (cervical / CT-guided / Other)	[Not Applicable]
185E1520-92EE-4AF5-AF15-FBEEFB352C99	TCGA-C5-A2LS	2001/3/14	NO	YES	Female	[Not Available]	173	92	WHITE	NOT HISPANIC OR LATINO	Alive	[Not Available]	3	2	[Not Available]	1	[Not Available]	No	0	TUMOR FREE	0	0	[Not Available]	NO	2	17	[Not Available]	[Not Available]	11	[Not Available]	[Not Available]	[Not Available]	[Not Available]	[Not Applicable]	Complete Remission/Response	37	No	[Not Available]	[Not Available]	[Not Available]	[Not Available]	[Not Available]	[Not Available]	Endocervical Adenocarcinoma of the Usual Type	[Not Available]	G1	2005	Biopsy (cervical / CT-guided / Other)	[Not Applicable]
FB66B7F5-22CA-4D4D-97C2-30E6EDFFF781	TCGA-C5-A2LT	1/24/12	NO	YES	Female	Pre (<6 months since LMP AND no prior bilateral ovariectomy AND not on estrogen replacement)	163	59	WHITE	NOT HISPANIC OR LATINO	Alive	Current User	2	2	[Not Available]	0	[Not Available]	No	0	TUMOR FREE	0	0	[Not Available]	NO	2	20	[Not Available]	[Not Available]	19	[Not Available]	1	[Not Available]	Preoperative	[Not Applicable]	[Not Available]	38	No	[Not Available]	[Not Available]	[Not Available]	[Not Available]	[Not Available]	[Not Available]	Cervical Squamous Cell Carcinoma	Keratinizing squamous cell carcinoma	G3	2001	Biopsy (cervical / CT-guided / Other)	[Not Applicable]
00BCA18C-B3D4-45A3-8F19-034CC40449A4	TCGA-C5-A2LV	2002/8/12	NO	YES	Female	Pre (<6 months since LMP AND no prior bilateral ovariectomy AND not on estrogen replacement)	165	84	BLACK OR AFRICAN AMERICAN	NOT HISPANIC OR LATINO	Alive	Never Used	6	3	[Not Available]	1	[Not Available]	No	2	TUMOR FREE	0	0	[Not Available]	NO	2	20	[Not Available]	[Not Available]	16	[Not Available]	1	[Not Available]	Preoperative	[Not Applicable]	[Not Available]	36	No	[Not Available]	[Not Available]	[Not Available]	[Not Available]	[Not Available]	[Not Available]	Cervical Squamous Cell Carcinoma	Non-keratinizing squamous cell carcinoma	G3	2003	Biopsy (cervical / CT-guided / Other)	[Not Applicable]
B82F4C6D-530F-4B0E-8F33-995633CB254A	TCGA-C5-A2LX	2002/8/12	NO	YES	Female	Post (prior bilateral ovariectomy OR >12 mo since LMP with no prior hysterectomy)	165	65	WHITE	NOT HISPANIC OR LATINO	Alive	Former User	4	4	[Not Available]	0	[Not Available]	No	0	TUMOR FREE	0	0	[Not Available]	NO	2	18	[Not Available]	[Not Available]	35	[Not Available]	1	[Not Available]	Pre-Adjuvant Therapy	[Not Applicable]	[Not Available]	54	No	[Not Available]	[Not Available]	[Not Available]	[Not Available]	[Not Available]	[Not Available]	Cervical Squamous Cell Carcinoma	Keratinizing squamous cell carcinoma	G2	2007	Biopsy (cervical / CT-guided / Other)	[Not Applicable]
E733F289-A0EC-478C-AAD9-1378AD26DDFA	TCGA-C5-A2LY	1/25/12	NO	YES	Female	Pre (<6 months since LMP AND no prior bilateral ovariectomy AND not on estrogen replacement)	160	88	WHITE	NOT HISPANIC OR LATINO	Alive	Former User	1	1	[Not Available]	0	[Not Available]	No	0	TUMOR FREE	0	0	[Not Available]	NO	1	[Not Available]	[Not Available]	[Not Available]	[Not Available]	[Not Available]	1	[Not Available]	Preoperative	[Not Applicable]	[Not Available]	30	No	[Not Available]	[Not Available]	[Not Available]	[Not Available]	[Not Available]	[Not Available]	Cervical Squamous Cell Carcinoma	Non-keratinizing squamous cell carcinoma	G2	2002	Biopsy (cervical / CT-guided / Other)	[Not Applicable]
BE8FA67D-C2D3-4FFF-82FE-A46BA1FA8DF0	TCGA-C5-A2LZ	2007/10/12	NO	YES	Female	Post (prior bilateral ovariectomy OR >12 mo since LMP with no prior hysterectomy)	163	85	WHITE	NOT HISPANIC OR LATINO	Dead	[Not Available]	5	4	Cervical Cancer	1	[Not Available]	No	0	WITH TUMOR	0	0	[Not Available]	NO	2	15	[Not Available]	[Not Available]	50	[Not Available]	[Not Available]	[Not Available]	[Not Available]	[Not Applicable]	Complete Remission/Response	65	No	[Not Available]	[Not Available]	[Not Available]	[Not Available]	[Not Available]	[Not Available]	Cervical Squamous Cell Carcinoma	Keratinizing squamous cell carcinoma	G2	1998	Biopsy (cervical / CT-guided / Other)	[Not Applicable]
8911C80C-C903-48E4-AF5B-FFEDEF9ABC47	TCGA-C5-A2M1	2002/8/12	NO	YES	Female	Pre (<6 months since LMP AND no prior bilateral ovariectomy AND not on estrogen replacement)	168	76	WHITE	NOT HISPANIC OR LATINO	Alive	Former User	2	2	[Not Available]	0	[Not Available]	No	0	TUMOR FREE	0	0	[Not Available]	NO	1	[Not Available]	[Not Available]	[Not Available]	[Not Available]	[Not Available]	1	[Not Available]	Preoperative	[Not Applicable]	[Not Available]	37	No	[Not Available]	[Not Available]	[Not Available]	[Not Available]	[Not Available]	[Not Available]	Endocervical Type of Adenocarcinoma	[Not Available]	G2	2005	Biopsy (cervical / CT-guided / Other)	[Not Applicable]
77D53D4D-3B07-4C79-86FE-6AC812968F39	TCGA-C5-A2M2	2004/4/12	NO	YES	Female	Post (prior bilateral ovariectomy OR >12 mo since LMP with no prior hysterectomy)	[Not Available]	[Not Available]	WHITE	NOT HISPANIC OR LATINO	Dead	Former User	1	1	[Not Available]	0	[Not Available]	No	0	[Not Available]	0	0	[Not Available]	NO	4	24	2003	[Not Available]	8	[Not Available]	[Not Available]	[Not Available]	[Not Available]	[Not Applicable]	[Not Available]	56	No	[Not Available]	[Not Available]	[Not Available]	[Not Available]	[Not Available]	[Not Available]	Endocervical Type of Adenocarcinoma	[Not Available]	G2	2009	Biopsy (cervical / CT-guided / Other)	[Not Applicable]
12427B02-6E3F-461C-B271-6AB230F628E7	TCGA-C5-A3HD	4/17/12	NO	YES	Female	[Not Available]	170	83	WHITE	NOT HISPANIC OR LATINO	Alive	Former User	2	2	[Not Available]	0	[Not Available]	No	0	TUMOR FREE	0	0	[Not Available]	NO	4	16	1995	[Not Available]	27	[Not Available]	1	[Not Available]	Preoperative	[Not Applicable]	[Not Available]	51	No	[Not Available]	[Not Available]	[Not Available]	[Not Available]	[Not Available]	[Not Available]	Cervical Squamous Cell Carcinoma	[Not Available]	G2	2004	Biopsy (cervical / CT-guided / Other)	[Not Applicable]
BC63DD2A-B8F6-4B30-A8D7-CE193BCD17F1	TCGA-C5-A3HE	2001/3/14	NO	YES	Female	[Not Available]	[Not Available]	[Not Available]	WHITE	NOT HISPANIC OR LATINO	Alive	[Not Available]	1	0	[Not Available]	0	[Not Available]	No	1	[Not Available]	0	0	[Not Available]	[Not Available]	1	[Not Available]	[Not Available]	[Not Available]	[Not Available]	[Not Available]	[Not Available]	[Not Available]	[Not Available]	[Not Applicable]	[Not Available]	44	No	[Not Available]	[Not Available]	[Not Available]	[Not Available]	[Not Available]	[Not Available]	Cervical Squamous Cell Carcinoma	Non-keratinizing squamous cell carcinoma	G3	2006	Biopsy (cervical / CT-guided / Other)	[Not Applicable]
085DF27C-9BC2-425A-9A49-547D692EA028	TCGA-C5-A3HF	4/16/12	NO	YES	Female	Pre (<6 months since LMP AND no prior bilateral ovariectomy AND not on estrogen replacement)	[Not Available]	[Not Available]	WHITE	NOT HISPANIC OR LATINO	Dead	[Not Available]	1	1	[Not Available]	0	[Not Available]	No	0	WITH TUMOR	0	0	[Not Available]	NO	2	16	[Not Available]	[Not Available]	9	[Not Available]	[Not Available]	[Not Available]	[Not Available]	[Not Applicable]	[Not Available]	24	No	[Not Available]	[Not Available]	[Not Available]	[Not Available]	[Not Available]	[Not Available]	Mucinous Adenocarcinoma of Endocervical Type	[Not Available]	G2	1996	Biopsy (cervical / CT-guided / Other)	[Not Applicable]
09329A53-D58D-4480-95D8-32043E40DE6E	TCGA-C5-A3HL	4/17/12	NO	YES	Female	Post (prior bilateral ovariectomy OR >12 mo since LMP with no prior hysterectomy)	[Not Available]	[Not Available]	WHITE	NOT HISPANIC OR LATINO	Alive	Never Used	5	4	[Not Available]	0	[Not Available]	No	1	TUMOR FREE	0	0	[Not Available]	NO	1	[Not Available]	[Not Available]	[Not Available]	[Not Available]	[Not Available]	[Not Available]	[Not Available]	[Not Available]	[Not Applicable]	[Not Available]	76	No	[Not Available]	[Not Available]	[Not Available]	[Not Available]	[Not Available]	[Not Available]	Cervical Squamous Cell Carcinoma	Keratinizing squamous cell carcinoma	G2	2007	Biopsy (cervical / CT-guided / Other)	[Not Applicable]
F2C901D1-2039-4046-89B5-C2D45BCF10C3	TCGA-C5-A7CG	2001/3/14	NO	YES	Female	[Not Available]	169	94	WHITE	NOT HISPANIC OR LATINO	Alive	Never Used	6	5	[Not Available]	0	[Not Available]	No	0	TUMOR FREE	0	1	[Not Available]	[Not Available]	1	[Not Available]	[Not Available]	[Not Available]	[Not Available]	[Not Available]	[Not Available]	[Not Available]	[Not Available]	[Not Applicable]	[Not Available]	55	No	[Not Available]	[Not Available]	[Not Available]	[Not Available]	[Not Available]	[Not Available]	Cervical Squamous Cell Carcinoma	Keratinizing squamous cell carcinoma	G2	1997	Biopsy (cervical / CT-guided / Other)	[Not Applicable]
D626A732-AF64-4DEC-B4BF-3CB761BF4C8D	TCGA-C5-A7CH	2001/3/14	NO	YES	Female	[Not Available]	161	104	WHITE	NOT HISPANIC OR LATINO	Alive	[Not Available]	9	8	[Not Available]	0	[Not Available]	No	1	[Not Available]	0	0	[Not Available]	[Not Available]	1	[Not Available]	[Not Available]	[Not Available]	[Not Available]	[Not Available]	[Not Available]	[Not Available]	[Not Available]	[Not Applicable]	[Not Available]	43	No	[Not Available]	[Not Available]	[Not Available]	[Not Available]	[Not Available]	[Not Available]	Cervical Squamous Cell Carcinoma	Keratinizing squamous cell carcinoma	G2	2001	Biopsy (cervical / CT-guided / Other)	[Not Applicable]
F8F470D2-924F-41DD-92C5-516B0BF68E44	TCGA-C5-A7CJ	2001/3/14	NO	YES	Female	[Not Available]	163	60	WHITE	NOT HISPANIC OR LATINO	Dead	[Not Available]	2	2	[Not Available]	0	[Not Available]	No	0	TUMOR FREE	0	0	[Not Available]	[Not Available]	2	22	[Not Available]	[Not Available]	30	[Not Available]	[Not Available]	[Not Available]	[Not Available]	[Not Applicable]	[Not Available]	42	No	[Not Available]	[Not Available]	[Not Available]	[Not Available]	[Not Available]	[Not Available]	Cervical Squamous Cell Carcinoma	Keratinizing squamous cell carcinoma	G2	2002	Biopsy (cervical / CT-guided / Other)	[Not Applicable]
1C48393E-7DE9-42F6-A6F0-2CBFB8359316	TCGA-C5-A7CK	2001/3/14	NO	YES	Female	[Not Available]	165	55	WHITE	[Not Available]	Dead	[Not Available]	3	3	[Not Available]	0	[Not Available]	No	0	TUMOR FREE	0	0	[Not Available]	[Not Available]	5	[Not Available]	[Not Available]	[Not Available]	40	[Not Available]	[Not Available]	[Not Available]	[Not Available]	[Not Applicable]	[Not Available]	58	No	[Not Available]	[Not Available]	[Not Available]	[Not Available]	[Not Available]	[Not Available]	Cervical Squamous Cell Carcinoma	Keratinizing squamous cell carcinoma	G2	2001	Biopsy (cervical / CT-guided / Other)	[Not Applicable]
BAE2AF5E-484A-44F7-AD6B-66137CDAE300	TCGA-C5-A7CL	2001/3/14	NO	YES	Female	[Not Available]	163	103	WHITE	[Not Available]	Dead	[Not Available]	3	3	Cervical Cancer	0	[Not Available]	No	0	WITH TUMOR	0	0	[Not Available]	[Not Available]	2	29	[Not Available]	[Not Available]	20	[Not Available]	[Not Available]	[Not Available]	[Not Available]	[Not Applicable]	[Not Available]	48	No	[Not Available]	[Not Available]	[Not Available]	[Not Available]	[Not Available]	[Not Available]	Cervical Squamous Cell Carcinoma	Keratinizing squamous cell carcinoma	G2	2002	Biopsy (cervical / CT-guided / Other)	[Not Applicable]
D223FF09-B80B-4368-9D80-A59DFBE4D820	TCGA-C5-A7CM	2001/3/14	NO	YES	Female	[Not Available]	168	75	WHITE	HISPANIC OR LATINO	Alive	[Not Available]	[Not Available]	[Not Available]	[Not Available]	[Not Available]	[Not Available]	No	[Not Available]	TUMOR FREE	[Not Available]	[Not Available]	[Not Available]	[Not Available]	4	[Not Available]	1997	[Not Available]	[Not Available]	[Not Available]	0	[Not Available]	Post-Adjuvant Therapy	[Not Applicable]	Complete Remission/Response	35	No	[Not Available]	[Not Available]	[Not Available]	[Not Available]	[Not Available]	[Not Available]	Endocervical Adenocarcinoma of the Usual Type	[Not Available]	G2	2012	Biopsy (cervical / CT-guided / Other)	[Not Applicable]
FF3808E4-EECE-4046-819B-FE1019317F8E	TCGA-C5-A7CO	2001/3/14	NO	YES	Female	Post (prior bilateral ovariectomy OR >12 mo since LMP with no prior hysterectomy)	158	98	WHITE	NOT HISPANIC OR LATINO	Alive	[Not Available]	5	5	[Not Available]	0	[Not Available]	No	0	TUMOR FREE	0	0	[Not Available]	[Not Available]	3	20	1972	[Not Available]	38	[Not Available]	[Not Available]	[Not Available]	[Not Available]	[Not Applicable]	[Not Available]	68	No	[Not Available]	[Not Available]	[Not Available]	[Not Available]	[Not Available]	[Not Available]	Cervical Squamous Cell Carcinoma	[Not Available]	G2	2002	Biopsy (cervical / CT-guided / Other)	[Not Applicable]
5C326E9B-85E2-4673-9033-C11827467E1A	TCGA-C5-A7UC	2001/3/14	NO	YES	Female	[Not Available]	[Not Available]	[Not Available]	WHITE	[Not Available]	Dead	[Not Available]	[Not Available]	[Not Available]	[Not Available]	[Not Available]	[Not Available]	No	[Not Available]	TUMOR FREE	[Not Available]	[Not Available]	[Not Available]	[Not Available]	[Not Available]	[Not Available]	[Not Available]	[Not Available]	[Not Available]	[Not Available]	[Not Available]	[Not Available]	[Not Available]	[Not Applicable]	[Not Available]	48	No	[Not Available]	[Not Available]	[Not Available]	[Not Available]	[Not Available]	[Not Available]	Cervical Squamous Cell Carcinoma	Non-keratinizing squamous cell carcinoma	G3	2002	[Not Available]	[Not Applicable]
DA30A845-C4D3-4C78-B8B0-210239224F8F	TCGA-C5-A7UE	2001/3/14	NO	YES	Female	[Not Available]	160	63	WHITE	[Not Available]	Alive	[Not Available]	4	3	[Not Available]	0	[Not Available]	No	1	TUMOR FREE	0	0	[Not Available]	[Not Available]	2	17	[Not Available]	[Not Available]	35	[Not Available]	[Not Available]	[Not Available]	[Not Available]	[Not Applicable]	[Not Available]	45	No	[Not Available]	[Not Available]	[Not Available]	[Not Available]	[Not Available]	[Not Available]	Cervical Squamous Cell Carcinoma	[Not Available]	G2	2001	Biopsy (cervical / CT-guided / Other)	[Not Applicable]
8328925E-3324-4188-85F1-6FFBF819D9E7	TCGA-C5-A7UH	2001/3/14	NO	YES	Female	[Not Available]	163	56	WHITE	NOT HISPANIC OR LATINO	Alive	Former User	2	2	[Not Available]	0	[Not Available]	No	0	TUMOR FREE	0	0	[Not Available]	[Not Available]	1	[Not Available]	[Not Available]	[Not Available]	[Not Available]	[Not Available]	[Not Available]	[Not Available]	[Not Available]	[Not Applicable]	[Not Available]	55	No	[Not Available]	[Not Available]	[Not Available]	[Not Available]	[Not Available]	[Not Available]	Cervical Squamous Cell Carcinoma	[Not Available]	G3	2003	Biopsy (cervical / CT-guided / Other)	[Not Applicable]
CE5765FB-5221-4CBF-AA76-BB863803DF57	TCGA-C5-A7UI	2004/1/14	NO	YES	Female	[Not Available]	[Not Available]	86	BLACK OR AFRICAN AMERICAN	NOT HISPANIC OR LATINO	Dead	[Not Available]	4	3	[Not Available]	1	[Not Available]	No	[Not Available]	TUMOR FREE	[Not Available]	[Not Available]	[Not Available]	NO	2	[Not Available]	[Not Available]	[Not Available]	12	[Not Available]	[Not Available]	[Not Available]	[Not Available]	[Not Applicable]	[Not Available]	42	No	[Not Available]	[Not Available]	[Not Available]	[Not Available]	[Not Available]	[Not Available]	Cervical Squamous Cell Carcinoma	Non-keratinizing squamous cell carcinoma	G3	2004	Biopsy (cervical / CT-guided / Other)	[Not Applicable]
4ED1616E-8C62-4104-BCBE-26D7059F04D0	TCGA-C5-A7X3	2001/3/14	NO	YES	Female	[Not Available]	160	79	WHITE	NOT HISPANIC OR LATINO	Dead	Never Used	7	7	[Not Available]	0	[Not Available]	No	0	TUMOR FREE	0	0	[Not Available]	[Not Available]	1	[Not Available]	[Not Available]	[Not Available]	[Not Available]	[Not Available]	[Not Available]	[Not Available]	[Not Available]	[Not Applicable]	[Not Available]	70	No	[Not Available]	[Not Available]	[Not Available]	[Not Available]	[Not Available]	[Not Available]	Cervical Squamous Cell Carcinoma	Non-keratinizing squamous cell carcinoma	G2	1997	Biopsy (cervical / CT-guided / Other)	[Not Applicable]
AED93A3A-7DCB-4BA9-84C0-BC735CBD545F	TCGA-C5-A7X5	2001/3/14	NO	YES	Female	[Not Available]	163	59	BLACK OR AFRICAN AMERICAN	NOT HISPANIC OR LATINO	Dead	[Not Available]	[Not Available]	[Not Available]	Cervical Cancer	[Not Available]	[Not Available]	No	[Not Available]	WITH TUMOR	[Not Available]	[Not Available]	[Not Available]	[Not Available]	[Not Available]	[Not Available]	[Not Available]	[Not Available]	[Not Available]	[Not Available]	[Not Available]	[Not Available]	[Not Available]	[Not Applicable]	[Not Available]	72	No	[Not Available]	[Not Available]	[Not Available]	[Not Available]	[Not Available]	[Not Available]	Cervical Squamous Cell Carcinoma	Keratinizing squamous cell carcinoma	G3	2003	Biopsy (cervical / CT-guided / Other)	[Not Applicable]
57902B91-BE42-441D-8807-A5EA9C21B214	TCGA-C5-A7X8	2001/3/14	NO	YES	Female	[Not Available]	170	74	WHITE	NOT HISPANIC OR LATINO	Alive	[Not Available]	3	2	[Not Available]	1	[Not Available]	No	0	TUMOR FREE	0	0	[Not Available]	[Not Available]	2	25	[Not Available]	[Not Available]	5	[Not Available]	[Not Available]	[Not Available]	[Not Available]	[Not Applicable]	[Not Available]	35	No	[Not Available]	[Not Available]	[Not Available]	[Not Available]	[Not Available]	[Not Available]	Mucinous Adenocarcinoma of Endocervical Type	[Not Available]	G2	2003	Biopsy (cervical / CT-guided / Other)	[Not Applicable]
DEDFD5FB-3C72-40F9-A7EF-52C2176BF662	TCGA-C5-A7XC	2005/7/14	NO	YES	Female	[Not Available]	[Not Available]	53	WHITE	NOT HISPANIC OR LATINO	Alive	[Not Available]	1	1	[Not Available]	[Not Available]	[Not Available]	No	[Not Available]	TUMOR FREE	[Not Available]	[Not Available]	[Not Available]	NO	2	[Not Available]	[Not Available]	[Not Available]	5	[Not Available]	[Not Available]	[Not Available]	[Not Available]	[Not Applicable]	[Not Available]	26	No	[Not Available]	[Not Available]	[Not Available]	[Not Available]	[Not Available]	[Not Available]	Cervical Squamous Cell Carcinoma	[Not Available]	G2	2004	Biopsy (cervical / CT-guided / Other)	[Not Applicable]
183E8D87-3476-46BC-A989-ED4B09809227	TCGA-C5-A8XH	4/17/14	NO	YES	Female	[Not Available]	163	60	WHITE	NOT HISPANIC OR LATINO	Dead	[Not Available]	2	2	[Not Available]	[Not Available]	[Not Available]	No	[Not Available]	TUMOR FREE	[Not Available]	[Not Available]	[Not Available]	NO	4	[Not Available]	2007	[Not Available]	20	[Not Available]	[Not Available]	[Not Available]	[Not Available]	[Not Applicable]	[Not Available]	39	No	[Not Available]	[Not Available]	[Not Available]	[Not Available]	[Not Available]	[Not Available]	Cervical Squamous Cell Carcinoma	Keratinizing squamous cell carcinoma	[Not Available]	2007	Biopsy (cervical / CT-guided / Other)	[Not Applicable]
959FE574-054A-4FEF-9CBE-A801A9A355DE	TCGA-C5-A8XI	4/17/14	NO	YES	Female	Post (prior bilateral ovariectomy OR >12 mo since LMP with no prior hysterectomy)	[Not Available]	[Not Available]	BLACK OR AFRICAN AMERICAN	[Not Available]	Alive	[Not Available]	5	4	[Not Available]	1	[Not Available]	No	[Not Available]	TUMOR FREE	[Not Available]	[Not Available]	[Not Available]	[Not Available]	2	29	[Not Available]	[Not Available]	57	[Not Available]	[Not Available]	[Not Available]	[Not Available]	[Not Applicable]	[Not Available]	69	No	[Not Available]	[Not Available]	[Not Available]	[Not Available]	[Not Available]	[Not Available]	Cervical Squamous Cell Carcinoma	Non-keratinizing squamous cell carcinoma	G3	2008	Biopsy (cervical / CT-guided / Other)	[Not Applicable]
E89D0CB1-6EC2-43EE-A6D9-B922B680AF34	TCGA-C5-A8XJ	4/17/14	NO	YES	Female	[Not Available]	160	114	WHITE	NOT HISPANIC OR LATINO	Alive	[Not Available]	4	4	[Not Available]	[Not Available]	[Not Available]	No	[Not Available]	TUMOR FREE	[Not Available]	[Not Available]	[Not Available]	[Not Available]	1	[Not Available]	[Not Available]	[Not Available]	[Not Available]	[Not Available]	[Not Available]	[Not Available]	[Not Available]	[Not Applicable]	[Not Available]	74	Yes	[Not Available]	[Not Available]	[Not Available]	[Not Available]	[Not Available]	[Not Available]	Cervical Squamous Cell Carcinoma	[Not Available]	[Not Available]	2002	Biopsy (cervical / CT-guided / Other)	[Not Applicable]
8AC819B3-4227-4EAE-BE03-8760B197DF9A	TCGA-C5-A8XK	2004/1/14	NO	YES	Female	[Not Available]	[Not Available]	[Not Available]	BLACK OR AFRICAN AMERICAN	[Not Available]	Alive	[Not Available]	[Not Available]	[Not Available]	[Not Available]	[Not Available]	[Not Available]	No	[Not Available]	TUMOR FREE	[Not Available]	[Not Available]	[Not Available]	[Not Available]	[Not Available]	[Not Available]	[Not Available]	[Not Available]	[Not Available]	[Not Available]	[Not Available]	[Not Available]	[Not Available]	[Not Applicable]	[Not Available]	30	No	[Not Available]	[Not Available]	[Not Available]	[Not Available]	[Not Available]	[Not Available]	Cervical Squamous Cell Carcinoma	[Not Available]	G3	2000	Biopsy (cervical / CT-guided / Other)	[Not Applicable]
DE3CFB81-25C3-4137-8F24-AD8AA607C158	TCGA-C5-A8YQ	4/17/14	NO	YES	Female	Post (prior bilateral ovariectomy OR >12 mo since LMP with no prior hysterectomy)	165	70	WHITE	NOT HISPANIC OR LATINO	Dead	[Not Available]	2	1	Cervical Cancer	[Not Available]	[Not Available]	No	[Not Available]	WITH TUMOR	[Not Available]	[Not Available]	[Not Available]	[Not Available]	2	23	[Not Available]	[Not Available]	56	[Not Available]	[Not Available]	[Not Available]	[Not Available]	[Not Applicable]	[Not Available]	79	No	[Not Available]	[Not Available]	[Not Available]	[Not Available]	[Not Available]	[Not Available]	Cervical Squamous Cell Carcinoma	[Not Available]	G2	2006	Biopsy (cervical / CT-guided / Other)	[Not Applicable]
BE8B1C78-8CB1-4BFF-B1FE-71ECDC454C94	TCGA-C5-A8YR	2004/1/14	NO	YES	Female	[Not Available]	[Not Available]	80	WHITE	NOT HISPANIC OR LATINO	Dead	[Not Available]	6	4	[Not Available]	2	[Not Available]	No	[Not Available]	[Not Available]	[Not Available]	[Not Available]	[Not Available]	NO	1	[Not Available]	[Not Available]	[Not Available]	[Not Available]	[Not Available]	[Not Available]	[Not Available]	[Not Available]	[Not Applicable]	[Not Available]	56	No	[Not Available]	[Not Available]	[Not Available]	[Not Available]	[Not Available]	[Not Available]	Cervical Squamous Cell Carcinoma	Non-keratinizing squamous cell carcinoma	G3	1994	Biopsy (cervical / CT-guided / Other)	[Not Applicable]
CECAECB4-51EF-407D-A882-0E4B444B0A77	TCGA-C5-A8YT	4/17/14	NO	YES	Female	[Not Available]	[Not Available]	[Not Available]	WHITE	NOT HISPANIC OR LATINO	Dead	Never Used	3	3	[Not Available]	[Not Available]	[Not Available]	No	[Not Available]	WITH TUMOR	[Not Available]	[Not Available]	[Not Available]	[Not Available]	2	16	[Not Available]	[Not Available]	20	[Not Available]	[Not Available]	[Not Available]	[Not Available]	[Not Applicable]	[Not Available]	36	No	[Not Available]	[Not Available]	[Not Available]	[Not Available]	[Not Available]	[Not Available]	Cervical Squamous Cell Carcinoma	[Not Available]	G3	2008	Biopsy (cervical / CT-guided / Other)	[Not Applicable]
33BC6504-D9AB-4B64-A87C-012915F36644	TCGA-C5-A8ZZ	4/17/14	NO	YES	Female	Pre (<6 months since LMP AND no prior bilateral ovariectomy AND not on estrogen replacement)	[Not Available]	[Not Available]	WHITE	NOT HISPANIC OR LATINO	Alive	[Not Available]	4	4	[Not Available]	0	[Not Available]	No	0	TUMOR FREE	0	0	[Not Available]	[Not Available]	2	21	[Not Available]	[Not Available]	20	[Not Available]	[Not Available]	[Not Available]	[Not Available]	[Not Applicable]	[Not Available]	41	No	[Not Available]	[Not Available]	[Not Available]	[Not Available]	[Not Available]	[Not Available]	Cervical Squamous Cell Carcinoma	Keratinizing squamous cell carcinoma	G2	2005	Cone Biopsy / LEEP	[Not Applicable]
E8F07D20-D043-4C69-8898-87D0F0FC5A9A	TCGA-C5-A901	2004/1/14	NO	YES	Female	[Not Available]	166	54	WHITE	[Not Available]	Alive	[Not Available]	0	[Not Available]	[Not Available]	[Not Available]	[Not Available]	No	[Not Available]	TUMOR FREE	[Not Available]	[Not Available]	[Not Available]	[Not Available]	5	[Not Available]	[Not Available]	[Not Available]	2	[Not Available]	[Not Available]	[Not Available]	[Not Available]	[Not Applicable]	[Not Available]	44	No	[Not Available]	[Not Available]	[Not Available]	[Not Available]	[Not Available]	[Not Available]	Cervical Squamous Cell Carcinoma	Keratinizing squamous cell carcinoma	G2	2000	Cytology (e.g. Peritoneal or pleural fluid)	[Not Applicable]
010A807F-9DC0-4E14-9533-DCF478F3D947	TCGA-C5-A902	4/17/14	NO	YES	Female	[Not Available]	177	83	BLACK OR AFRICAN AMERICAN	NOT HISPANIC OR LATINO	Alive	[Not Available]	1	1	[Not Available]	[Not Available]	[Not Available]	No	[Not Available]	TUMOR FREE	[Not Available]	[Not Available]	[Not Available]	[Not Available]	2	14	[Not Available]	[Not Available]	21	[Not Available]	[Not Available]	[Not Available]	[Not Available]	[Not Applicable]	[Not Available]	35	No	[Not Available]	[Not Available]	[Not Available]	[Not Available]	[Not Available]	[Not Available]	Cervical Squamous Cell Carcinoma	[Not Available]	G3	2008	Biopsy (cervical / CT-guided / Other)	[Not Applicable]
C99F476B-E8B1-4CDD-9164-0DA450064886	TCGA-C5-A905	2004/1/14	NO	YES	Female	[Not Available]	[Not Available]	73	BLACK OR AFRICAN AMERICAN	NOT HISPANIC OR LATINO	Alive	[Not Available]	9	9	[Not Available]	[Not Available]	[Not Available]	No	[Not Available]	TUMOR FREE	[Not Available]	[Not Available]	[Not Available]	NO	[Not Available]	[Not Available]	[Not Available]	[Not Available]	[Not Available]	[Not Available]	[Not Available]	[Not Available]	[Not Available]	[Not Applicable]	[Not Available]	37	No	[Not Available]	[Not Available]	[Not Available]	[Not Available]	[Not Available]	[Not Available]	Cervical Squamous Cell Carcinoma	Non-keratinizing squamous cell carcinoma	G2	1994	Biopsy (cervical / CT-guided / Other)	[Not Applicable]
C92696BA-F549-480D-8D4A-5F23B27AA336	TCGA-C5-A907	2004/1/14	NO	YES	Female	[Not Available]	163	95	WHITE	NOT HISPANIC OR LATINO	Alive	[Not Available]	4	3	[Not Available]	1	[Not Available]	No	[Not Available]	TUMOR FREE	[Not Available]	[Not Available]	[Not Available]	NO	4	17	2006	[Not Available]	[Not Available]	[Not Available]	[Not Available]	[Not Available]	[Not Available]	[Not Applicable]	[Not Available]	47	No	[Not Available]	[Not Available]	[Not Available]	[Not Available]	[Not Available]	[Not Available]	Cervical Squamous Cell Carcinoma	[Not Available]	G2	2013	Biopsy (cervical / CT-guided / Other)	[Not Applicable]
6248F2A3-0DA9-419F-AB77-C3F6F4353EB5	TCGA-DG-A2KH	2010/11/13	NO	YES	Female	Pre (<6 months since LMP AND no prior bilateral ovariectomy AND not on estrogen replacement)	[Not Available]	[Not Available]	[Not Available]	[Not Available]	Alive	[Not Available]	[Not Available]	1	[Not Available]	[Not Available]	[Not Available]	No	[Not Available]	[Not Available]	[Not Available]	[Not Available]	[Not Available]	NO	4	[Not Available]	[Not Available]	[Not Available]	[Not Available]	[Not Available]	0	[Not Available]	Pre-Adjuvant Therapy	[Not Applicable]	[Not Available]	25	No	[Not Available]	[Not Available]	[Not Available]	[Not Available]	[Not Available]	[Not Available]	Adenosquamous	[Not Available]	GX	[Not Available]	Biopsy (cervical / CT-guided / Other)	[Not Applicable]
7C93642D-7E05-40F8-B1EF-A014EDCFBA42	TCGA-DG-A2KJ	2010/10/13	NO	YES	Female	[Not Available]	[Not Available]	[Not Available]	[Not Available]	[Not Available]	Alive	[Not Available]	[Not Available]	[Not Available]	[Not Available]	[Not Available]	[Not Available]	No	[Not Available]	TUMOR FREE	[Not Available]	[Not Available]	[Not Available]	[Not Available]	[Not Available]	[Not Available]	[Not Available]	[Not Available]	[Not Available]	[Not Available]	0	[Not Available]	Pre-Adjuvant Therapy	[Not Applicable]	[Not Available]	50	No	[Not Available]	[Not Available]	[Not Available]	[Not Available]	[Not Available]	[Not Available]	Cervical Squamous Cell Carcinoma	Non-keratinizing squamous cell carcinoma	G3	2006	Other method, specify:	endometrial biopsy
8DBCB17D-0396-4FAA-9B32-8E2566424BFF	TCGA-DG-A2KK	2010/11/13	NO	YES	Female	Post (prior bilateral ovariectomy OR >12 mo since LMP with no prior hysterectomy)	157	64	[Not Available]	[Not Available]	Alive	[Not Available]	0	[Not Available]	[Not Available]	[Not Available]	[Not Available]	No	[Not Available]	TUMOR FREE	[Not Available]	[Not Available]	[Not Available]	[Not Available]	4	27	2007	[Not Available]	25	[Not Available]	0	[Not Available]	Pre-Adjuvant Therapy	[Not Applicable]	Complete Remission/Response	51	No	[Not Available]	[Not Available]	[Not Available]	[Not Available]	[Not Available]	[Not Available]	Cervical Squamous Cell Carcinoma	[Not Available]	G3	2007	Biopsy (cervical / CT-guided / Other)	[Not Applicable]
2DA977FC-8B46-4C40-9636-B12FD36A98E4	TCGA-DG-A2KL	6/20/14	NO	YES	Female	Post (prior bilateral ovariectomy OR >12 mo since LMP with no prior hysterectomy)	155	75	[Not Available]	[Not Available]	Alive	[Not Available]	5	5	[Not Available]	0	[Not Available]	No	0	TUMOR FREE	0	0	[Not Available]	NO	2	[Not Available]	[Not Available]	[Not Available]	25	[Not Available]	0	[Not Available]	Pre-Adjuvant Therapy	[Not Applicable]	Complete Remission/Response	53	No	[Not Available]	[Not Available]	[Not Available]	[Not Available]	[Not Available]	[Not Available]	Cervical Squamous Cell Carcinoma	Keratinizing squamous cell carcinoma	G1	[Not Available]	Other method, specify:	Dilation and curettage
E87FADBE-C58C-41D1-B413-8CF6CE70CE94	TCGA-DG-A2KM	2010/10/13	NO	YES	Female	[Not Available]	169	[Not Available]	[Not Available]	[Not Available]	Alive	Former User	2	2	[Not Available]	[Not Available]	[Not Available]	No	[Not Available]	TUMOR FREE	[Not Available]	[Not Available]	[Not Available]	[Not Available]	1	[Not Available]	[Not Available]	[Not Available]	[Not Available]	[Not Available]	0	[Not Available]	Pre-Adjuvant Therapy	[Not Applicable]	Complete Remission/Response	46	No	[Not Available]	[Not Available]	[Not Available]	[Not Available]	[Not Available]	[Not Available]	Cervical Squamous Cell Carcinoma	[Not Available]	G2	2008	Biopsy (cervical / CT-guided / Other)	[Not Applicable]
36605f5f-245c-41e5-a9db-705373da7923	TCGA-DR-A0ZL	3/28/11	NO	YES	Female	Post (prior bilateral ovariectomy OR >12 mo since LMP with no prior hysterectomy)	155	57	ASIAN	NOT HISPANIC OR LATINO	Alive	Never Used	1	1	[Not Available]	0	[Not Available]	No	0	TUMOR FREE	0	0	[Not Available]	NO	1	[Not Available]	[Not Available]	[Not Available]	[Not Available]	[Not Available]	[Not Available]	[Not Available]	[Not Available]	[Not Applicable]	[Not Available]	53	No	[Not Available]	[Not Available]	[Not Available]	[Not Available]	[Not Available]	[Not Available]	Cervical Squamous Cell Carcinoma	Non-keratinizing squamous cell carcinoma	G3	2004	Biopsy (cervical / CT-guided / Other)	[Not Applicable]
748aada0-448f-4523-9893-3d9618fdbe18	TCGA-DR-A0ZM	3/28/11	NO	YES	Female	Post (prior bilateral ovariectomy OR >12 mo since LMP with no prior hysterectomy)	158	64	WHITE	NOT HISPANIC OR LATINO	Alive	Former User	4	3	[Not Available]	1	[Not Available]	No	[Not Available]	TUMOR FREE	[Not Available]	[Not Available]	[Not Available]	NO	2	30	[Not Available]	[Not Available]	15	[Not Available]	0	[Not Available]	Preoperative	[Not Applicable]	[Not Available]	61	No	[Not Available]	[Not Available]	[Not Available]	[Not Available]	[Not Available]	[Not Available]	Cervical Squamous Cell Carcinoma	Non-keratinizing squamous cell carcinoma	G2	2006	Cone Biopsy / LEEP	[Not Applicable]
5ed3c95a-10d0-4cd5-a54d-523e81587fb1	TCGA-DS-A0VK	2002/3/11	NO	YES	Female	Pre (<6 months since LMP AND no prior bilateral ovariectomy AND not on estrogen replacement)	165	52	WHITE	NOT HISPANIC OR LATINO	Dead	Never Used	4	1	[Not Available]	0	[Not Available]	No	3	WITH TUMOR	0	0	[Not Available]	NO	4	[Not Available]	[Not Available]	[Not Available]	[Not Available]	[Not Available]	1	[Not Available]	Preoperative	[Not Applicable]	[Not Available]	45	No	[Not Available]	[Not Available]	[Not Available]	[Not Available]	[Not Available]	[Not Available]	Cervical Squamous Cell Carcinoma	Keratinizing squamous cell carcinoma	G3	1996	Other method, specify:	Surgery
dfd30f94-19e3-4838-95df-14a3763419af	TCGA-DS-A0VL	2001/7/11	NO	YES	Female	Pre (<6 months since LMP AND no prior bilateral ovariectomy AND not on estrogen replacement)	170	86	WHITE	[Not Available]	Dead	Never Used	5	4	[Not Available]	1	[Not Available]	No	0	TUMOR FREE	0	0	[Not Available]	NO	1	[Not Available]	[Not Available]	[Not Available]	[Not Available]	[Not Available]	0	[Not Available]	Preoperative	[Not Applicable]	[Not Available]	25	No	[Not Available]	[Not Available]	[Not Available]	[Not Available]	[Not Available]	[Not Available]	Cervical Squamous Cell Carcinoma	Non-keratinizing squamous cell carcinoma	G2	2001	Biopsy (cervical / CT-guided / Other)	[Not Applicable]
ed6d989d-da09-4818-8fed-f33d88b628af	TCGA-DS-A0VM	2001/7/11	NO	YES	Female	Post (prior bilateral ovariectomy OR >12 mo since LMP with no prior hysterectomy)	163	69	WHITE	NOT HISPANIC OR LATINO	Alive	Former User	2	2	[Not Available]	0	[Not Available]	No	0	TUMOR FREE	0	0	[Not Available]	NO	1	[Not Available]	[Not Available]	[Not Available]	[Not Available]	[Not Available]	1	[Not Available]	Preoperative	[Not Applicable]	[Not Available]	51	No	[Not Available]	[Not Available]	[Not Available]	[Not Available]	[Not Available]	[Not Available]	Cervical Squamous Cell Carcinoma	Non-keratinizing squamous cell carcinoma	G3	2003	Biopsy (cervical / CT-guided / Other)	[Not Applicable]
f8d342f5-9b92-42e1-8b0d-0876cc26965d	TCGA-DS-A0VN	2003/4/11	NO	YES	Female	Pre (<6 months since LMP AND no prior bilateral ovariectomy AND not on estrogen replacement)	165	81	WHITE	NOT HISPANIC OR LATINO	Alive	Former User	4	2	[Not Available]	0	[Not Available]	No	2	TUMOR FREE	0	0	[Not Available]	NO	1	[Not Available]	[Not Available]	[Not Available]	[Not Available]	[Not Available]	1	[Not Available]	Preoperative	[Not Applicable]	[Not Available]	47	No	[Not Available]	[Not Available]	[Not Available]	[Not Available]	[Not Available]	[Not Available]	Cervical Squamous Cell Carcinoma	Keratinizing squamous cell carcinoma	G2	2002	Biopsy (cervical / CT-guided / Other)	[Not Applicable]
b8eae533-2ad6-4dcf-98af-0fe7ff23a879	TCGA-DS-A1O9	2008/12/11	NO	YES	Female	Post (prior bilateral ovariectomy OR >12 mo since LMP with no prior hysterectomy)	132	32	WHITE	NOT HISPANIC OR LATINO	Dead	Never Used	2	2	[Not Available]	0	[Not Available]	No	0	WITH TUMOR	0	0	[Not Available]	NO	2	[Not Available]	[Not Available]	[Not Available]	[Not Available]	[Not Available]	1	[Not Available]	Preoperative	[Not Applicable]	[Not Available]	75	No	[Not Available]	[Not Available]	[Not Available]	[Not Available]	[Not Available]	[Not Available]	Cervical Squamous Cell Carcinoma	Keratinizing squamous cell carcinoma	G3	1999	Biopsy (cervical / CT-guided / Other)	[Not Applicable]
46c67dd6-8e66-411d-ad05-95daa9005eb2	TCGA-DS-A1OA	2008/12/11	NO	YES	Female	Post (prior bilateral ovariectomy OR >12 mo since LMP with no prior hysterectomy)	160	51	ASIAN	NOT HISPANIC OR LATINO	Dead	Never Used	7	7	[Not Available]	0	[Not Available]	No	0	WITH TUMOR	0	0	[Not Available]	NO	1	[Not Available]	[Not Available]	[Not Available]	[Not Available]	[Not Available]	0	[Not Available]	Preoperative	[Not Applicable]	[Not Available]	77	No	[Not Available]	[Not Available]	[Not Available]	[Not Available]	[Not Available]	[Not Available]	Cervical Squamous Cell Carcinoma	Non-keratinizing squamous cell carcinoma	G3	2001	Biopsy (cervical / CT-guided / Other)	[Not Applicable]
29a48c93-bade-4346-a901-de35a6537337	TCGA-DS-A1OB	2001/4/12	NO	YES	Female	Pre (<6 months since LMP AND no prior bilateral ovariectomy AND not on estrogen replacement)	152	72	WHITE	NOT HISPANIC OR LATINO	Dead	Never Used	4	1	[Not Available]	[Not Available]	[Not Available]	No	[Not Available]	WITH TUMOR	[Not Available]	[Not Available]	[Not Available]	NO	[Not Available]	[Not Available]	[Not Available]	[Not Available]	[Not Available]	[Not Available]	1	[Not Available]	Preoperative	[Not Applicable]	[Not Available]	45	No	[Not Available]	[Not Available]	[Not Available]	[Not Available]	[Not Available]	[Not Available]	Cervical Squamous Cell Carcinoma	Keratinizing squamous cell carcinoma	G2	2007	Biopsy (cervical / CT-guided / Other)	[Not Applicable]
e711b88e-fa0e-4781-8549-7a53ed3a13a1	TCGA-DS-A1OC	2008/12/11	NO	YES	Female	Pre (<6 months since LMP AND no prior bilateral ovariectomy AND not on estrogen replacement)	140	78	WHITE	HISPANIC OR LATINO	Alive	[Not Available]	3	3	[Not Available]	0	[Not Available]	No	0	TUMOR FREE	0	0	[Not Available]	NO	4	[Not Available]	[Not Available]	[Not Available]	[Not Available]	[Not Available]	1	[Not Available]	Preoperative	[Not Applicable]	[Not Available]	47	Yes	[Not Available]	[Not Available]	[Not Available]	[Not Available]	[Not Available]	[Not Available]	Cervical Squamous Cell Carcinoma	Keratinizing squamous cell carcinoma	G2	2010	Biopsy (cervical / CT-guided / Other)	[Not Applicable]
ec609ebe-2db9-4b95-a154-512fdfa9038f	TCGA-DS-A1OD	2008/12/11	NO	YES	Female	Pre (<6 months since LMP AND no prior bilateral ovariectomy AND not on estrogen replacement)	155	89	WHITE	NOT HISPANIC OR LATINO	Alive	Never Used	1	1	[Not Available]	0	[Not Available]	No	0	TUMOR FREE	0	0	[Not Available]	NO	4	[Not Available]	[Not Available]	[Not Available]	[Not Available]	[Not Available]	1	[Not Available]	Preoperative	[Not Applicable]	[Not Available]	49	No	[Not Available]	[Not Available]	[Not Available]	[Not Available]	[Not Available]	[Not Available]	Cervical Squamous Cell Carcinoma	Keratinizing squamous cell carcinoma	G3	2003	Biopsy (cervical / CT-guided / Other)	[Not Applicable]
63BFFDB1-BC08-4175-8BE7-D7A056D19816	TCGA-DS-A3LQ	4/23/12	YES	NO	Female	Pre (<6 months since LMP AND no prior bilateral ovariectomy AND not on estrogen replacement)	163	72	[Not Available]	[Not Available]	Alive	Former User	7	2	[Not Available]	[Not Available]	[Not Available]	No	[Not Available]	[Not Available]	[Not Available]	[Not Available]	[Not Available]	NO	3	[Not Available]	1978	[Not Available]	[Not Available]	[Not Available]	1	[Not Available]	Preoperative	[Not Applicable]	[Not Available]	46	No	[Not Available]	[Not Available]	[Not Available]	[Not Available]	[Not Available]	[Not Available]	Cervical Squamous Cell Carcinoma	Non-keratinizing squamous cell carcinoma	G3	2011	Cone Biopsy / LEEP	[Not Applicable]
B16469AF-A721-43E9-A4D7-C39B94D1139F	TCGA-DS-A5RQ	5/15/13	YES	NO	Female	Post (prior bilateral ovariectomy OR >12 mo since LMP with no prior hysterectomy)	148	61	WHITE	NOT HISPANIC OR LATINO	Alive	[Not Available]	3	3	[Not Available]	0	[Not Available]	No	0	TUMOR FREE	0	0	[Not Available]	NO	2	27	[Not Available]	[Not Available]	35	[Not Available]	1	[Not Available]	Preoperative	[Not Applicable]	Complete Remission/Response	80	No	[Not Available]	[Not Available]	[Not Available]	[Not Available]	[Not Available]	[Not Available]	Cervical Squamous Cell Carcinoma	Keratinizing squamous cell carcinoma	G2	2012	Biopsy (cervical / CT-guided / Other)	[Not Applicable]
D02FFAA9-0403-4A89-BE01-CCE35C80DD69	TCGA-DS-A7WF	12/23/13	NO	YES	Female	Pre (<6 months since LMP AND no prior bilateral ovariectomy AND not on estrogen replacement)	160	63	[Not Available]	HISPANIC OR LATINO	Dead	Never Used	3	1	Cervical Cancer	1	[Not Available]	No	1	WITH TUMOR	0	0	[Not Available]	NO	2	[Not Available]	[Not Available]	[Not Available]	7	[Not Available]	1	[Not Available]	Preoperative	[Not Applicable]	Partial Remission/Response	41	No	[Not Available]	[Not Available]	[Not Available]	[Not Available]	[Not Available]	[Not Available]	Adenosquamous	Non-keratinizing squamous cell carcinoma	G3	2006	Biopsy (cervical / CT-guided / Other)	[Not Applicable]
DADCF6D5-03EB-4090-BCC3-B9E9DC3C7E08	TCGA-DS-A7WH	12/23/12	YES	NO	Female	Pre (<6 months since LMP AND no prior bilateral ovariectomy AND not on estrogen replacement)	168	50	WHITE	NOT HISPANIC OR LATINO	Alive	Former User	2	0	[Not Available]	1	[Not Available]	No	1	TUMOR FREE	0	0	[Not Available]	NO	1	[Not Available]	[Not Available]	[Not Available]	[Not Available]	[Not Available]	1	[Not Available]	Preoperative	[Not Applicable]	Complete Remission/Response	34	No	[Not Available]	[Not Available]	[Not Available]	[Not Available]	[Not Available]	[Not Available]	Mucinous Adenocarcinoma of Endocervical Type	Non-keratinizing squamous cell carcinoma	G2	2013	Biopsy (cervical / CT-guided / Other)	[Not Applicable]
C14468EB-E725-4029-96CC-75BB9EBD9DEF	TCGA-DS-A7WI	12/23/13	YES	NO	Female	Pre (<6 months since LMP AND no prior bilateral ovariectomy AND not on estrogen replacement)	165	57	WHITE	NOT HISPANIC OR LATINO	Dead	Never Used	8	7	Cervical Cancer	1	[Not Available]	No	0	WITH TUMOR	0	0	[Not Available]	NO	1	[Not Available]	[Not Available]	[Not Available]	[Not Available]	[Not Available]	1	[Not Available]	Preoperative	[Not Applicable]	Complete Remission/Response	43	No	[Not Available]	[Not Available]	[Not Available]	[Not Available]	[Not Available]	[Not Available]	Cervical Squamous Cell Carcinoma	Non-keratinizing squamous cell carcinoma	G2	2013	Biopsy (cervical / CT-guided / Other)	[Not Applicable]
6F9D21C0-3B88-450D-A249-3E9BAFBA2DFA	TCGA-EA-A1QS	2007/6/12	YES	NO	Female	Post (prior bilateral ovariectomy OR >12 mo since LMP with no prior hysterectomy)	164	60	WHITE	NOT HISPANIC OR LATINO	Alive	Never Used	6	2	[Not Available]	0	[Not Available]	No	4	TUMOR FREE	0	0	[Not Available]	NO	1	[Not Available]	[Not Available]	[Not Available]	[Not Available]	[Not Available]	[Not Available]	[Not Available]	[Not Available]	[Not Applicable]	Complete Remission/Response	46	No	[Not Available]	[Not Available]	[Not Available]	[Not Available]	[Not Available]	[Not Available]	Cervical Squamous Cell Carcinoma	Non-keratinizing squamous cell carcinoma	G2	2010	Biopsy (cervical / CT-guided / Other)	[Not Applicable]
970b619f-2eb5-4557-a7b8-5def35943c58	TCGA-EA-A1QT	2008/3/11	YES	NO	Female	Post (prior bilateral ovariectomy OR >12 mo since LMP with no prior hysterectomy)	163	68	WHITE	NOT HISPANIC OR LATINO	Alive	Never Used	5	2	[Not Available]	0	[Not Available]	No	3	[Not Available]	0	0	[Not Available]	NO	1	[Not Available]	[Not Available]	[Not Available]	[Not Available]	[Not Available]	[Not Available]	[Not Available]	[Not Available]	[Not Applicable]	[Not Available]	47	No	[Not Available]	[Not Available]	[Not Available]	[Not Available]	[Not Available]	[Not Available]	Cervical Squamous Cell Carcinoma	Non-keratinizing squamous cell carcinoma	G2	2011	Cytology (e.g. Peritoneal or pleural fluid)	[Not Applicable]
6BF00B63-89F8-420C-8D36-F680FB0908B1	TCGA-EA-A3HQ	2/17/12	YES	NO	Female	Post (prior bilateral ovariectomy OR >12 mo since LMP with no prior hysterectomy)	160	88	WHITE	NOT HISPANIC OR LATINO	Alive	Never Used	4	2	[Not Available]	0	[Not Available]	No	2	TUMOR FREE	0	0	[Not Available]	NO	1	[Not Available]	[Not Available]	[Not Available]	[Not Available]	[Not Available]	[Not Available]	[Not Available]	[Not Available]	[Not Applicable]	[Not Available]	60	No	[Not Available]	[Not Available]	[Not Available]	[Not Available]	[Not Available]	[Not Available]	Cervical Squamous Cell Carcinoma	Non-keratinizing squamous cell carcinoma	G2	2011	Biopsy (cervical / CT-guided / Other)	[Not Applicable]
638035F6-2909-4A44-980F-468AC5D74E18	TCGA-EA-A3HR	12/20/11	YES	NO	Female	Post (prior bilateral ovariectomy OR >12 mo since LMP with no prior hysterectomy)	146	86	WHITE	NOT HISPANIC OR LATINO	Alive	Never Used	15	2	[Not Available]	0	[Not Available]	No	13	TUMOR FREE	[Not Available]	[Not Available]	[Not Available]	NO	1	[Not Available]	[Not Available]	[Not Available]	[Not Available]	[Not Available]	[Not Available]	[Not Available]	[Not Available]	[Not Applicable]	[Not Available]	57	No	[Not Available]	[Not Available]	[Not Available]	[Not Available]	[Not Available]	[Not Available]	Cervical Squamous Cell Carcinoma	Non-keratinizing squamous cell carcinoma	G2	2011	Cytology (e.g. Peritoneal or pleural fluid)	[Not Applicable]
753EE373-FBCF-4349-B9B2-5A41936E27E9	TCGA-EA-A3HS	12/20/11	YES	NO	Female	Pre (<6 months since LMP AND no prior bilateral ovariectomy AND not on estrogen replacement)	169	54	WHITE	NOT HISPANIC OR LATINO	Alive	Never Used	2	1	[Not Available]	0	[Not Available]	No	1	TUMOR FREE	0	0	[Not Available]	NO	1	[Not Available]	[Not Available]	[Not Available]	[Not Available]	[Not Available]	[Not Available]	[Not Available]	[Not Available]	[Not Applicable]	[Not Available]	35	No	[Not Available]	[Not Available]	[Not Available]	[Not Available]	[Not Available]	[Not Available]	Cervical Squamous Cell Carcinoma	Keratinizing squamous cell carcinoma	G1	2011	Cytology (e.g. Peritoneal or pleural fluid)	[Not Applicable]
3C5B2452-014B-495F-B86A-F522ED84BC3B	TCGA-EA-A3HT	12/20/11	YES	NO	Female	Post (prior bilateral ovariectomy OR >12 mo since LMP with no prior hysterectomy)	163	83	WHITE	NOT HISPANIC OR LATINO	Alive	Never Used	3	1	[Not Available]	0	[Not Available]	No	2	TUMOR FREE	0	0	[Not Available]	NO	1	[Not Available]	[Not Available]	[Not Available]	[Not Available]	[Not Available]	[Not Available]	[Not Available]	[Not Available]	[Not Applicable]	[Not Available]	68	No	[Not Available]	[Not Available]	[Not Available]	[Not Available]	[Not Available]	[Not Available]	Cervical Squamous Cell Carcinoma	Keratinizing squamous cell carcinoma	G1	2011	Cytology (e.g. Peritoneal or pleural fluid)	[Not Applicable]
9912432E-74BC-4846-93B4-FA2BF8070BD1	TCGA-EA-A3HU	2/17/12	YES	NO	Female	Pre (<6 months since LMP AND no prior bilateral ovariectomy AND not on estrogen replacement)	162	68	WHITE	NOT HISPANIC OR LATINO	Alive	Never Used	12	2	[Not Available]	0	[Not Available]	No	10	TUMOR FREE	0	0	[Not Available]	NO	1	[Not Available]	[Not Available]	[Not Available]	[Not Available]	[Not Available]	[Not Available]	[Not Available]	[Not Available]	[Not Applicable]	[Not Available]	43	No	[Not Available]	[Not Available]	[Not Available]	[Not Available]	[Not Available]	[Not Available]	Cervical Squamous Cell Carcinoma	Non-keratinizing squamous cell carcinoma	G2	2011	Cytology (e.g. Peritoneal or pleural fluid)	[Not Applicable]
9E2E29E8-D94A-499F-A98A-5B53B2C38F3B	TCGA-EA-A3QD	4/30/12	YES	NO	Female	Post (prior bilateral ovariectomy OR >12 mo since LMP with no prior hysterectomy)	163	105	WHITE	NOT HISPANIC OR LATINO	Alive	Former User	6	5	[Not Available]	1	[Not Available]	No	0	TUMOR FREE	0	0	[Not Available]	NO	1	[Not Available]	[Not Available]	[Not Available]	[Not Available]	[Not Available]	0	[Not Available]	Preoperative	[Not Applicable]	[Not Available]	59	No	[Not Available]	[Not Available]	[Not Available]	[Not Available]	[Not Available]	[Not Available]	Cervical Squamous Cell Carcinoma	Non-keratinizing squamous cell carcinoma	G3	2011	Cytology (e.g. Peritoneal or pleural fluid)	[Not Applicable]
A4E444B5-BBCA-4EF0-B92F-908D608CBB91	TCGA-EA-A3QE	2005/9/12	YES	NO	Female	Pre (<6 months since LMP AND no prior bilateral ovariectomy AND not on estrogen replacement)	154	73	WHITE	NOT HISPANIC OR LATINO	Alive	Never Used	5	1	[Not Available]	0	[Not Available]	No	4	TUMOR FREE	0	0	[Not Available]	NO	1	[Not Available]	[Not Available]	[Not Available]	[Not Available]	[Not Available]	[Not Available]	[Not Available]	[Not Available]	[Not Applicable]	[Not Available]	45	No	[Not Available]	[Not Available]	[Not Available]	[Not Available]	[Not Available]	[Not Available]	Cervical Squamous Cell Carcinoma	Non-keratinizing squamous cell carcinoma	G2	2011	Biopsy (cervical / CT-guided / Other)	[Not Applicable]
3AC62513-B5F4-4063-AABD-DAD08A1F56FB	TCGA-EA-A3Y4	9/24/12	YES	NO	Female	Pre (<6 months since LMP AND no prior bilateral ovariectomy AND not on estrogen replacement)	167	99	WHITE	NOT HISPANIC OR LATINO	Alive	[Not Available]	3	1	[Not Available]	0	[Not Available]	No	2	TUMOR FREE	0	0	[Not Available]	NO	1	[Not Available]	[Not Available]	[Not Available]	[Not Available]	[Not Available]	1	[Not Available]	Pre-Adjuvant Therapy	[Not Applicable]	Complete Remission/Response	40	No	[Not Available]	[Not Available]	[Not Available]	[Not Available]	[Not Available]	[Not Available]	Cervical Squamous Cell Carcinoma	Non-keratinizing squamous cell carcinoma	G3	2012	Biopsy (cervical / CT-guided / Other)	[Not Applicable]
7B356C12-B226-4E58-BE7F-44E50E3EEFBE	TCGA-EA-A410	9/24/12	YES	NO	Female	Pre (<6 months since LMP AND no prior bilateral ovariectomy AND not on estrogen replacement)	160	80	WHITE	NOT HISPANIC OR LATINO	Alive	Never Used	6	2	[Not Available]	0	[Not Available]	No	4	TUMOR FREE	0	0	[Not Available]	NO	1	[Not Available]	[Not Available]	[Not Available]	[Not Available]	[Not Available]	[Not Available]	[Not Available]	[Not Available]	[Not Applicable]	Complete Remission/Response	51	No	[Not Available]	[Not Available]	[Not Available]	[Not Available]	[Not Available]	[Not Available]	Cervical Squamous Cell Carcinoma	Non-keratinizing squamous cell carcinoma	G2	2012	Biopsy (cervical / CT-guided / Other)	[Not Applicable]
84CB84D0-7C7E-453C-8CC5-65B5AF941028	TCGA-EA-A411	9/24/12	YES	NO	Female	Post (prior bilateral ovariectomy OR >12 mo since LMP with no prior hysterectomy)	176	74	WHITE	NOT HISPANIC OR LATINO	Alive	Former User	5	2	[Not Available]	0	[Not Available]	No	3	TUMOR FREE	0	0	[Not Available]	NO	1	[Not Available]	[Not Available]	[Not Available]	[Not Available]	[Not Available]	[Not Available]	[Not Available]	[Not Available]	[Not Applicable]	Complete Remission/Response	50	No	[Not Available]	[Not Available]	[Not Available]	[Not Available]	[Not Available]	[Not Available]	Cervical Squamous Cell Carcinoma	Non-keratinizing squamous cell carcinoma	G2	2012	Cytology (e.g. Peritoneal or pleural fluid)	[Not Applicable]
3EDB62C1-25AD-4DEB-A005-E881A887D06A	TCGA-EA-A439	11/20/12	YES	NO	Female	Pre (<6 months since LMP AND no prior bilateral ovariectomy AND not on estrogen replacement)	160	47	ASIAN	NOT HISPANIC OR LATINO	Alive	[Not Available]	2	2	[Not Available]	[Not Available]	[Not Available]	No	[Not Available]	TUMOR FREE	[Not Available]	[Not Available]	[Not Available]	NO	1	[Not Available]	[Not Available]	[Not Available]	[Not Available]	[Not Available]	[Not Available]	[Not Available]	[Not Available]	[Not Applicable]	Complete Remission/Response	50	No	[Not Available]	[Not Available]	[Not Available]	[Not Available]	[Not Available]	[Not Available]	Cervical Squamous Cell Carcinoma	Non-keratinizing squamous cell carcinoma	G3	2012	Biopsy (cervical / CT-guided / Other)	[Not Applicable]
3265F9C1-7242-4C7D-B4AD-B6519EE94F84	TCGA-EA-A43B	11/20/12	YES	NO	Female	Pre (<6 months since LMP AND no prior bilateral ovariectomy AND not on estrogen replacement)	164	72	WHITE	NOT HISPANIC OR LATINO	Alive	Never Used	2	2	[Not Available]	[Not Available]	[Not Available]	No	[Not Available]	TUMOR FREE	[Not Available]	[Not Available]	[Not Available]	NO	1	[Not Available]	[Not Available]	[Not Available]	[Not Available]	[Not Available]	0	[Not Available]	Preoperative	[Not Applicable]	Complete Remission/Response	43	No	[Not Available]	[Not Available]	[Not Available]	[Not Available]	[Not Available]	[Not Available]	Cervical Squamous Cell Carcinoma	Keratinizing squamous cell carcinoma	G2	2012	Biopsy (cervical / CT-guided / Other)	[Not Applicable]
CFB61FD8-0BCA-40B4-878C-CC914A289792	TCGA-EA-A44S	12/19/12	YES	NO	Female	Pre (<6 months since LMP AND no prior bilateral ovariectomy AND not on estrogen replacement)	182	83	WHITE	NOT HISPANIC OR LATINO	Alive	Never Used	1	1	[Not Available]	0	[Not Available]	No	0	TUMOR FREE	0	0	[Not Available]	NO	1	[Not Available]	[Not Available]	[Not Available]	[Not Available]	[Not Available]	1	[Not Available]	Preoperative	[Not Applicable]	[Not Available]	31	No	[Not Available]	[Not Available]	[Not Available]	[Not Available]	[Not Available]	[Not Available]	Cervical Squamous Cell Carcinoma	Non-keratinizing squamous cell carcinoma	G2	2012	Biopsy (cervical / CT-guided / Other)	[Not Applicable]
9E79059F-3453-4AA6-9849-55A267C711A4	TCGA-EA-A4BA	2002/5/13	YES	NO	Female	Pre (<6 months since LMP AND no prior bilateral ovariectomy AND not on estrogen replacement)	162	96	WHITE	NOT HISPANIC OR LATINO	Alive	Never Used	4	2	[Not Available]	[Not Available]	[Not Available]	No	2	TUMOR FREE	[Not Available]	[Not Available]	[Not Available]	NO	1	[Not Available]	[Not Available]	[Not Available]	[Not Available]	[Not Available]	1	[Not Available]	Preoperative	[Not Applicable]	Complete Remission/Response	49	No	[Not Available]	[Not Available]	[Not Available]	[Not Available]	[Not Available]	[Not Available]	Endocervical Type of Adenocarcinoma	[Not Available]	G2	2012	Biopsy (cervical / CT-guided / Other)	[Not Applicable]
6A18D184-D3A2-49C2-BD4B-9C18F91B98C7	TCGA-EA-A50E	2/27/13	YES	NO	Female	Pre (<6 months since LMP AND no prior bilateral ovariectomy AND not on estrogen replacement)	152	45	ASIAN	NOT HISPANIC OR LATINO	Dead	Former User	2	2	[Not Available]	[Not Available]	[Not Available]	No	[Not Available]	WITH TUMOR	[Not Available]	[Not Available]	[Not Available]	NO	1	[Not Available]	[Not Available]	[Not Available]	[Not Available]	[Not Available]	[Not Available]	[Not Available]	[Not Available]	[Not Applicable]	[Not Available]	45	No	[Not Available]	[Not Available]	[Not Available]	[Not Available]	[Not Available]	[Not Available]	Cervical Squamous Cell Carcinoma	Non-keratinizing squamous cell carcinoma	G2	2012	Biopsy (cervical / CT-guided / Other)	[Not Applicable]
2D34E9A3-298C-4365-B7A1-A507C7F069CD	TCGA-EA-A556	4/22/13	YES	NO	Female	Pre (<6 months since LMP AND no prior bilateral ovariectomy AND not on estrogen replacement)	160	62	WHITE	NOT HISPANIC OR LATINO	Alive	Never Used	1	1	[Not Available]	0	[Not Available]	No	0	TUMOR FREE	0	0	[Not Available]	NO	2	18	[Not Available]	[Not Available]	20	[Not Available]	1	[Not Available]	Preoperative	[Not Applicable]	[Not Available]	38	No	[Not Available]	[Not Available]	[Not Available]	[Not Available]	[Not Available]	[Not Available]	Endometrioid Adenocarcinoma of Endocervix	[Not Available]	G3	2012	Cytology (e.g. Peritoneal or pleural fluid)	[Not Applicable]
ED17685C-B706-41E4-8A76-11CB0E6700CD	TCGA-EA-A5FO	5/22/13	YES	NO	Female	Post (prior bilateral ovariectomy OR >12 mo since LMP with no prior hysterectomy)	162	58	WHITE	NOT HISPANIC OR LATINO	Alive	[Not Available]	[Not Available]	2	[Not Available]	[Not Available]	[Not Available]	No	[Not Available]	TUMOR FREE	[Not Available]	[Not Available]	[Not Available]	NO	1	[Not Available]	[Not Available]	[Not Available]	[Not Available]	[Not Available]	1	[Not Available]	Preoperative	[Not Applicable]	[Not Available]	59	No	[Not Available]	[Not Available]	[Not Available]	[Not Available]	[Not Available]	[Not Available]	Cervical Squamous Cell Carcinoma	Non-keratinizing squamous cell carcinoma	G2	2012	Biopsy (cervical / CT-guided / Other)	[Not Applicable]
1636242C-12DA-412E-A362-914A20ADD708	TCGA-EA-A5O9	5/22/13	YES	NO	Female	Pre (<6 months since LMP AND no prior bilateral ovariectomy AND not on estrogen replacement)	160	99	WHITE	NOT HISPANIC OR LATINO	Alive	Never Used	11	4	[Not Available]	0	[Not Available]	No	7	TUMOR FREE	0	0	[Not Available]	NO	1	[Not Available]	[Not Available]	[Not Available]	[Not Available]	[Not Available]	1	[Not Available]	Preoperative	[Not Applicable]	Complete Remission/Response	39	No	[Not Available]	[Not Available]	[Not Available]	[Not Available]	[Not Available]	[Not Available]	Cervical Squamous Cell Carcinoma	Non-keratinizing squamous cell carcinoma	G2	2012	Biopsy (cervical / CT-guided / Other)	[Not Applicable]
35D677B6-0487-44D3-BBBA-651EAC7E0635	TCGA-EA-A5ZD	5/24/13	YES	NO	Female	Pre (<6 months since LMP AND no prior bilateral ovariectomy AND not on estrogen replacement)	154	47	ASIAN	NOT HISPANIC OR LATINO	Alive	[Not Available]	3	2	[Not Available]	1	[Not Available]	No	[Not Available]	TUMOR FREE	[Not Available]	[Not Available]	[Not Available]	NO	1	[Not Available]	[Not Available]	[Not Available]	[Not Available]	[Not Available]	[Not Available]	[Not Available]	[Not Available]	[Not Applicable]	[Not Available]	40	No	[Not Available]	[Not Available]	[Not Available]	[Not Available]	[Not Available]	[Not Available]	Cervical Squamous Cell Carcinoma	Non-keratinizing squamous cell carcinoma	G2	2012	Biopsy (cervical / CT-guided / Other)	[Not Applicable]
5E39485A-AC6B-496D-9984-2EA8075F6A9B	TCGA-EA-A5ZE	5/24/13	YES	NO	Female	Peri (6-12 months since last menstrual period)	153	55	ASIAN	NOT HISPANIC OR LATINO	Alive	Former User	3	3	[Not Available]	[Not Available]	[Not Available]	No	[Not Available]	TUMOR FREE	[Not Available]	[Not Available]	[Not Available]	NO	1	[Not Available]	[Not Available]	[Not Available]	[Not Available]	[Not Available]	[Not Available]	[Not Available]	[Not Available]	[Not Applicable]	Complete Remission/Response	54	No	[Not Available]	[Not Available]	[Not Available]	[Not Available]	[Not Available]	[Not Available]	Cervical Squamous Cell Carcinoma	Non-keratinizing squamous cell carcinoma	G3	2012	Biopsy (cervical / CT-guided / Other)	[Not Applicable]
0C6BB7DC-45A6-4190-A7C9-B080D49FD58A	TCGA-EA-A5ZF	5/24/13	YES	NO	Female	Peri (6-12 months since last menstrual period)	151	51	ASIAN	NOT HISPANIC OR LATINO	Alive	Former User	3	3	[Not Available]	[Not Available]	[Not Available]	No	[Not Available]	TUMOR FREE	[Not Available]	[Not Available]	[Not Available]	NO	1	[Not Available]	[Not Available]	[Not Available]	[Not Available]	[Not Available]	[Not Available]	[Not Available]	[Not Available]	[Not Applicable]	Complete Remission/Response	56	No	[Not Available]	[Not Available]	[Not Available]	[Not Available]	[Not Available]	[Not Available]	Cervical Squamous Cell Carcinoma	Non-keratinizing squamous cell carcinoma	G2	2012	Biopsy (cervical / CT-guided / Other)	[Not Applicable]
A300DB40-E0B8-4C45-ABBD-D7AA06211E9C	TCGA-EA-A6QX	10/16/13	YES	NO	Female	Peri (6-12 months since last menstrual period)	154	49	ASIAN	NOT HISPANIC OR LATINO	Alive	[Not Available]	4	2	[Not Available]	[Not Available]	[Not Available]	No	2	TUMOR FREE	[Not Available]	[Not Available]	[Not Available]	NO	1	[Not Available]	[Not Available]	[Not Available]	[Not Available]	[Not Available]	[Not Available]	[Not Available]	[Not Available]	[Not Applicable]	[Not Available]	49	No	[Not Available]	[Not Available]	[Not Available]	[Not Available]	[Not Available]	[Not Available]	Cervical Squamous Cell Carcinoma	Non-keratinizing squamous cell carcinoma	G3	2013	Biopsy (cervical / CT-guided / Other)	[Not Applicable]
79AE5209-F476-4D65-A6C0-EBC18D7C8942	TCGA-EA-A78R	11/21/13	YES	NO	Female	Peri (6-12 months since last menstrual period)	160	63	ASIAN	NOT HISPANIC OR LATINO	Alive	[Not Available]	3	3	[Not Available]	[Not Available]	[Not Available]	No	[Not Available]	TUMOR FREE	[Not Available]	[Not Available]	[Not Available]	NO	1	[Not Available]	[Not Available]	[Not Available]	[Not Available]	[Not Available]	[Not Available]	[Not Available]	[Not Available]	[Not Applicable]	[Not Available]	54	No	[Not Available]	[Not Available]	[Not Available]	[Not Available]	[Not Available]	[Not Available]	Cervical Squamous Cell Carcinoma	Non-keratinizing squamous cell carcinoma	G2	2013	Biopsy (cervical / CT-guided / Other)	[Not Applicable]
87E701AB-ACFD-45F2-A12E-323C94E5F3D5	TCGA-EA-A97N	4/18/14	YES	NO	Female	Pre (<6 months since LMP AND no prior bilateral ovariectomy AND not on estrogen replacement)	160	60	WHITE	NOT HISPANIC OR LATINO	Alive	Never Used	5	2	[Not Available]	[Not Available]	[Not Available]	No	3	TUMOR FREE	[Not Available]	[Not Available]	[Not Available]	NO	1	[Not Available]	[Not Available]	[Not Available]	[Not Available]	[Not Available]	1	[Not Available]	Preoperative	[Not Applicable]	Complete Remission/Response	38	No	[Not Available]	[Not Available]	[Not Available]	[Not Available]	[Not Available]	[Not Available]	Cervical Squamous Cell Carcinoma	Non-keratinizing squamous cell carcinoma	G2	2013	Biopsy (cervical / CT-guided / Other)	[Not Applicable]
D7F07485-522A-49D9-B105-5A9A51ACA8F7	TCGA-EK-A2GZ	2011/8/11	NO	YES	Female	Post (prior bilateral ovariectomy OR >12 mo since LMP with no prior hysterectomy)	160	64	BLACK OR AFRICAN AMERICAN	NOT HISPANIC OR LATINO	Alive	[Not Available]	5	5	[Not Available]	[Not Available]	[Not Available]	No	[Not Available]	WITH TUMOR	[Not Available]	[Not Available]	[Not Available]	[Not Available]	[Not Available]	[Not Available]	[Not Available]	[Not Available]	[Not Available]	[Not Available]	0	[Not Available]	Preoperative	[Not Applicable]	[Not Available]	64	Yes	[Not Available]	[Not Available]	[Not Available]	[Not Available]	[Not Available]	[Not Available]	Cervical Squamous Cell Carcinoma	Non-keratinizing squamous cell carcinoma	G2	2008	Biopsy (cervical / CT-guided / Other)	[Not Applicable]
C83C52F4-3815-4F49-8218-CF80AAA62E2F	TCGA-EK-A2H0	2011/3/11	NO	YES	Female	Pre (<6 months since LMP AND no prior bilateral ovariectomy AND not on estrogen replacement)	156	88	WHITE	[Not Available]	Alive	[Not Available]	0	0	[Not Available]	[Not Available]	[Not Available]	No	[Not Available]	TUMOR FREE	[Not Available]	[Not Available]	[Not Available]	[Not Available]	[Not Available]	[Not Available]	[Not Available]	[Not Available]	[Not Available]	[Not Available]	0	[Not Available]	Preoperative	[Not Applicable]	[Not Available]	24	No	[Not Available]	[Not Available]	[Not Available]	[Not Available]	[Not Available]	[Not Available]	Cervical Squamous Cell Carcinoma	Non-keratinizing squamous cell carcinoma	G3	2007	Biopsy (cervical / CT-guided / Other)	[Not Applicable]
690A7B2A-7DC5-4504-9372-70C8B55E81C7	TCGA-EK-A2H1	2011/3/11	NO	YES	Female	Pre (<6 months since LMP AND no prior bilateral ovariectomy AND not on estrogen replacement)	160	62	WHITE	[Not Available]	Alive	[Not Available]	[Not Available]	[Not Available]	[Not Available]	[Not Available]	[Not Available]	No	[Not Available]	TUMOR FREE	[Not Available]	[Not Available]	[Not Available]	[Not Available]	[Not Available]	[Not Available]	[Not Available]	[Not Available]	[Not Available]	[Not Available]	0	[Not Available]	Preoperative	[Not Applicable]	[Not Available]	20	No	[Not Available]	[Not Available]	[Not Available]	[Not Available]	[Not Available]	[Not Available]	Cervical Squamous Cell Carcinoma	Non-keratinizing squamous cell carcinoma	G3	2007	Other method, specify:	Endocervical curettage, cervical cone biopsy
76B54726-D348-4A1B-AE26-5B08D2EFFC9D	TCGA-EK-A2IP	2011/4/11	NO	YES	Female	[Not Available]	167	69	WHITE	[Not Available]	Alive	[Not Available]	2	1	[Not Available]	1	[Not Available]	No	[Not Available]	[Not Available]	[Not Available]	[Not Available]	[Not Available]	[Not Available]	[Not Available]	[Not Available]	[Not Available]	[Not Available]	[Not Available]	[Not Available]	0	[Not Available]	Preoperative	[Not Applicable]	[Not Available]	28	No	[Not Available]	[Not Available]	[Not Available]	[Not Available]	[Not Available]	[Not Available]	Cervical Squamous Cell Carcinoma	Non-keratinizing squamous cell carcinoma	G3	2006	Biopsy (cervical / CT-guided / Other)	[Not Applicable]
A04CB81E-53BD-4686-9626-52EE87E3E261	TCGA-EK-A2IR	2011/8/11	NO	YES	Female	[Not Available]	160	61	WHITE	[Not Available]	Alive	[Not Available]	1	1	[Not Available]	[Not Available]	[Not Available]	No	[Not Available]	TUMOR FREE	[Not Available]	[Not Available]	[Not Available]	[Not Available]	[Not Available]	[Not Available]	[Not Available]	[Not Available]	18	[Not Available]	0	[Not Available]	Preoperative	[Not Applicable]	[Not Available]	48	No	[Not Available]	[Not Available]	[Not Available]	[Not Available]	[Not Available]	[Not Available]	Cervical Squamous Cell Carcinoma	Keratinizing squamous cell carcinoma	G3	1997	Other method, specify:	Retroperitoneal pelvic and para-aortic lymph node dissection, radical hysterectomy and BSO.
5194A247-CFEE-4C11-9475-CF5521A8C6E3	TCGA-EK-A2PG	2012/12/11	NO	YES	Female	Post (prior bilateral ovariectomy OR >12 mo since LMP with no prior hysterectomy)	155	55	BLACK OR AFRICAN AMERICAN	[Not Available]	Alive	[Not Available]	[Not Available]	[Not Available]	[Not Available]	[Not Available]	[Not Available]	No	[Not Available]	[Not Available]	[Not Available]	[Not Available]	[Not Available]	[Not Available]	[Not Available]	[Not Available]	[Not Available]	[Not Available]	[Not Available]	[Not Available]	4	[Not Available]	Preoperative	[Not Applicable]	[Not Available]	88	No	[Not Available]	[Not Available]	[Not Available]	[Not Available]	[Not Available]	[Not Available]	Cervical Squamous Cell Carcinoma	[Not Available]	G3	2005	Biopsy (cervical / CT-guided / Other)	[Not Applicable]
BFD82578-8B60-4C23-85A1-FC14A1CF5F12	TCGA-EK-A2PI	2012/1/11	NO	YES	Female	[Not Available]	162	53	WHITE	[Not Available]	Alive	[Not Available]	[Not Available]	[Not Available]	[Not Available]	[Not Available]	[Not Available]	No	[Not Available]	WITH TUMOR	[Not Available]	[Not Available]	[Not Available]	[Not Available]	[Not Available]	[Not Available]	[Not Available]	[Not Available]	[Not Available]	[Not Available]	0	[Not Available]	Preoperative	[Not Applicable]	[Not Available]	44	No	[Not Available]	[Not Available]	[Not Available]	[Not Available]	[Not Available]	[Not Available]	Cervical Squamous Cell Carcinoma	[Not Available]	G2	2009	Biopsy (cervical / CT-guided / Other)	[Not Applicable]
0809BA8B-4AB6-4F43-934C-C1CCBC014A7E	TCGA-EK-A2PK	2012/8/11	NO	YES	Female	Indeterminate (neither Pre or Postmenopausal)	167	94	WHITE	NOT HISPANIC OR LATINO	Alive	[Not Available]	[Not Available]	[Not Available]	[Not Available]	[Not Available]	[Not Available]	No	[Not Available]	TUMOR FREE	[Not Available]	[Not Available]	[Not Available]	[Not Available]	[Not Available]	[Not Available]	[Not Available]	[Not Available]	[Not Available]	[Not Available]	1	[Not Available]	Preoperative	[Not Applicable]	[Not Available]	43	No	[Not Available]	[Not Available]	[Not Available]	[Not Available]	[Not Available]	[Not Available]	Cervical Squamous Cell Carcinoma	Non-keratinizing squamous cell carcinoma	G3	2006	Other method, specify:	Radical Hysterectomy
45CADCF3-EA98-4063-9255-5C18D6A5CBAB	TCGA-EK-A2PL	2012/2/11	NO	YES	Female	[Not Available]	167	113	WHITE	[Not Available]	Alive	[Not Available]	6	3	[Not Available]	[Not Available]	[Not Available]	No	[Not Available]	WITH TUMOR	[Not Available]	[Not Available]	[Not Available]	[Not Available]	[Not Available]	[Not Available]	[Not Available]	[Not Available]	[Not Available]	[Not Available]	0	[Not Available]	Preoperative	[Not Applicable]	[Not Available]	36	No	[Not Available]	[Not Available]	[Not Available]	[Not Available]	[Not Available]	[Not Available]	Cervical Squamous Cell Carcinoma	Non-keratinizing squamous cell carcinoma	[Not Available]	2008	Biopsy (cervical / CT-guided / Other)	[Not Applicable]
085FB6D8-6265-484E-9307-8292386714B7	TCGA-EK-A2PM	2012/2/11	NO	YES	Female	Post (prior bilateral ovariectomy OR >12 mo since LMP with no prior hysterectomy)	157	51	WHITE	[Not Available]	Alive	[Not Available]	3	3	[Not Available]	[Not Available]	[Not Available]	No	[Not Available]	WITH TUMOR	[Not Available]	[Not Available]	[Not Available]	[Not Available]	[Not Available]	[Not Available]	[Not Available]	[Not Available]	[Not Available]	[Not Available]	0	[Not Available]	Preoperative	[Not Applicable]	[Not Available]	81	No	[Not Available]	[Not Available]	[Not Available]	[Not Available]	[Not Available]	[Not Available]	Cervical Squamous Cell Carcinoma	Keratinizing squamous cell carcinoma	G3	2008	Biopsy (cervical / CT-guided / Other)	[Not Applicable]
D7A75BF5-5189-4978-99D9-FCEF91C9FBD2	TCGA-EK-A2R7	2012/2/11	NO	YES	Female	Pre (<6 months since LMP AND no prior bilateral ovariectomy AND not on estrogen replacement)	165	75	WHITE	NOT HISPANIC OR LATINO	Alive	Current User	2	2	[Not Available]	[Not Available]	[Not Available]	No	[Not Available]	TUMOR FREE	[Not Available]	[Not Available]	[Not Available]	[Not Available]	[Not Available]	[Not Available]	[Not Available]	[Not Available]	[Not Available]	[Not Available]	0	[Not Available]	Preoperative	[Not Applicable]	[Not Available]	45	No	[Not Available]	[Not Available]	[Not Available]	[Not Available]	[Not Available]	[Not Available]	Cervical Squamous Cell Carcinoma	[Not Available]	G3	2010	Biopsy (cervical / CT-guided / Other)	[Not Applicable]
D4510801-8CE4-4F10-8B31-25C0A39B5135	TCGA-EK-A2R8	2012/2/11	NO	YES	Female	Pre (<6 months since LMP AND no prior bilateral ovariectomy AND not on estrogen replacement)	170	75	WHITE	NOT HISPANIC OR LATINO	Alive	[Not Available]	5	5	[Not Available]	[Not Available]	[Not Available]	No	[Not Available]	WITH TUMOR	[Not Available]	[Not Available]	[Not Available]	[Not Available]	[Not Available]	[Not Available]	[Not Available]	[Not Available]	[Not Available]	[Not Available]	0	[Not Available]	Preoperative	[Not Applicable]	[Not Available]	48	No	[Not Available]	[Not Available]	[Not Available]	[Not Available]	[Not Available]	[Not Available]	Cervical Squamous Cell Carcinoma	Keratinizing squamous cell carcinoma	G3	2010	Biopsy (cervical / CT-guided / Other)	[Not Applicable]
00AD0FFE-2105-4829-A495-1C2ACEB5BB31	TCGA-EK-A2R9	2012/7/11	NO	YES	Female	[Not Available]	162	185	WHITE	NOT HISPANIC OR LATINO	Alive	[Not Available]	[Not Available]	[Not Available]	[Not Available]	[Not Available]	[Not Available]	No	[Not Available]	WITH TUMOR	[Not Available]	[Not Available]	[Not Available]	[Not Available]	[Not Available]	[Not Available]	[Not Available]	[Not Available]	[Not Available]	[Not Available]	0	[Not Available]	Preoperative	[Not Applicable]	[Not Available]	58	No	[Not Available]	[Not Available]	[Not Available]	[Not Available]	[Not Available]	[Not Available]	Cervical Squamous Cell Carcinoma	[Not Available]	G3	2011	Other method, specify:	Radical Total Abdominal Hysterectomy and BSO
ADA77320-FD05-4E43-BE72-864391044B35	TCGA-EK-A2RA	2001/4/12	NO	YES	Female	[Not Available]	160	72	[Not Available]	HISPANIC OR LATINO	Alive	[Not Available]	[Not Available]	[Not Available]	[Not Available]	[Not Available]	[Not Available]	No	[Not Available]	WITH TUMOR	[Not Available]	[Not Available]	[Not Available]	[Not Available]	4	41	2010	[Not Available]	[Not Available]	[Not Available]	0	[Not Available]	Preoperative	[Not Applicable]	[Not Available]	74	No	[Not Available]	[Not Available]	[Not Available]	[Not Available]	[Not Available]	[Not Available]	Cervical Squamous Cell Carcinoma	Non-keratinizing squamous cell carcinoma	G3	2011	Other method, specify:	aortic and pelvic lymphadenectomy, total abdominal hysterectomy and BSO.
F92A994D-B080-42C9-966F-34C1000865E3	TCGA-EK-A2RB	2012/7/11	NO	YES	Female	[Not Available]	175	105	WHITE	NOT HISPANIC OR LATINO	Alive	[Not Available]	[Not Available]	[Not Available]	[Not Available]	[Not Available]	[Not Available]	No	[Not Available]	TUMOR FREE	[Not Available]	[Not Available]	[Not Available]	[Not Available]	2	[Not Available]	[Not Available]	[Not Available]	[Not Available]	[Not Available]	0	[Not Available]	Other	post-op	[Not Available]	48	No	[Not Available]	[Not Available]	[Not Available]	[Not Available]	[Not Available]	[Not Available]	Cervical Squamous Cell Carcinoma	[Not Available]	G3	2011	Other method, specify:	Cervical biopsies and cystoscopy
AC0AE100-8072-47CC-81D9-8B52B1BF9236	TCGA-EK-A2RC	2012/7/11	NO	YES	Female	[Not Available]	170	72	[Not Available]	[Not Available]	Alive	[Not Available]	4	3	[Not Available]	[Not Available]	[Not Available]	No	[Not Available]	TUMOR FREE	[Not Available]	[Not Available]	[Not Available]	NO	[Not Available]	[Not Available]	[Not Available]	[Not Available]	[Not Available]	[Not Available]	0	[Not Available]	Preoperative	[Not Applicable]	[Not Available]	33	No	[Not Available]	[Not Available]	[Not Available]	[Not Available]	[Not Available]	[Not Available]	Cervical Squamous Cell Carcinoma	[Not Available]	G3	2009	Other method, specify:	Biopsy and endocervical curettage
16363EF7-899D-4927-A74B-E7C03B3D8AF1	TCGA-EK-A2RD	2012/5/11	NO	YES	Female	Post (prior bilateral ovariectomy OR >12 mo since LMP with no prior hysterectomy)	161	114	AMERICAN INDIAN OR ALASKA NATIVE	NOT HISPANIC OR LATINO	Alive	[Not Available]	2	2	[Not Available]	[Not Available]	[Not Available]	No	[Not Available]	TUMOR FREE	[Not Available]	[Not Available]	[Not Available]	[Not Available]	[Not Available]	[Not Available]	[Not Available]	[Not Available]	[Not Available]	[Not Available]	0	[Not Available]	Preoperative	[Not Applicable]	[Not Available]	47	No	[Not Available]	[Not Available]	[Not Available]	[Not Available]	[Not Available]	[Not Available]	Cervical Squamous Cell Carcinoma	Non-keratinizing squamous cell carcinoma	G2	2009	Other method, specify:	Biopsy, Robotic Hysterectomy, BSO, Pelvic and periaortic LN dissection.
9AA36AC2-8418-4109-A3C1-63CA8742BAAB	TCGA-EK-A2RE	2012/5/11	NO	YES	Female	Pre (<6 months since LMP AND no prior bilateral ovariectomy AND not on estrogen replacement)	161	54	WHITE	NOT HISPANIC OR LATINO	Alive	[Not Available]	[Not Available]	[Not Available]	[Not Available]	[Not Available]	[Not Available]	No	[Not Available]	TUMOR FREE	[Not Available]	[Not Available]	[Not Available]	[Not Available]	[Not Available]	[Not Available]	[Not Available]	[Not Available]	[Not Available]	[Not Available]	0	[Not Available]	Preoperative	[Not Applicable]	[Not Available]	26	No	[Not Available]	[Not Available]	[Not Available]	[Not Available]	[Not Available]	[Not Available]	Cervical Squamous Cell Carcinoma	Keratinizing squamous cell carcinoma	G2	2010	Other method, specify:	laparoscopic-assisted radical vaginal trachelectomy with pelvic periaortic lymph node dissection and cerclage
CCD569E9-DCBE-4280-8C21-6BFE4CE60D7A	TCGA-EK-A2RJ	2012/2/11	NO	YES	Female	[Not Available]	162	85	WHITE	NOT HISPANIC OR LATINO	Alive	[Not Available]	1	1	[Not Available]	[Not Available]	[Not Available]	No	[Not Available]	TUMOR FREE	[Not Available]	[Not Available]	[Not Available]	[Not Available]	[Not Available]	[Not Available]	[Not Available]	[Not Available]	[Not Available]	[Not Available]	0	[Not Available]	Preoperative	[Not Applicable]	[Not Available]	51	No	[Not Available]	[Not Available]	[Not Available]	[Not Available]	[Not Available]	[Not Available]	Cervical Squamous Cell Carcinoma	Non-keratinizing squamous cell carcinoma	G3	2009	Biopsy (cervical / CT-guided / Other)	[Not Applicable]
ACBFEB99-2B6B-4232-9AB5-A58549C6BC3A	TCGA-EK-A2RK	2012/2/11	NO	YES	Female	Post (prior bilateral ovariectomy OR >12 mo since LMP with no prior hysterectomy)	165	101	WHITE	NOT HISPANIC OR LATINO	Alive	[Not Available]	2	1	[Not Available]	1	[Not Available]	No	[Not Available]	[Not Available]	[Not Available]	[Not Available]	[Not Available]	[Not Available]	[Not Available]	[Not Available]	[Not Available]	[Not Available]	[Not Available]	[Not Available]	0	[Not Available]	Preoperative	[Not Applicable]	[Not Available]	67	No	[Not Available]	[Not Available]	[Not Available]	[Not Available]	[Not Available]	[Not Available]	Cervical Squamous Cell Carcinoma	Non-keratinizing squamous cell carcinoma	G3	2009	Other method, specify:	Radical hysterectomy, BSO, bilateral pelvic lymphadenectomy
61EB08D0-EA01-45E7-884B-AC3D6070172A	TCGA-EK-A2RL	2012/1/11	NO	YES	Female	[Not Available]	154	89	BLACK OR AFRICAN AMERICAN	NOT HISPANIC OR LATINO	Dead	[Not Available]	[Not Available]	[Not Available]	[Not Available]	[Not Available]	[Not Available]	No	[Not Available]	TUMOR FREE	[Not Available]	[Not Available]	[Not Available]	[Not Available]	[Not Available]	[Not Available]	[Not Available]	[Not Available]	[Not Available]	[Not Available]	0	[Not Available]	Preoperative	[Not Applicable]	[Not Available]	32	No	[Not Available]	[Not Available]	[Not Available]	[Not Available]	[Not Available]	[Not Available]	Endocervical Type of Adenocarcinoma	[Not Available]	G2	2009	Other method, specify:	biopsy and endocervical curettage
C13215D9-26A8-4C8B-B4FE-5DA6AA3222AF	TCGA-EK-A2RM	2012/1/11	NO	YES	Female	[Not Available]	167	105	WHITE	NOT HISPANIC OR LATINO	Alive	[Not Available]	4	4	[Not Available]	[Not Available]	[Not Available]	No	[Not Available]	WITH TUMOR	[Not Available]	[Not Available]	[Not Available]	[Not Available]	[Not Available]	[Not Available]	[Not Available]	[Not Available]	[Not Available]	[Not Available]	1	[Not Available]	Preoperative	[Not Applicable]	[Not Available]	40	No	[Not Available]	[Not Available]	[Not Available]	[Not Available]	[Not Available]	[Not Available]	Cervical Squamous Cell Carcinoma	[Not Available]	G3	2009	Other method, specify:	Radical Hysterectomy, BSO
B610D391-0C9D-4114-94D6-5E4AA4270122	TCGA-EK-A2RN	2012/5/11	NO	YES	Female	Post (prior bilateral ovariectomy OR >12 mo since LMP with no prior hysterectomy)	176	68	WHITE	NOT HISPANIC OR LATINO	Alive	[Not Available]	1	0	[Not Available]	[Not Available]	[Not Available]	No	1	WITH TUMOR	[Not Available]	[Not Available]	[Not Available]	[Not Available]	[Not Available]	[Not Available]	[Not Available]	[Not Available]	[Not Available]	[Not Available]	0	[Not Available]	Preoperative	[Not Applicable]	[Not Available]	45	No	[Not Available]	[Not Available]	[Not Available]	[Not Available]	[Not Available]	[Not Available]	Cervical Squamous Cell Carcinoma	Keratinizing squamous cell carcinoma	G2	2009	Cone Biopsy / LEEP	[Not Applicable]
C996CFFB-8132-4973-987D-143274B6A081	TCGA-EK-A2RO	2012/5/11	NO	YES	Female	Post (prior bilateral ovariectomy OR >12 mo since LMP with no prior hysterectomy)	168	77	AMERICAN INDIAN OR ALASKA NATIVE	HISPANIC OR LATINO	Alive	[Not Available]	[Not Available]	[Not Available]	[Not Available]	[Not Available]	[Not Available]	No	[Not Available]	WITH TUMOR	[Not Available]	[Not Available]	[Not Available]	[Not Available]	[Not Available]	[Not Available]	[Not Available]	[Not Available]	[Not Available]	[Not Available]	0	[Not Available]	Preoperative	[Not Applicable]	[Not Available]	59	No	[Not Available]	[Not Available]	[Not Available]	[Not Available]	[Not Available]	[Not Available]	Cervical Squamous Cell Carcinoma	Keratinizing squamous cell carcinoma	G1	2010	Lymph node sampling or dissection	[Not Applicable]
DEDA68DD-E9AD-45CC-9DBB-1C5836EF6519	TCGA-EK-A3GJ	2002/3/12	NO	YES	Female	[Not Available]	171	96	NATIVE HAWAIIAN OR OTHER PACIFIC ISLANDER	[Not Available]	Alive	[Not Available]	10	6	[Not Available]	[Not Available]	[Not Available]	No	[Not Available]	[Discrepancy]	[Not Available]	[Not Available]	[Not Available]	[Not Available]	[Not Available]	[Not Available]	[Not Available]	[Not Available]	[Not Available]	[Not Available]	1	[Not Available]	Preoperative	[Not Applicable]	[Not Available]	51	No	[Not Available]	[Not Available]	[Not Available]	[Not Available]	[Not Available]	[Not Available]	Cervical Squamous Cell Carcinoma	Keratinizing squamous cell carcinoma	G3	2010	Other method, specify:	Radical hysterectomy with bso and pnd
D07D0A56-A25E-426B-8384-9D49E6545527	TCGA-EK-A3GK	2002/2/12	NO	YES	Female	[Not Available]	165	73	WHITE	NOT HISPANIC OR LATINO	Alive	Current User	0	0	[Not Available]	[Not Available]	[Not Available]	No	[Not Available]	TUMOR FREE	[Not Available]	[Not Available]	[Not Available]	[Not Available]	[Not Available]	[Not Available]	[Not Available]	[Not Available]	[Not Available]	[Not Available]	0	[Not Available]	Preoperative	[Not Applicable]	[Not Available]	33	No	[Not Available]	[Not Available]	[Not Available]	[Not Available]	[Not Available]	[Not Available]	Endocervical Type of Adenocarcinoma	[Not Available]	G3	2009	Other method, specify:	Radical hysterectomy, BSO, Bilateral pelvic LND, upper vaginectomy, omental and cecal biopsy.
CB780C10-8810-4384-B829-954AAB1C16C8	TCGA-EK-A3GM	2002/2/12	NO	YES	Female	Post (prior bilateral ovariectomy OR >12 mo since LMP with no prior hysterectomy)	150	83	WHITE	HISPANIC OR LATINO	Alive	[Not Available]	10	10	[Not Available]	[Not Available]	[Not Available]	No	[Not Available]	[Not Available]	[Not Available]	[Not Available]	[Not Available]	[Not Available]	1	[Not Available]	[Not Available]	[Not Available]	[Not Available]	[Not Available]	0	[Not Available]	Preoperative	[Not Applicable]	[Not Available]	65	No	[Not Available]	[Not Available]	[Not Available]	[Not Available]	[Not Available]	[Not Available]	Endocervical Type of Adenocarcinoma	[Not Available]	G2	2006	Biopsy (cervical / CT-guided / Other)	[Not Applicable]
F727FCB9-E457-4643-9468-F739133B7E9C	TCGA-EK-A3GN	2002/2/12	NO	YES	Female	[Not Available]	160	83	WHITE	NOT HISPANIC OR LATINO	Alive	[Not Available]	[Not Available]	[Not Available]	[Not Available]	[Not Available]	[Not Available]	No	[Not Available]	WITH TUMOR	[Not Available]	[Not Available]	[Not Available]	[Not Available]	[Not Available]	[Not Available]	[Not Available]	[Not Available]	[Not Available]	[Not Available]	1	[Not Available]	Preoperative	[Not Applicable]	[Not Available]	47	No	[Not Available]	[Not Available]	[Not Available]	[Not Available]	[Not Available]	[Not Available]	Cervical Squamous Cell Carcinoma	[Not Available]	G3	2005	Biopsy (cervical / CT-guided / Other)	[Not Applicable]
6b74c07a-9932-4a80-8296-9db08d0c6964	TCGA-EX-A1H5	4/21/11	YES	NO	Female	Post (prior bilateral ovariectomy OR >12 mo since LMP with no prior hysterectomy)	167	67	BLACK OR AFRICAN AMERICAN	NOT HISPANIC OR LATINO	Alive	Never Used	4	4	[Not Available]	[Not Available]	[Not Available]	No	[Not Available]	TUMOR FREE	[Not Available]	[Not Available]	[Not Available]	[Not Available]	2	33	[Not Available]	[Not Available]	12	[Not Available]	[Not Available]	[Not Available]	[Not Available]	[Not Applicable]	[Not Available]	58	No	[Not Available]	[Not Available]	[Not Available]	[Not Available]	[Not Available]	[Not Available]	Cervical Squamous Cell Carcinoma	Non-keratinizing squamous cell carcinoma	G3	2010	Cone Biopsy / LEEP	[Not Applicable]
1FE594D9-4240-49EE-8AFD-C7D16A377181	TCGA-EX-A1H6	6/25/12	NO	YES	Female	Pre (<6 months since LMP AND no prior bilateral ovariectomy AND not on estrogen replacement)	158	74	WHITE	[Not Available]	Alive	Current User	3	2	[Not Available]	[Not Available]	[Not Available]	No	1	TUMOR FREE	[Not Available]	[Not Available]	[Not Available]	NO	1	[Not Available]	[Not Available]	[Not Available]	[Not Available]	[Not Available]	[Not Available]	[Not Available]	[Not Available]	[Not Applicable]	Complete Remission/Response	38	No	[Not Available]	[Not Available]	[Not Available]	[Not Available]	[Not Available]	[Not Available]	Endocervical Type of Adenocarcinoma	[Not Available]	G1	2009	Cone Biopsy / LEEP	[Not Applicable]
F5D90810-8C4B-4CED-9360-383E42CB54B3	TCGA-EX-A3L1	4/19/12	YES	NO	Female	Pre (<6 months since LMP AND no prior bilateral ovariectomy AND not on estrogen replacement)	160	57	WHITE	NOT HISPANIC OR LATINO	Alive	Current User	3	3	[Not Available]	[Not Available]	[Not Available]	No	[Not Available]	TUMOR FREE	[Not Available]	[Not Available]	[Not Available]	NO	1	[Not Available]	[Not Available]	[Not Available]	[Not Available]	[Not Available]	[Not Available]	[Not Available]	[Not Available]	[Not Applicable]	[Not Available]	32	No	[Not Available]	[Not Available]	[Not Available]	[Not Available]	[Not Available]	[Not Available]	Cervical Squamous Cell Carcinoma	Non-keratinizing squamous cell carcinoma	G3	2011	Biopsy (cervical / CT-guided / Other)	[Not Applicable]
EB0EB159-732E-43FF-A402-7F2D9F67DAA8	TCGA-EX-A449	2011/1/12	YES	NO	Female	Pre (<6 months since LMP AND no prior bilateral ovariectomy AND not on estrogen replacement)	168	107	WHITE	NOT HISPANIC OR LATINO	Alive	[Not Available]	3	1	[Not Available]	[Not Available]	[Not Available]	No	1	WITH TUMOR	[Not Available]	1	[Not Available]	NO	[Not Available]	[Not Available]	[Not Available]	[Not Available]	[Not Available]	[Not Available]	[Not Available]	[Not Available]	[Not Available]	[Not Applicable]	[Not Applicable]	42	Yes	[Not Available]	[Not Available]	[Not Available]	[Not Available]	[Not Available]	[Not Available]	Endocervical Type of Adenocarcinoma	[Not Available]	G1	2012	Other method, specify:	Total Abdominal Hysterectomy
6DCA2A6F-7F2C-4524-B528-396A889B2A3F	TCGA-EX-A69L	6/19/13	YES	NO	Female	Pre (<6 months since LMP AND no prior bilateral ovariectomy AND not on estrogen replacement)	163	73	ASIAN	NOT HISPANIC OR LATINO	Alive	Never Used	2	1	[Not Available]	1	[Not Available]	No	[Not Available]	TUMOR FREE	[Not Available]	[Not Available]	[Not Available]	NO	1	[Not Available]	[Not Available]	[Not Available]	[Not Available]	[Not Available]	[Not Available]	[Not Available]	[Not Available]	[Not Applicable]	Complete Remission/Response	41	No	[Not Available]	[Not Available]	[Not Available]	[Not Available]	[Not Available]	[Not Available]	Cervical Squamous Cell Carcinoma	Non-keratinizing squamous cell carcinoma	G3	2012	Biopsy (cervical / CT-guided / Other)	[Not Applicable]
1E4D7755-B971-4C6E-A2B9-DD83D92BC4C9	TCGA-EX-A69M	6/19/13	YES	NO	Female	Post (prior bilateral ovariectomy OR >12 mo since LMP with no prior hysterectomy)	158	58	WHITE	[Not Available]	Dead	Never Used	4	3	[Not Available]	[Not Available]	[Not Available]	No	[Not Available]	TUMOR FREE	1	[Not Available]	[Not Available]	NO	4	[Not Available]	2012	[Not Available]	[Not Available]	[Not Available]	1	[Not Available]	Preoperative	[Not Applicable]	Complete Remission/Response	62	Yes	[Not Available]	[Not Available]	[Not Available]	[Not Available]	[Not Available]	[Not Available]	Cervical Squamous Cell Carcinoma	Non-keratinizing squamous cell carcinoma	G3	2012	Cytology (e.g. Peritoneal or pleural fluid)	[Not Applicable]
1DFB4565-81E1-4A1B-BB59-9B5629D6C447	TCGA-EX-A8YF	3/13/14	YES	NO	Female	Pre (<6 months since LMP AND no prior bilateral ovariectomy AND not on estrogen replacement)	168	57	WHITE	[Not Available]	Alive	[Not Available]	3	2	[Not Available]	[Not Available]	[Not Available]	No	[Not Available]	TUMOR FREE	[Not Available]	[Not Available]	[Not Available]	NO	1	[Not Available]	[Not Available]	[Not Available]	[Not Available]	[Not Available]	[Not Available]	[Not Available]	[Not Available]	[Not Applicable]	Complete Remission/Response	44	No	[Not Available]	[Not Available]	[Not Available]	[Not Available]	[Not Available]	[Not Available]	Cervical Squamous Cell Carcinoma	Non-keratinizing squamous cell carcinoma	G3	2013	Biopsy (cervical / CT-guided / Other)	[Not Applicable]
85abfd69-cf72-43f6-a7dd-97056f22c91b	TCGA-FU-A23K	7/18/11	NO	YES	Female	Pre (<6 months since LMP AND no prior bilateral ovariectomy AND not on estrogen replacement)	165	91	WHITE	[Not Available]	Alive	[Not Available]	2	2	[Not Available]	[Not Available]	[Not Available]	No	[Not Available]	TUMOR FREE	[Not Available]	[Not Available]	[Not Available]	NO	1	[Not Available]	[Not Available]	[Not Available]	[Not Available]	[Not Available]	[Not Available]	[Not Available]	[Not Available]	[Not Applicable]	[Not Available]	28	No	[Not Available]	[Not Available]	[Not Available]	[Not Available]	[Not Available]	[Not Available]	Cervical Squamous Cell Carcinoma	Non-keratinizing squamous cell carcinoma	G3	2010	Biopsy (cervical / CT-guided / Other)	[Not Applicable]
86731af9-2d33-4521-9cf9-5f6152ca15d7	TCGA-FU-A23L	7/18/11	NO	YES	Female	Post (prior bilateral ovariectomy OR >12 mo since LMP with no prior hysterectomy)	163	56	WHITE	[Not Available]	Alive	[Not Available]	[Not Available]	4	[Not Available]	[Not Available]	[Not Available]	No	[Not Available]	[Not Available]	[Not Available]	[Not Available]	[Not Available]	NO	1	[Not Available]	[Not Available]	[Not Available]	[Not Available]	[Not Available]	[Not Available]	[Not Available]	[Not Available]	[Not Applicable]	[Not Available]	60	No	[Not Available]	[Not Available]	[Not Available]	[Not Available]	[Not Available]	[Not Available]	Cervical Squamous Cell Carcinoma	[Not Available]	G3	2010	Biopsy (cervical / CT-guided / Other)	[Not Applicable]
D5D8A818-D689-4C6F-96B0-13F2CB10C3CA	TCGA-FU-A2QG	10/18/11	YES	NO	Female	Peri (6-12 months since last menstrual period)	170	138	WHITE	NOT HISPANIC OR LATINO	Alive	Former User	1	1	[Not Available]	0	[Not Available]	No	0	TUMOR FREE	0	0	[Not Available]	NO	4	14	2011	[Not Available]	15	[Not Available]	1	[Not Available]	Preoperative	[Not Applicable]	[Not Available]	29	No	[Not Available]	[Not Available]	[Not Available]	[Not Available]	[Not Available]	[Not Available]	Cervical Squamous Cell Carcinoma	Keratinizing squamous cell carcinoma	G2	2011	Biopsy (cervical / CT-guided / Other)	[Not Applicable]
B7F2958F-256E-4C30-9C61-11E76DDB36BA	TCGA-FU-A3EO	2/15/12	YES	NO	Female	Post (prior bilateral ovariectomy OR >12 mo since LMP with no prior hysterectomy)	165	64	WHITE	NOT HISPANIC OR LATINO	Alive	Former User	2	2	[Not Available]	0	[Not Available]	No	0	TUMOR FREE	0	0	[Not Available]	NO	2	15	[Not Available]	[Not Available]	40	[Not Available]	1	[Not Available]	Preoperative	[Not Applicable]	[Not Available]	55	No	[Not Available]	[Not Available]	[Not Available]	[Not Available]	[Not Available]	[Not Available]	Endocervical Type of Adenocarcinoma	[Not Available]	G2	2011	Biopsy (cervical / CT-guided / Other)	[Not Applicable]
674E010C-7AD4-4DC2-86B0-284CD4560633	TCGA-FU-A3HY	4/16/12	YES	NO	Female	Pre (<6 months since LMP AND no prior bilateral ovariectomy AND not on estrogen replacement)	170	74	WHITE	NOT HISPANIC OR LATINO	Alive	Former User	6	6	[Not Available]	0	[Not Available]	No	0	TUMOR FREE	0	0	[Not Available]	NO	2	16	[Not Available]	[Not Available]	5	[Not Available]	[Not Available]	[Not Available]	[Not Available]	[Not Applicable]	[Not Available]	47	No	[Not Available]	[Not Available]	[Not Available]	[Not Available]	[Not Available]	[Not Available]	Cervical Squamous Cell Carcinoma	Non-keratinizing squamous cell carcinoma	G2	2011	Biopsy (cervical / CT-guided / Other)	[Not Applicable]
6FF12A54-10DA-4941-BFEA-7B66E19B4BE9	TCGA-FU-A3HZ	4/16/12	NO	YES	Female	Post (prior bilateral ovariectomy OR >12 mo since LMP with no prior hysterectomy)	165	66	WHITE	NOT HISPANIC OR LATINO	Alive	[Not Available]	0	0	[Not Available]	0	[Not Available]	No	0	TUMOR FREE	0	0	[Not Available]	NO	1	[Not Available]	[Not Available]	[Not Available]	[Not Available]	[Not Available]	[Not Available]	[Not Available]	[Not Available]	[Not Applicable]	[Not Available]	64	No	[Not Available]	[Not Available]	[Not Available]	[Not Available]	[Not Available]	[Not Available]	Cervical Squamous Cell Carcinoma	Non-keratinizing squamous cell carcinoma	G3	2010	Other method, specify:	curettage
DAC27C24-CDBF-4527-9214-178FDE3D098A	TCGA-FU-A3NI	4/17/12	NO	YES	Female	Pre (<6 months since LMP AND no prior bilateral ovariectomy AND not on estrogen replacement)	162	57	WHITE	NOT HISPANIC OR LATINO	Dead	[Not Available]	[Not Available]	2	[Not Available]	[Not Available]	[Not Available]	No	[Not Available]	TUMOR FREE	[Not Available]	[Not Available]	[Not Available]	NO	2	[Not Available]	[Not Available]	[Not Available]	[Not Available]	[Not Available]	[Not Available]	[Not Available]	[Not Available]	[Not Applicable]	[Not Available]	45	No	[Not Available]	[Not Available]	[Not Available]	[Not Available]	[Not Available]	[Not Available]	Cervical Squamous Cell Carcinoma	Keratinizing squamous cell carcinoma	G2	2010	Biopsy (cervical / CT-guided / Other)	[Not Applicable]
7218AA6F-3345-484F-A329-A3B6169A67C7	TCGA-FU-A3TQ	2008/6/12	NO	YES	Female	Post (prior bilateral ovariectomy OR >12 mo since LMP with no prior hysterectomy)	152	59	WHITE	NOT HISPANIC OR LATINO	Alive	[Not Available]	3	3	[Not Available]	0	[Not Available]	No	0	TUMOR FREE	0	0	[Not Available]	NO	2	30	[Not Available]	[Not Available]	50	[Not Available]	[Not Available]	[Not Available]	[Not Available]	[Not Applicable]	[Not Available]	55	No	[Not Available]	[Not Available]	[Not Available]	[Not Available]	[Not Available]	[Not Available]	Cervical Squamous Cell Carcinoma	Non-keratinizing squamous cell carcinoma	G2	2010	Cone Biopsy / LEEP	[Not Applicable]
B75644C2-B515-41CE-9B03-842EF5208A17	TCGA-FU-A3TX	2008/6/12	YES	NO	Female	Post (prior bilateral ovariectomy OR >12 mo since LMP with no prior hysterectomy)	[Not Available]	67	[Not Available]	[Not Available]	Alive	[Not Available]	3	3	[Not Available]	[Not Available]	[Not Available]	No	[Not Available]	[Not Available]	[Not Available]	[Not Available]	[Not Available]	NO	4	20	1993	[Not Available]	[Not Available]	[Not Available]	[Not Available]	[Not Available]	[Not Available]	[Not Applicable]	[Not Available]	78	Yes	[Not Available]	[Not Available]	[Not Available]	[Not Available]	[Not Available]	[Not Available]	Cervical Squamous Cell Carcinoma	Keratinizing squamous cell carcinoma	G3	2012	Cytology (e.g. Peritoneal or pleural fluid)	[Not Applicable]
6868BA1D-B612-454C-8146-74AF2F573D76	TCGA-FU-A3WB	9/24/12	YES	NO	Female	[Not Available]	167	89	WHITE	NOT HISPANIC OR LATINO	Alive	Former User	3	1	[Not Available]	[Not Available]	[Not Available]	No	[Not Available]	TUMOR FREE	[Not Available]	[Not Available]	[Not Available]	NO	4	16	2012	[Not Available]	25	[Not Available]	2	[Not Available]	Preoperative	[Not Applicable]	Complete Remission/Response	43	No	[Not Available]	[Not Available]	[Not Available]	[Not Available]	[Not Available]	[Not Available]	Cervical Squamous Cell Carcinoma	Non-keratinizing squamous cell carcinoma	G2	2012	Other method, specify:	D&C
6E01248B-C551-4F52-8066-CB2D26EB6394	TCGA-FU-A3YQ	2010/4/12	YES	NO	Female	Pre (<6 months since LMP AND no prior bilateral ovariectomy AND not on estrogen replacement)	160	101	WHITE	NOT HISPANIC OR LATINO	Alive	Former User	4	3	[Not Available]	1	[Not Available]	No	[Not Available]	[Not Available]	[Not Available]	[Not Available]	[Not Available]	NO	2	23	[Not Available]	[Not Available]	10	[Not Available]	[Not Available]	[Not Available]	[Not Available]	[Not Applicable]	[Not Available]	35	No	[Not Available]	[Not Available]	[Not Available]	[Not Available]	[Not Available]	[Not Available]	Cervical Squamous Cell Carcinoma	Non-keratinizing squamous cell carcinoma	G1	2012	Biopsy (cervical / CT-guided / Other)	[Not Applicable]
63DCFA32-C69E-45AD-BEA3-AE672ACB11C6	TCGA-FU-A40J	2010/4/12	YES	NO	Female	Pre (<6 months since LMP AND no prior bilateral ovariectomy AND not on estrogen replacement)	160	78	WHITE	NOT HISPANIC OR LATINO	Alive	[Not Available]	3	3	[Not Available]	[Not Available]	[Not Available]	No	[Not Available]	TUMOR FREE	[Not Available]	[Not Available]	[Not Available]	NO	1	[Not Available]	[Not Available]	[Not Available]	[Not Available]	[Not Available]	[Not Available]	[Not Available]	[Not Available]	[Not Applicable]	[Not Available]	38	No	[Not Available]	[Not Available]	[Not Available]	[Not Available]	[Not Available]	[Not Available]	Endocervical Type of Adenocarcinoma	[Not Available]	G3	2012	Biopsy (cervical / CT-guided / Other)	[Not Applicable]
968BD652-786C-4DDB-A937-DC480CB821FC	TCGA-FU-A57G	5/31/13	YES	NO	Female	Pre (<6 months since LMP AND no prior bilateral ovariectomy AND not on estrogen replacement)	160	57	WHITE	NOT HISPANIC OR LATINO	Alive	Former User	3	2	[Not Available]	1	[Not Available]	No	[Not Available]	TUMOR FREE	[Not Available]	[Not Available]	[Not Available]	NO	1	[Not Available]	[Not Available]	[Not Available]	[Not Available]	[Not Available]	1	[Not Available]	Preoperative	[Not Applicable]	[Not Available]	49	No	[Not Available]	[Not Available]	[Not Available]	[Not Available]	[Not Available]	[Not Available]	Endocervical Type of Adenocarcinoma	[Not Available]	G2	2011	Biopsy (cervical / CT-guided / Other)	[Not Applicable]
9DBA5A81-3587-4F5A-8D19-E0B0AED0A677	TCGA-FU-A5XV	2007/12/13	YES	NO	Female	Pre (<6 months since LMP AND no prior bilateral ovariectomy AND not on estrogen replacement)	157	69	WHITE	NOT HISPANIC OR LATINO	Alive	[Not Available]	[Not Available]	2	[Not Available]	[Not Available]	[Not Available]	No	[Not Available]	[Not Available]	1	[Not Available]	[Not Available]	NO	2	14	[Not Available]	[Not Available]	18	[Not Available]	1	[Not Available]	Preoperative	[Not Applicable]	[Not Available]	32	No	[Not Available]	[Not Available]	[Not Available]	[Not Available]	[Not Available]	[Not Available]	Cervical Squamous Cell Carcinoma	Non-keratinizing squamous cell carcinoma	G3	2012	Cone Biopsy / LEEP	[Not Applicable]
128FD280-9A04-4038-9269-9A945B9A4DC9	TCGA-FU-A770	2/26/14	YES	NO	Female	Pre (<6 months since LMP AND no prior bilateral ovariectomy AND not on estrogen replacement)	175	67	WHITE	NOT HISPANIC OR LATINO	Alive	Former User	2	1	[Not Available]	1	[Not Available]	No	0	TUMOR FREE	0	0	[Not Available]	NO	2	16	[Not Available]	[Not Available]	7	[Not Available]	1	[Not Available]	Preoperative	[Not Applicable]	[Not Available]	33	No	[Not Available]	[Not Available]	[Not Available]	[Not Available]	[Not Available]	[Not Available]	Endocervical Adenocarcinoma of the Usual Type	[Not Available]	G2	2013	Other method, specify:	D&C
67195401-9099-4CA9-9790-F42BCB815289	TCGA-GH-A9DA	2005/7/14	YES	NO	Female	[Not Available]	170	[Not Available]	WHITE	NOT HISPANIC OR LATINO	Alive	[Not Available]	5	3	[Not Available]	2	[Not Available]	No	[Not Available]	TUMOR FREE	[Not Available]	[Not Available]	[Not Available]	NO	2	14	[Not Available]	[Not Available]	6.5	[Not Available]	[Not Available]	[Not Available]	[Not Available]	[Not Applicable]	Complete Remission/Response	27	No	[Not Available]	[Not Available]	[Not Available]	[Not Available]	[Not Available]	[Not Available]	Cervical Squamous Cell Carcinoma	Non-keratinizing squamous cell carcinoma	G3	2013	Biopsy (cervical / CT-guided / Other)	[Not Applicable]
E2FF7CFD-A101-45B9-895F-26F403E7BDFB	TCGA-HG-A2PA	12/23/11	NO	YES	Female	Pre (<6 months since LMP AND no prior bilateral ovariectomy AND not on estrogen replacement)	164	95	WHITE	NOT HISPANIC OR LATINO	Dead	[Not Available]	5	4	[Not Available]	1	[Not Available]	No	0	WITH TUMOR	0	0	[Not Available]	NO	2	[Not Available]	[Not Available]	[Not Available]	[Not Available]	[Not Available]	0	[Not Available]	Preoperative	[Not Applicable]	[Not Available]	38	No	[Not Available]	[Not Available]	[Not Available]	[Not Available]	[Not Available]	[Not Available]	Cervical Squamous Cell Carcinoma	Non-keratinizing squamous cell carcinoma	G2	2009	Biopsy (cervical / CT-guided / Other)	[Not Applicable]
CF87812F-6DB6-4592-9842-C62B3E4FF03F	TCGA-HG-A9SC	6/19/14	NO	YES	Female	Pre (<6 months since LMP AND no prior bilateral ovariectomy AND not on estrogen replacement)	173	68	WHITE	NOT HISPANIC OR LATINO	Alive	Former User	0	[Not Available]	[Not Available]	[Not Available]	[Not Available]	No	[Not Available]	TUMOR FREE	[Not Available]	[Not Available]	[Not Available]	[Not Available]	1	[Not Available]	[Not Available]	[Not Available]	[Not Available]	[Not Available]	0	[Not Available]	Preoperative	[Not Applicable]	Complete Remission/Response	49	No	[Not Available]	[Not Available]	[Not Available]	[Not Available]	[Not Available]	[Not Available]	Adenosquamous	[Not Available]	G3	2013	Biopsy (cervical / CT-guided / Other)	[Not Applicable]
F150D999-CDEC-427E-B8B2-00731C648989	TCGA-HM-A3JJ	2003/12/13	YES	NO	Female	Pre (<6 months since LMP AND no prior bilateral ovariectomy AND not on estrogen replacement)	173	72	BLACK OR AFRICAN AMERICAN	NOT HISPANIC OR LATINO	Dead	Former User	6	5	[Not Available]	[Not Available]	[Not Available]	No	1	WITH TUMOR	[Not Available]	[Not Available]	[Not Available]	NO	[Not Available]	[Not Available]	[Not Available]	[Not Available]	[Not Available]	[Not Available]	0	[Not Available]	Preoperative	[Not Applicable]	[Not Available]	40	No	[Not Available]	[Not Available]	[Not Available]	[Not Available]	[Not Available]	[Not Available]	Cervical Squamous Cell Carcinoma	Non-keratinizing squamous cell carcinoma	G3	2010	Cone Biopsy / LEEP	[Not Applicable]
7C4CD55F-750E-4941-A9F3-0632A75D6531	TCGA-HM-A3JK	2/17/12	YES	NO	Female	Post (prior bilateral ovariectomy OR >12 mo since LMP with no prior hysterectomy)	165	94	WHITE	NOT HISPANIC OR LATINO	Alive	Never Used	0	0	[Not Available]	0	[Not Available]	No	0	TUMOR FREE	0	0	[Not Available]	NO	4	[Not Available]	2008	[Not Available]	[Not Available]	[Not Available]	0	[Not Available]	Preoperative	[Not Applicable]	[Not Available]	64	No	[Not Available]	[Not Available]	[Not Available]	[Not Available]	[Not Available]	[Not Available]	Cervical Squamous Cell Carcinoma	[Not Available]	G3	2011	Biopsy (cervical / CT-guided / Other)	[Not Applicable]
6BCF8B41-7ABC-4B6F-899A-1F67B4ADA765	TCGA-HM-A4S6	2/27/13	YES	NO	Female	Pre (<6 months since LMP AND no prior bilateral ovariectomy AND not on estrogen replacement)	152	101	WHITE	NOT HISPANIC OR LATINO	Alive	Former User	6	5	[Not Available]	1	[Not Available]	No	[Not Available]	TUMOR FREE	[Not Available]	[Not Available]	[Not Available]	NO	3	14	1995	[Not Available]	10	[Not Available]	0	[Not Available]	Preoperative	[Not Applicable]	[Not Applicable]	51	No	[Not Available]	[Not Available]	[Not Available]	[Not Available]	[Not Available]	[Not Available]	Cervical Squamous Cell Carcinoma	[Not Available]	G3	2012	Other method, specify:	Tissue in the cervix during pelvic exam was passed ans sent for pathology
929505F7-0270-475E-A9D6-00BF38DC78BA	TCGA-HM-A6W2	10/18/13	YES	NO	Female	Pre (<6 months since LMP AND no prior bilateral ovariectomy AND not on estrogen replacement)	160	89	BLACK OR AFRICAN AMERICAN	NOT HISPANIC OR LATINO	Alive	Former User	2	2	[Not Available]	[Not Available]	[Not Available]	No	[Not Available]	[Not Available]	[Not Available]	[Not Available]	[Not Available]	NO	2	27	[Not Available]	[Not Available]	8	[Not Available]	0	[Not Available]	Preoperative	[Not Applicable]	[Not Applicable]	34	No	[Not Available]	[Not Available]	[Not Available]	[Not Available]	[Not Available]	[Not Available]	Adenosquamous	[Not Available]	G3	2013	Biopsy (cervical / CT-guided / Other)	[Not Applicable]
66229DD6-C771-4455-A90C-C66FB40CF7FE	TCGA-IR-A3L7	4/13/12	NO	YES	Female	Pre (<6 months since LMP AND no prior bilateral ovariectomy AND not on estrogen replacement)	177	89	WHITE	[Not Available]	Alive	Former User	3	3	[Not Available]	0	[Not Available]	No	0	TUMOR FREE	0	0	[Not Available]	NO	4	17	1990	[Not Available]	10	[Not Available]	[Not Available]	[Not Available]	[Not Available]	[Not Applicable]	[Not Available]	37	No	[Not Available]	[Not Available]	[Not Available]	[Not Available]	[Not Available]	[Not Available]	Cervical Squamous Cell Carcinoma	[Not Available]	G3	2000	Cone Biopsy / LEEP	[Not Applicable]
7B8C04D7-824D-493D-8F2C-9ED87A907192	TCGA-IR-A3LA	1/24/13	NO	YES	Female	Post (prior bilateral ovariectomy OR >12 mo since LMP with no prior hysterectomy)	157	101	WHITE	[Not Available]	Alive	Never Used	2	0	[Not Available]	[Not Available]	[Not Available]	No	[Not Available]	TUMOR FREE	[Not Available]	[Not Available]	[Not Available]	NO	1	[Not Available]	[Not Available]	[Not Available]	[Not Available]	[Not Available]	[Not Available]	[Not Available]	[Not Available]	[Not Applicable]	Complete Remission/Response	60	No	[Not Available]	[Not Available]	[Not Available]	[Not Available]	[Not Available]	[Not Available]	Endometrioid Adenocarcinoma of Endocervix	[Not Available]	G3	2002	Other method, specify:	Dilation & curettage
E7C7783C-1D0F-4F42-A4CF-518825E91D91	TCGA-IR-A3LB	1/24/13	NO	YES	Female	Post (prior bilateral ovariectomy OR >12 mo since LMP with no prior hysterectomy)	168	94	WHITE	NOT HISPANIC OR LATINO	Dead	Never Used	4	2	[Not Available]	[Not Available]	[Not Available]	No	[Not Available]	WITH TUMOR	[Not Available]	[Not Available]	[Not Available]	NO	3	17	1972	[Not Available]	2.5	[Not Available]	[Not Available]	[Not Available]	[Not Available]	[Not Applicable]	Complete Remission/Response	53	No	[Not Available]	[Not Available]	[Not Available]	[Not Available]	[Not Available]	[Not Available]	Endocervical Type of Adenocarcinoma	[Not Available]	G3	2002	Biopsy (cervical / CT-guided / Other)	[Not Applicable]
58BDCACE-0047-456E-A225-68953EDAFE5E	TCGA-IR-A3LC	4/13/12	NO	YES	Female	Pre (<6 months since LMP AND no prior bilateral ovariectomy AND not on estrogen replacement)	160	64	WHITE	[Not Available]	Alive	Current User	3	3	[Not Available]	0	[Not Available]	No	0	TUMOR FREE	0	0	[Not Available]	NO	1	[Not Available]	[Not Available]	[Not Available]	[Not Available]	[Not Available]	[Not Available]	[Not Available]	[Not Available]	[Not Applicable]	[Not Available]	40	No	[Not Available]	[Not Available]	[Not Available]	[Not Available]	[Not Available]	[Not Available]	Cervical Squamous Cell Carcinoma	[Not Available]	G3	2003	Biopsy (cervical / CT-guided / Other)	[Not Applicable]
785DDEA1-399D-47D8-B2B0-39E95EAA24B5	TCGA-IR-A3LF	1/24/13	NO	YES	Female	Post (prior bilateral ovariectomy OR >12 mo since LMP with no prior hysterectomy)	155	86	WHITE	[Not Available]	Alive	Never Used	3	2	[Not Available]	1	[Not Available]	No	0	TUMOR FREE	0	0	[Not Available]	NO	1	[Not Available]	[Not Available]	[Not Available]	[Not Available]	[Not Available]	[Not Available]	[Not Available]	[Not Available]	[Not Applicable]	Complete Remission/Response	64	No	[Not Available]	[Not Available]	[Not Available]	[Not Available]	[Not Available]	[Not Available]	Endocervical Adenocarcinoma of the Usual Type	[Not Available]	G2	2004	Biopsy (cervical / CT-guided / Other)	[Not Applicable]
F24ED9C0-92BB-4003-86D2-42AB26617A05	TCGA-IR-A3LH	4/13/12	NO	YES	Female	Pre (<6 months since LMP AND no prior bilateral ovariectomy AND not on estrogen replacement)	154	74	BLACK OR AFRICAN AMERICAN	[Not Available]	Alive	Former User	2	1	[Not Available]	0	[Not Available]	No	0	TUMOR FREE	1	0	[Not Available]	NO	4	24	2000	[Not Available]	20	[Not Available]	[Not Available]	[Not Available]	[Not Available]	[Not Applicable]	[Not Available]	49	No	[Not Available]	[Not Available]	[Not Available]	[Not Available]	[Not Available]	[Not Available]	Cervical Squamous Cell Carcinoma	[Not Available]	G4	2005	Biopsy (cervical / CT-guided / Other)	[Not Applicable]
75BC22D8-738D-45F8-B6C0-C664F5FEF47C	TCGA-IR-A3LI	4/13/12	NO	YES	Female	Peri (6-12 months since last menstrual period)	169	71	WHITE	[Not Available]	Alive	Never Used	4	2	[Not Available]	0	[Not Available]	No	2	TUMOR FREE	0	0	[Not Available]	NO	1	[Not Available]	[Not Available]	[Not Available]	[Not Available]	[Not Available]	[Not Available]	[Not Available]	[Not Available]	[Not Applicable]	[Not Available]	48	No	[Not Available]	[Not Available]	[Not Available]	[Not Available]	[Not Available]	[Not Available]	Endocervical Type of Adenocarcinoma	[Not Available]	G2	2005	Other method, specify:	Surgical resection
B79558C5-1DB2-4B1E-A7B8-EFBD19AA855E	TCGA-IR-A3LK	4/13/12	NO	YES	Female	Post (prior bilateral ovariectomy OR >12 mo since LMP with no prior hysterectomy)	165	96	WHITE	[Not Available]	Dead	Never Used	1	1	[Not Available]	0	[Not Available]	No	0	WITH TUMOR	0	0	[Not Available]	NO	1	[Not Available]	[Not Available]	[Not Available]	[Not Available]	[Not Available]	[Not Available]	[Not Available]	[Not Available]	[Not Applicable]	[Not Available]	69	No	[Not Available]	[Not Available]	[Not Available]	[Not Available]	[Not Available]	[Not Available]	Cervical Squamous Cell Carcinoma	[Not Available]	G3	2009	Biopsy (cervical / CT-guided / Other)	[Not Applicable]
7C4AB1CA-4BDD-4EF7-9A42-F6C0C7136D26	TCGA-IR-A3LL	4/13/12	NO	YES	Female	Post (prior bilateral ovariectomy OR >12 mo since LMP with no prior hysterectomy)	157	92	WHITE	[Not Available]	Alive	[Not Available]	2	2	[Not Available]	0	[Not Available]	No	0	TUMOR FREE	0	0	[Not Available]	NO	1	[Not Available]	[Not Available]	[Not Available]	[Not Available]	[Not Available]	[Not Available]	[Not Available]	[Not Available]	[Not Applicable]	[Not Available]	60	No	[Not Available]	[Not Available]	[Not Available]	[Not Available]	[Not Available]	[Not Available]	Cervical Squamous Cell Carcinoma	[Not Available]	G2	2010	Biopsy (cervical / CT-guided / Other)	[Not Applicable]
0BD52D75-5113-4EF1-BC75-509F59EAEF2B	TCGA-JW-A5VG	2006/3/13	NO	YES	Female	Pre (<6 months since LMP AND no prior bilateral ovariectomy AND not on estrogen replacement)	158	110	AMERICAN INDIAN OR ALASKA NATIVE	HISPANIC OR LATINO	Alive	Never Used	5	5	[Not Available]	0	[Not Available]	No	0	TUMOR FREE	0	0	[Not Available]	NO	1	[Not Available]	[Not Available]	[Not Available]	[Not Available]	[Not Available]	0	[Not Available]	Post-Adjuvant Therapy	[Not Applicable]	Complete Remission/Response	35	No	[Not Available]	[Not Available]	[Not Available]	[Not Available]	[Not Available]	[Not Available]	Cervical Squamous Cell Carcinoma	Non-keratinizing squamous cell carcinoma	G3	2012	Biopsy (cervical / CT-guided / Other)	[Not Applicable]
6813C53C-B256-4115-AD90-24D75328779E	TCGA-JW-A5VH	5/31/13	NO	YES	Female	Pre (<6 months since LMP AND no prior bilateral ovariectomy AND not on estrogen replacement)	163	80	AMERICAN INDIAN OR ALASKA NATIVE	HISPANIC OR LATINO	Dead	[Not Available]	2	2	Cervical Cancer	0	[Not Available]	No	0	WITH TUMOR	0	0	[Not Available]	NO	1	[Not Available]	[Not Available]	[Not Available]	[Not Available]	[Not Available]	2	[Not Available]	Other	N/A	Progressive Disease	53	No	[Not Available]	[Not Available]	[Not Available]	[Not Available]	[Not Available]	[Not Available]	Cervical Squamous Cell Carcinoma	Non-keratinizing squamous cell carcinoma	G2	2012	Biopsy (cervical / CT-guided / Other)	[Not Applicable]
53EB4C4E-0719-476F-9B2B-279D438D7710	TCGA-JW-A5VI	2006/3/13	NO	YES	Female	Pre (<6 months since LMP AND no prior bilateral ovariectomy AND not on estrogen replacement)	158	59	AMERICAN INDIAN OR ALASKA NATIVE	HISPANIC OR LATINO	Alive	Former User	2	2	[Not Available]	0	[Not Available]	No	0	WITH TUMOR	0	0	[Not Available]	NO	2	26	[Not Available]	[Not Available]	10	[Not Available]	1	[Not Available]	Other	[Not Available]	Complete Remission/Response	45	No	[Not Available]	[Not Available]	[Not Available]	[Not Available]	[Not Available]	[Not Available]	Cervical Squamous Cell Carcinoma	Non-keratinizing squamous cell carcinoma	G3	2012	Biopsy (cervical / CT-guided / Other)	[Not Applicable]
F0BB0D18-1190-463D-A0BA-839C2C776794	TCGA-JW-A5VJ	2006/3/13	YES	NO	Female	Post (prior bilateral ovariectomy OR >12 mo since LMP with no prior hysterectomy)	155	57	AMERICAN INDIAN OR ALASKA NATIVE	HISPANIC OR LATINO	Alive	Never Used	3	2	[Not Available]	0	[Not Available]	No	0	WITH TUMOR	1	0	[Not Available]	NO	1	[Not Available]	[Not Available]	[Not Available]	[Not Available]	[Not Available]	2	[Not Available]	[Not Available]	[Not Applicable]	Progressive Disease	56	No	[Not Available]	[Not Available]	[Not Available]	[Not Available]	[Not Available]	[Not Available]	Cervical Squamous Cell Carcinoma	Non-keratinizing squamous cell carcinoma	G3	2012	Biopsy (cervical / CT-guided / Other)	[Not Applicable]
BBB96B5A-80E8-4542-80B4-2444CF1FE51E	TCGA-JW-A5VK	5/31/13	YES	NO	Female	Pre (<6 months since LMP AND no prior bilateral ovariectomy AND not on estrogen replacement)	158	68	BLACK OR AFRICAN AMERICAN	NOT HISPANIC OR LATINO	Alive	Never Used	1	1	[Not Available]	0	[Not Available]	No	0	TUMOR FREE	0	0	[Not Available]	NO	3	33	[Not Available]	[Not Available]	1	[Not Available]	1	[Not Available]	[Not Available]	[Not Applicable]	Complete Remission/Response	43	No	[Not Available]	[Not Available]	[Not Available]	[Not Available]	[Not Available]	[Not Available]	Cervical Squamous Cell Carcinoma	Non-keratinizing squamous cell carcinoma	G3	2012	Biopsy (cervical / CT-guided / Other)	[Not Applicable]
D1A5B028-EC79-456B-81A1-69838E2922DF	TCGA-JW-A5VL	5/31/13	YES	NO	Female	Pre (<6 months since LMP AND no prior bilateral ovariectomy AND not on estrogen replacement)	160	71	AMERICAN INDIAN OR ALASKA NATIVE	HISPANIC OR LATINO	Alive	[Not Available]	2	2	[Not Available]	0	[Not Available]	No	0	TUMOR FREE	0	0	[Not Available]	NO	1	[Not Available]	[Not Available]	[Not Available]	[Not Available]	[Not Available]	1	[Not Available]	Other	N/A	Complete Remission/Response	37	No	[Not Available]	[Not Available]	[Not Available]	[Not Available]	[Not Available]	[Not Available]	Cervical Squamous Cell Carcinoma	Non-keratinizing squamous cell carcinoma	G1	2012	Biopsy (cervical / CT-guided / Other)	[Not Applicable]
FB4AF6B2-4BED-4DBE-9309-29F59ED30FB2	TCGA-JW-A69B	2002/10/14	YES	NO	Female	Pre (<6 months since LMP AND no prior bilateral ovariectomy AND not on estrogen replacement)	155	69	WHITE	HISPANIC OR LATINO	Alive	Never Used	4	3	[Not Available]	1	[Not Available]	No	0	TUMOR FREE	0	0	[Not Available]	NO	1	[Not Available]	[Not Available]	[Not Available]	[Not Available]	[Not Available]	1	[Not Available]	Preoperative	[Not Applicable]	Complete Remission/Response	44	No	[Not Available]	[Not Available]	[Not Available]	[Not Available]	[Not Available]	[Not Available]	Endocervical Type of Adenocarcinoma	[Not Available]	GX	2012	Biopsy (cervical / CT-guided / Other)	[Not Applicable]
7CC8F5BD-D2D3-44E9-AFF6-FE9C9C805938	TCGA-JW-A852	2002/12/14	YES	NO	Female	Pre (<6 months since LMP AND no prior bilateral ovariectomy AND not on estrogen replacement)	160	100	WHITE	HISPANIC OR LATINO	Dead	[Not Available]	3	3	[Not Available]	0	[Not Available]	No	0	[Not Available]	0	0	[Not Available]	NO	1	[Not Available]	[Not Available]	[Not Available]	[Not Available]	[Not Available]	1	[Not Available]	Pre-Adjuvant Therapy	[Not Applicable]	Complete Remission/Response	42	No	[Not Available]	[Not Available]	[Not Available]	[Not Available]	[Not Available]	[Not Available]	Cervical Squamous Cell Carcinoma	Non-keratinizing squamous cell carcinoma	G2	2013	Biopsy (cervical / CT-guided / Other)	[Not Applicable]
1C0B5C18-8760-4483-A88C-1D1D89F61998	TCGA-JW-AAVH	2004/3/14	YES	NO	Female	Pre (<6 months since LMP AND no prior bilateral ovariectomy AND not on estrogen replacement)	155	165	WHITE	HISPANIC OR LATINO	Alive	[Not Available]	10	4	[Not Available]	6	[Not Available]	No	[Not Available]	TUMOR FREE	[Not Available]	[Not Available]	[Not Available]	NO	2	16	[Not Available]	[Not Available]	20	[Not Available]	2	[Not Available]	Pre-Adjuvant Therapy	[Not Applicable]	[Not Applicable]	46	No	[Not Available]	[Not Available]	[Not Available]	[Not Available]	[Not Available]	[Not Available]	Cervical Squamous Cell Carcinoma	Non-keratinizing squamous cell carcinoma	G2	2013	Biopsy (cervical / CT-guided / Other)	[Not Applicable]
3DF6ABE2-2123-4BFA-A4E4-88DF5F940C04	TCGA-JX-A3PZ	4/17/14	NO	YES	Female	Pre (<6 months since LMP AND no prior bilateral ovariectomy AND not on estrogen replacement)	175	58	WHITE	[Not Available]	Dead	Never Used	0	0	Cervical Cancer	0	[Not Available]	No	0	WITH TUMOR	0	0	[Not Available]	NO	1	[Not Available]	[Not Available]	[Not Available]	[Not Available]	[Not Available]	0	[Not Available]	Pre-Adjuvant Therapy	[Not Applicable]	Complete Remission/Response	25	No	[Not Available]	[Not Available]	[Not Available]	[Not Available]	[Not Available]	[Not Available]	Cervical Squamous Cell Carcinoma	Keratinizing squamous cell carcinoma	G2	1995	Biopsy (cervical / CT-guided / Other)	[Not Applicable]
20280122-A66A-4C83-8F25-0B9D97558DC2	TCGA-JX-A3Q0	4/17/14	NO	YES	Female	Post (prior bilateral ovariectomy OR >12 mo since LMP with no prior hysterectomy)	166	57	BLACK OR AFRICAN AMERICAN	NOT HISPANIC OR LATINO	Alive	Never Used	2	2	[Not Available]	0	[Not Available]	No	0	TUMOR FREE	0	0	[Not Available]	NO	4	24	1997	[Not Available]	20	[Not Available]	1	[Not Available]	Post-Adjuvant Therapy	[Not Applicable]	Complete Remission/Response	63	No	[Not Available]	[Not Available]	[Not Available]	[Not Available]	[Not Available]	[Not Available]	Cervical Squamous Cell Carcinoma	Keratinizing squamous cell carcinoma	G2	1997	Biopsy (cervical / CT-guided / Other)	[Not Applicable]
34629EB8-0C5E-4910-8E13-BF7D6A1E337F	TCGA-JX-A3Q8	4/17/14	NO	YES	Female	Pre (<6 months since LMP AND no prior bilateral ovariectomy AND not on estrogen replacement)	158	68	ASIAN	NOT HISPANIC OR LATINO	Alive	Former User	3	1	[Not Available]	1	[Not Available]	No	1	TUMOR FREE	0	0	[Not Available]	NO	1	[Not Available]	[Not Available]	[Not Available]	[Not Available]	[Not Available]	0	[Not Available]	Other	Post operative visit	Complete Remission/Response	40	No	[Not Available]	[Not Available]	[Not Available]	[Not Available]	[Not Available]	[Not Available]	Endocervical Type of Adenocarcinoma	[Not Available]	G3	2011	Biopsy (cervical / CT-guided / Other)	[Not Applicable]
ACF5CBF3-09CA-4F4D-A44E-1792613190FC	TCGA-JX-A5QV	2006/11/14	NO	YES	Female	Pre (<6 months since LMP AND no prior bilateral ovariectomy AND not on estrogen replacement)	165	61	WHITE	NOT HISPANIC OR LATINO	Alive	Never Used	5	4	[Not Available]	1	[Not Available]	No	0	TUMOR FREE	0	0	[Not Available]	NO	1	[Not Available]	[Not Available]	[Not Available]	[Not Available]	[Not Available]	0	[Not Available]	Preoperative	[Not Applicable]	Complete Remission/Response	37	No	[Not Available]	[Not Available]	[Not Available]	[Not Available]	[Not Available]	[Not Available]	Cervical Squamous Cell Carcinoma	Keratinizing squamous cell carcinoma	G3	2012	Biopsy (cervical / CT-guided / Other)	[Not Applicable]
E15D92A1-6925-4B58-A494-D6F665F67B83	TCGA-LP-A4AU	2003/12/13	YES	NO	Female	Pre (<6 months since LMP AND no prior bilateral ovariectomy AND not on estrogen replacement)	153	49	ASIAN	NOT HISPANIC OR LATINO	Alive	[Not Available]	1	1	[Not Available]	[Not Available]	[Not Available]	No	[Not Available]	TUMOR FREE	[Not Available]	[Not Available]	[Not Available]	NO	1	[Not Available]	[Not Available]	[Not Available]	[Not Available]	[Not Available]	[Not Available]	[Not Available]	[Not Available]	[Not Applicable]	[Not Available]	35	No	[Not Available]	[Not Available]	[Not Available]	[Not Available]	[Not Available]	[Not Available]	Cervical Squamous Cell Carcinoma	[Not Available]	G3	2011	Biopsy (cervical / CT-guided / Other)	[Not Applicable]
F241D6B1-2C32-4478-8F8D-8C746464F7D1	TCGA-LP-A4AV	2003/12/13	YES	NO	Female	[Not Available]	153	42	ASIAN	NOT HISPANIC OR LATINO	Alive	[Not Available]	4	4	[Not Available]	[Not Available]	[Not Available]	No	[Not Available]	TUMOR FREE	[Not Available]	[Not Available]	[Not Available]	NO	1	[Not Available]	[Not Available]	[Not Available]	[Not Available]	[Not Available]	[Not Available]	[Not Available]	[Not Available]	[Not Applicable]	[Not Available]	63	No	[Not Available]	[Not Available]	[Not Available]	[Not Available]	[Not Available]	[Not Available]	Cervical Squamous Cell Carcinoma	[Not Available]	G2	2011	Biopsy (cervical / CT-guided / Other)	[Not Applicable]
74E47DED-2C00-4455-AAA6-CD662DFBF05E	TCGA-LP-A4AW	2003/12/13	YES	NO	Female	Peri (6-12 months since last menstrual period)	158	52	ASIAN	NOT HISPANIC OR LATINO	Alive	[Not Available]	2	2	[Not Available]	[Not Available]	[Not Available]	No	[Not Available]	TUMOR FREE	[Not Available]	[Not Available]	[Not Available]	NO	1	[Not Available]	[Not Available]	[Not Available]	[Not Available]	[Not Available]	[Not Available]	[Not Available]	[Not Available]	[Not Applicable]	[Not Available]	52	No	[Not Available]	[Not Available]	[Not Available]	[Not Available]	[Not Available]	[Not Available]	Cervical Squamous Cell Carcinoma	Keratinizing squamous cell carcinoma	G1	2011	Biopsy (cervical / CT-guided / Other)	[Not Applicable]
3223FEC6-1D35-419A-8EE9-7C5885B8BE1E	TCGA-LP-A4AX	2003/12/13	YES	NO	Female	Peri (6-12 months since last menstrual period)	[Not Available]	[Not Available]	ASIAN	NOT HISPANIC OR LATINO	Alive	[Not Available]	2	2	[Not Available]	[Not Available]	[Not Available]	No	[Not Available]	TUMOR FREE	[Not Available]	[Not Available]	[Not Available]	NO	1	[Not Available]	[Not Available]	[Not Available]	[Not Available]	[Not Available]	[Not Available]	[Not Available]	[Not Available]	[Not Applicable]	[Not Available]	45	No	[Not Available]	[Not Available]	[Not Available]	[Not Available]	[Not Available]	[Not Available]	Cervical Squamous Cell Carcinoma	[Not Available]	G3	2011	Biopsy (cervical / CT-guided / Other)	[Not Applicable]
1EF20703-3684-4B43-A31F-892073208377	TCGA-LP-A5U2	2007/3/14	YES	NO	Female	Pre (<6 months since LMP AND no prior bilateral ovariectomy AND not on estrogen replacement)	160	51	ASIAN	NOT HISPANIC OR LATINO	Alive	Never Used	1	[Not Available]	[Not Available]	[Not Available]	[Not Available]	No	1	TUMOR FREE	[Not Available]	[Not Available]	[Not Available]	YES	1	[Not Available]	[Not Available]	[Not Available]	[Not Available]	[Not Available]	1	[Not Available]	Preoperative	[Not Applicable]	Complete Remission/Response	30	No	[Not Available]	[Not Available]	[Not Available]	[Not Available]	[Not Available]	[Not Available]	Endocervical Adenocarcinoma of the Usual Type	[Not Available]	G3	2012	Biopsy (cervical / CT-guided / Other)	[Not Applicable]
1399D31D-9D5E-441A-B400-8B8A92A6FF8B	TCGA-LP-A5U3	2001/3/14	YES	NO	Female	Pre (<6 months since LMP AND no prior bilateral ovariectomy AND not on estrogen replacement)	160	50	ASIAN	NOT HISPANIC OR LATINO	Alive	Never Used	3	3	[Not Available]	[Not Available]	[Not Available]	No	[Not Available]	TUMOR FREE	[Not Available]	[Not Available]	[Not Available]	NO	1	[Not Available]	[Not Available]	[Not Available]	[Not Available]	[Not Available]	1	[Not Available]	Preoperative	[Not Applicable]	Complete Remission/Response	40	No	[Not Available]	[Not Available]	[Not Available]	[Not Available]	[Not Available]	[Not Available]	Cervical Squamous Cell Carcinoma	Non-keratinizing squamous cell carcinoma	G3	2012	Biopsy (cervical / CT-guided / Other)	[Not Applicable]
7067B7DA-FB1B-4827-8FE6-9433ED672D3B	TCGA-LP-A7HU	2001/3/14	YES	NO	Female	Post (prior bilateral ovariectomy OR >12 mo since LMP with no prior hysterectomy)	155	58	ASIAN	NOT HISPANIC OR LATINO	Alive	Never Used	3	2	[Not Available]	[Not Available]	[Not Available]	No	[Not Available]	TUMOR FREE	[Not Available]	[Not Available]	[Not Available]	NO	1	[Not Available]	[Not Available]	[Not Available]	[Not Available]	[Not Available]	1	[Not Available]	Preoperative	[Not Applicable]	[Not Available]	53	No	[Not Available]	[Not Available]	[Not Available]	[Not Available]	[Not Available]	[Not Available]	Endocervical Type of Adenocarcinoma	[Not Available]	G3	2013	Biopsy (cervical / CT-guided / Other)	[Not Applicable]
FC2BCE29-4685-49F5-B901-2117BF673BB8	TCGA-MA-AA3W	7/15/14	YES	NO	Female	Post (prior bilateral ovariectomy OR >12 mo since LMP with no prior hysterectomy)	155	84	WHITE	HISPANIC OR LATINO	Alive	[Not Available]	6	4	[Not Available]	1	[Not Available]	No	[Not Available]	TUMOR FREE	1	[Not Available]	[Not Available]	NO	2	18	[Not Available]	[Not Available]	5.7	[Not Available]	1	[Not Available]	Preoperative	[Not Applicable]	Complete Remission/Response	54	No	[Not Available]	[Not Available]	[Not Available]	[Not Available]	[Not Available]	[Not Available]	Cervical Squamous Cell Carcinoma	Non-keratinizing squamous cell carcinoma	G3	2012	Biopsy (cervical / CT-guided / Other)	[Not Applicable]
ADB7C5C8-4AFD-40DC-89F1-571FBD88E4F9	TCGA-MA-AA3X	7/15/14	YES	NO	Female	Post (prior bilateral ovariectomy OR >12 mo since LMP with no prior hysterectomy)	170	73	BLACK OR AFRICAN AMERICAN	NOT HISPANIC OR LATINO	Alive	[Not Available]	3	2	[Not Available]	1	[Not Available]	No	[Not Available]	TUMOR FREE	[Not Available]	[Not Available]	[Not Available]	NO	2	12	[Not Available]	[Not Available]	9.5	[Not Available]	1	[Not Available]	Pre-Adjuvant Therapy	[Not Applicable]	Complete Remission/Response	50	No	[Not Available]	[Not Available]	[Not Available]	[Not Available]	[Not Available]	[Not Available]	Cervical Squamous Cell Carcinoma	Non-keratinizing squamous cell carcinoma	G2	2012	Biopsy (cervical / CT-guided / Other)	[Not Applicable]
2F261704-D600-4226-90D5-D51BA416B55C	TCGA-MA-AA3Y	7/16/14	YES	NO	Female	Pre (<6 months since LMP AND no prior bilateral ovariectomy AND not on estrogen replacement)	156	65	WHITE	HISPANIC OR LATINO	Alive	Never Used	1	[Not Available]	[Not Available]	1	[Not Available]	No	[Not Available]	TUMOR FREE	[Not Available]	[Not Available]	[Not Available]	NO	1	[Not Available]	[Not Available]	[Not Available]	[Not Available]	[Not Available]	1	[Not Available]	Preoperative	[Not Applicable]	Complete Remission/Response	48	No	[Not Available]	[Not Available]	[Not Available]	[Not Available]	[Not Available]	[Not Available]	Cervical Squamous Cell Carcinoma	Keratinizing squamous cell carcinoma	G3	2012	Biopsy (cervical / CT-guided / Other)	[Not Applicable]
BC2003B9-D489-4559-8672-D9FD2D82F2E8	TCGA-MA-AA3Z	7/16/14	YES	NO	Female	Pre (<6 months since LMP AND no prior bilateral ovariectomy AND not on estrogen replacement)	160	84	WHITE	HISPANIC OR LATINO	Alive	Former User	5	5	[Not Available]	[Not Available]	[Not Available]	No	[Not Available]	TUMOR FREE	[Not Available]	[Not Available]	[Not Available]	NO	1	[Not Available]	[Not Available]	[Not Available]	[Not Available]	[Not Available]	1	[Not Available]	Pre-Adjuvant Therapy	[Not Applicable]	Complete Remission/Response	43	No	[Not Available]	[Not Available]	[Not Available]	[Not Available]	[Not Available]	[Not Available]	Cervical Squamous Cell Carcinoma	Non-keratinizing squamous cell carcinoma	GX	2013	Biopsy (cervical / CT-guided / Other)	[Not Applicable]
81658CE6-D4A9-4EE0-AE8F-CF2FA8485701	TCGA-MA-AA41	7/16/14	YES	NO	Female	Pre (<6 months since LMP AND no prior bilateral ovariectomy AND not on estrogen replacement)	159	47	WHITE	HISPANIC OR LATINO	Alive	Former User	3	3	[Not Available]	[Not Available]	[Not Available]	No	[Not Available]	WITH TUMOR	[Not Available]	[Not Available]	[Not Available]	NO	2	14	[Not Available]	[Not Available]	5	[Not Available]	1	[Not Available]	Pre-Adjuvant Therapy	[Not Applicable]	Progressive Disease	33	No	[Not Available]	[Not Available]	[Not Available]	[Not Available]	[Not Available]	[Not Available]	Cervical Squamous Cell Carcinoma	Non-keratinizing squamous cell carcinoma	G2	2013	Biopsy (cervical / CT-guided / Other)	[Not Applicable]
DA5FCB99-16B4-4F9E-8602-D6A6192875EF	TCGA-MA-AA42	7/22/14	YES	NO	Female	Post (prior bilateral ovariectomy OR >12 mo since LMP with no prior hysterectomy)	140	63	WHITE	HISPANIC OR LATINO	Alive	[Not Available]	8	6	[Not Available]	2	[Not Available]	No	[Not Available]	TUMOR FREE	[Not Available]	[Not Available]	[Not Available]	NO	1	[Not Available]	[Not Available]	[Not Available]	[Not Available]	[Not Available]	1	[Not Available]	Pre-Adjuvant Therapy	[Not Applicable]	Complete Remission/Response	75	No	[Not Available]	[Not Available]	[Not Available]	[Not Available]	[Not Available]	[Not Available]	Cervical Squamous Cell Carcinoma	Non-keratinizing squamous cell carcinoma	G3	2013	Biopsy (cervical / CT-guided / Other)	[Not Applicable]
ED74703A-6838-4F4E-9524-D6FB7B208687	TCGA-MA-AA43	7/22/14	YES	NO	Female	Peri (6-12 months since last menstrual period)	152	72	WHITE	HISPANIC OR LATINO	Alive	Never Used	6	6	[Not Available]	[Not Available]	[Not Available]	No	[Not Available]	TUMOR FREE	[Not Available]	[Not Available]	[Not Available]	NO	4	16	2013	[Not Available]	11.6	[Not Available]	1	[Not Available]	Pre-Adjuvant Therapy	[Not Applicable]	Complete Remission/Response	48	No	[Not Available]	[Not Available]	[Not Available]	[Not Available]	[Not Available]	[Not Available]	Cervical Squamous Cell Carcinoma	Non-keratinizing squamous cell carcinoma	G3	2013	Biopsy (cervical / CT-guided / Other)	[Not Applicable]
77DA506B-E726-409F-B3EB-D41242862982	TCGA-MU-A51Y	9/14/12	YES	NO	Female	Pre (<6 months since LMP AND no prior bilateral ovariectomy AND not on estrogen replacement)	[Not Available]	31	WHITE	[Not Available]	Alive	[Not Available]	[Not Available]	1	[Not Available]	[Not Available]	[Not Available]	No	3	TUMOR FREE	[Not Available]	[Not Available]	[Not Available]	[Not Available]	1	[Not Available]	[Not Available]	[Not Available]	[Not Available]	[Not Available]	[Not Available]	[Not Available]	[Not Available]	[Not Applicable]	Complete Remission/Response	27	No	[Not Available]	[Not Available]	[Not Available]	[Not Available]	[Not Available]	[Not Available]	Cervical Squamous Cell Carcinoma	Non-keratinizing squamous cell carcinoma	G2	2012	Cone Biopsy / LEEP	[Not Applicable]
5E972E96-7271-439A-905C-6E308C1EF29E	TCGA-MU-A5YI	5/23/13	YES	NO	Female	Post (prior bilateral ovariectomy OR >12 mo since LMP with no prior hysterectomy)	175	101	BLACK OR AFRICAN AMERICAN	NOT HISPANIC OR LATINO	Alive	[Not Available]	[Not Available]	[Not Available]	[Not Available]	[Not Available]	[Not Available]	No	[Not Available]	TUMOR FREE	[Not Available]	[Not Available]	[Not Available]	[Not Available]	3	37	1991	[Not Available]	10	[Not Available]	[Not Available]	[Not Available]	[Not Available]	[Not Applicable]	[Not Available]	60	No	[Not Available]	[Not Available]	[Not Available]	[Not Available]	[Not Available]	[Not Available]	Cervical Squamous Cell Carcinoma	Non-keratinizing squamous cell carcinoma	G2	2011	Other method, specify:	Hysterectomy
1D730565-FFA9-4CC7-A713-C4B5B7BBB29F	TCGA-MU-A8JM	2010/9/13	YES	NO	Female	[Not Available]	165	86	WHITE	NOT HISPANIC OR LATINO	Alive	[Not Available]	2	1	[Not Available]	1	[Not Available]	No	[Not Available]	TUMOR FREE	[Not Available]	[Not Available]	[Not Available]	NO	4	16	2012	[Not Available]	30	[Not Available]	[Not Available]	[Not Available]	[Not Available]	[Not Applicable]	Complete Remission/Response	46	No	[Not Available]	[Not Available]	[Not Available]	[Not Available]	[Not Available]	[Not Available]	Cervical Squamous Cell Carcinoma	Non-keratinizing squamous cell carcinoma	G2	2013	Cone Biopsy / LEEP	[Not Applicable]
CEF2EFB2-93CC-4BDF-A343-9965E7E0432C	TCGA-MY-A5BD	5/20/13	NO	YES	Female	Post (prior bilateral ovariectomy OR >12 mo since LMP with no prior hysterectomy)	157	91	WHITE	HISPANIC OR LATINO	Alive	[Not Available]	[Not Available]	[Not Available]	[Not Available]	[Not Available]	[Not Available]	No	[Not Available]	TUMOR FREE	[Not Available]	[Not Available]	[Not Available]	[Not Available]	1	[Not Available]	[Not Available]	[Not Available]	[Not Available]	[Not Available]	[Not Available]	[Not Available]	[Not Available]	[Not Applicable]	[Not Available]	62	No	[Not Available]	[Not Available]	[Not Available]	[Not Available]	[Not Available]	[Not Available]	Cervical Squamous Cell Carcinoma	[Not Available]	G1	2010	Biopsy (cervical / CT-guided / Other)	[Not Applicable]
F8AB17EC-C365-41A6-A4BC-36653E84BCE5	TCGA-MY-A5BE	5/20/13	NO	YES	Female	Post (prior bilateral ovariectomy OR >12 mo since LMP with no prior hysterectomy)	157	84	BLACK OR AFRICAN AMERICAN	NOT HISPANIC OR LATINO	Alive	[Not Available]	[Not Available]	[Not Available]	[Not Available]	[Not Available]	[Not Available]	No	[Not Available]	TUMOR FREE	[Not Available]	[Not Available]	[Not Available]	[Not Available]	1	[Not Available]	[Not Available]	[Not Available]	[Not Available]	[Not Available]	[Not Available]	[Not Available]	[Not Available]	[Not Applicable]	[Not Available]	42	No	[Not Available]	[Not Available]	[Not Available]	[Not Available]	[Not Available]	[Not Available]	Cervical Squamous Cell Carcinoma	[Not Available]	G3	2011	Biopsy (cervical / CT-guided / Other)	[Not Applicable]
4F4E8834-A716-42E6-BD51-60D80A619202	TCGA-MY-A5BF	5/20/13	YES	NO	Female	Post (prior bilateral ovariectomy OR >12 mo since LMP with no prior hysterectomy)	170	74	WHITE	NOT HISPANIC OR LATINO	Alive	[Not Available]	[Not Available]	[Not Available]	[Not Available]	[Not Available]	[Not Available]	No	[Not Available]	TUMOR FREE	[Not Available]	[Not Available]	[Not Available]	[Not Available]	1	[Not Available]	[Not Available]	[Not Available]	[Not Available]	[Not Available]	[Not Available]	[Not Available]	[Not Available]	[Not Applicable]	[Not Available]	68	No	[Not Available]	[Not Available]	[Not Available]	[Not Available]	[Not Available]	[Not Available]	Cervical Squamous Cell Carcinoma	[Not Available]	G1	2012	Lymph node sampling or dissection	[Not Applicable]
C9F519B6-73F1-4737-83CB-F5EF208592CD	TCGA-MY-A913	4/23/14	YES	NO	Female	Pre (<6 months since LMP AND no prior bilateral ovariectomy AND not on estrogen replacement)	163	76	BLACK OR AFRICAN AMERICAN	HISPANIC OR LATINO	Alive	[Not Available]	7	5	[Not Available]	1	[Not Available]	No	1	TUMOR FREE	[Not Available]	[Not Available]	[Not Available]	NO	5	[Not Available]	[Not Available]	[Not Available]	[Not Available]	[Not Available]	0	[Not Available]	Post-Adjuvant Therapy	[Not Applicable]	Complete Remission/Response	28	No	[Not Available]	[Not Available]	[Not Available]	[Not Available]	[Not Available]	[Not Available]	Cervical Squamous Cell Carcinoma	[Not Available]	G3	2013	Biopsy (cervical / CT-guided / Other)	[Not Applicable]
55ADD854-E63F-4335-BEA9-23C3EB1E766A	TCGA-PN-A8MA	3/25/14	YES	NO	Female	Pre (<6 months since LMP AND no prior bilateral ovariectomy AND not on estrogen replacement)	167	71	BLACK OR AFRICAN AMERICAN	NOT HISPANIC OR LATINO	Alive	Former User	9	8	[Not Available]	1	[Not Available]	No	[Not Available]	WITH TUMOR	[Not Available]	[Not Available]	[Not Available]	NO	[Not Available]	[Not Available]	[Not Available]	[Not Available]	[Not Available]	[Not Available]	1	[Not Available]	Other	during adjuvant therapy	Stable Disease	43	No	[Not Available]	[Not Available]	[Not Available]	[Not Available]	[Not Available]	[Not Available]	Cervical Squamous Cell Carcinoma	Non-keratinizing squamous cell carcinoma	G3	2013	Biopsy (cervical / CT-guided / Other)	[Not Applicable]
F93CCD2D-3C77-4BD3-8CAC-5203BD57735F	TCGA-Q1-A5R1	4/26/13	YES	NO	Female	Pre (<6 months since LMP AND no prior bilateral ovariectomy AND not on estrogen replacement)	183	92	WHITE	NOT HISPANIC OR LATINO	Alive	Current User	2	1	[Not Available]	[Not Available]	[Not Available]	No	[Not Available]	TUMOR FREE	[Not Available]	[Not Available]	[Not Available]	NO	1	[Not Available]	[Not Available]	[Not Available]	[Not Available]	[Not Available]	0	[Not Available]	Other	Post-op	Complete Remission/Response	32	No	[Not Available]	[Not Available]	[Not Available]	[Not Available]	[Not Available]	[Not Available]	Mucinous Adenocarcinoma of Endocervical Type	Non-keratinizing squamous cell carcinoma	G2	2012	Cytology (e.g. Peritoneal or pleural fluid)	[Not Applicable]
F3CBADB3-3B83-47CD-B8A0-B0E10343A295	TCGA-Q1-A5R2	4/26/13	YES	NO	Female	Post (prior bilateral ovariectomy OR >12 mo since LMP with no prior hysterectomy)	160	76	WHITE	NOT HISPANIC OR LATINO	Alive	Former User	2	2	[Not Available]	[Not Available]	[Not Available]	No	[Not Available]	WITH TUMOR	[Not Available]	[Not Available]	[Not Available]	NO	1	[Not Available]	[Not Available]	[Not Available]	[Not Available]	[Not Available]	0	[Not Available]	Post-Adjuvant Therapy	[Not Applicable]	[Not Applicable]	64	No	[Not Available]	[Not Available]	[Not Available]	[Not Available]	[Not Available]	[Not Available]	Cervical Squamous Cell Carcinoma	Non-keratinizing squamous cell carcinoma	G3	2012	Biopsy (cervical / CT-guided / Other)	[Not Applicable]
73AA428A-4288-45F8-8A53-CEC173DCC61F	TCGA-Q1-A5R3	4/26/13	YES	NO	Female	Post (prior bilateral ovariectomy OR >12 mo since LMP with no prior hysterectomy)	162	50	WHITE	NOT HISPANIC OR LATINO	Alive	Former User	5	3	[Not Available]	[Not Available]	[Not Available]	No	[Not Available]	TUMOR FREE	[Not Available]	[Not Available]	[Not Available]	NO	1	[Not Available]	[Not Available]	[Not Available]	[Not Available]	[Not Available]	0	[Not Available]	Post-Adjuvant Therapy	[Not Applicable]	Complete Remission/Response	56	No	[Not Available]	[Not Available]	[Not Available]	[Not Available]	[Not Available]	[Not Available]	Cervical Squamous Cell Carcinoma	Non-keratinizing squamous cell carcinoma	G2	2012	Biopsy (cervical / CT-guided / Other)	[Not Applicable]
46ADFBBE-3ADD-41CD-A388-B1EE0790BF62	TCGA-Q1-A6DT	8/20/13	YES	NO	Female	Post (prior bilateral ovariectomy OR >12 mo since LMP with no prior hysterectomy)	[Not Available]	[Not Available]	WHITE	NOT HISPANIC OR LATINO	Dead	[Not Available]	[Not Available]	[Not Available]	[Not Available]	[Not Available]	[Not Available]	No	[Not Available]	WITH TUMOR	[Not Available]	[Not Available]	[Not Available]	NO	1	[Not Available]	[Not Available]	[Not Available]	[Not Available]	[Not Available]	[Not Available]	[Not Available]	[Not Available]	[Not Applicable]	[Not Available]	55	No	[Not Available]	[Not Available]	[Not Available]	[Not Available]	[Not Available]	[Not Available]	Cervical Squamous Cell Carcinoma	Non-keratinizing squamous cell carcinoma	GX	2013	Biopsy (cervical / CT-guided / Other)	[Not Applicable]
C80F777E-D150-40F3-9FA9-02EF9A6D7692	TCGA-Q1-A6DV	8/20/13	YES	NO	Female	Pre (<6 months since LMP AND no prior bilateral ovariectomy AND not on estrogen replacement)	152	60	ASIAN	NOT HISPANIC OR LATINO	Alive	Current User	0	[Not Available]	[Not Available]	[Not Available]	[Not Available]	No	[Not Available]	[Not Available]	[Not Available]	[Not Available]	[Not Available]	NO	1	[Not Available]	[Not Available]	[Not Available]	[Not Available]	[Not Available]	0	[Not Available]	Preoperative	[Not Applicable]	[Not Available]	36	No	[Not Available]	[Not Available]	[Not Available]	[Not Available]	[Not Available]	[Not Available]	Mucinous Adenocarcinoma of Endocervical Type	Non-keratinizing squamous cell carcinoma	G2	2013	Other method, specify:	Hysterectomy
5DBD5436-696E-40FA-881B-C2386573AC68	TCGA-Q1-A6DW	8/20/13	YES	NO	Female	Pre (<6 months since LMP AND no prior bilateral ovariectomy AND not on estrogen replacement)	160	62	WHITE	NOT HISPANIC OR LATINO	Alive	[Not Available]	1	1	[Not Available]	[Not Available]	[Not Available]	No	[Not Available]	[Not Available]	[Not Available]	[Not Available]	[Not Available]	NO	4	35	2009	[Not Available]	2.5	[Not Available]	0	[Not Available]	Post-Adjuvant Therapy	[Not Applicable]	[Not Available]	44	No	[Not Available]	[Not Available]	[Not Available]	[Not Available]	[Not Available]	[Not Available]	Cervical Squamous Cell Carcinoma	Non-keratinizing squamous cell carcinoma	GX	2013	Biopsy (cervical / CT-guided / Other)	[Not Applicable]
D0CBE668-5C95-4261-A1E8-CEF55093A0F7	TCGA-Q1-A73O	10/31/13	YES	NO	Female	Pre (<6 months since LMP AND no prior bilateral ovariectomy AND not on estrogen replacement)	152	76	[Not Available]	HISPANIC OR LATINO	Alive	[Not Available]	[Not Available]	[Not Available]	[Not Available]	[Not Available]	[Not Available]	No	[Not Available]	[Not Available]	[Not Available]	[Not Available]	[Not Available]	NO	1	[Not Available]	[Not Available]	[Not Available]	[Not Available]	[Not Available]	0	[Not Available]	Post-Adjuvant Therapy	[Not Applicable]	[Not Available]	37	No	[Not Available]	[Not Available]	[Not Available]	[Not Available]	[Not Available]	[Not Available]	Cervical Squamous Cell Carcinoma	Non-keratinizing squamous cell carcinoma	GX	2013	Biopsy (cervical / CT-guided / Other)	[Not Applicable]
3A3A9B5E-12A1-41F5-A54C-D4C1E0ECCB9E	TCGA-Q1-A73P	10/31/13	YES	NO	Female	Pre (<6 months since LMP AND no prior bilateral ovariectomy AND not on estrogen replacement)	173	82	WHITE	NOT HISPANIC OR LATINO	Alive	Former User	6	5	[Not Available]	[Not Available]	[Not Available]	No	[Not Available]	[Not Available]	[Not Available]	[Not Available]	[Not Available]	NO	1	[Not Available]	[Not Available]	[Not Available]	[Not Available]	[Not Available]	0	[Not Available]	Post-Adjuvant Therapy	[Not Applicable]	[Not Available]	45	No	[Not Available]	[Not Available]	[Not Available]	[Not Available]	[Not Available]	[Not Available]	Endocervical Type of Adenocarcinoma	[Not Available]	G1	2013	Biopsy (cervical / CT-guided / Other)	[Not Applicable]
5C72BDA2-2EC0-455F-AB27-7247FD5FFFF9	TCGA-Q1-A73Q	10/31/13	YES	NO	Female	Pre (<6 months since LMP AND no prior bilateral ovariectomy AND not on estrogen replacement)	158	87	WHITE	NOT HISPANIC OR LATINO	Alive	[Not Available]	2	1	[Not Available]	[Not Available]	[Not Available]	No	[Not Available]	[Not Available]	1	[Not Available]	[Not Available]	NO	2	13	[Not Available]	[Not Available]	3.3	[Not Available]	0	[Not Available]	Post-Adjuvant Therapy	[Not Applicable]	[Not Available]	46	No	[Not Available]	[Not Available]	[Not Available]	[Not Available]	[Not Available]	[Not Available]	Cervical Squamous Cell Carcinoma	Keratinizing squamous cell carcinoma	GX	2013	Biopsy (cervical / CT-guided / Other)	[Not Applicable]
D9B0AC5A-811D-4305-BB1C-A965BD389CE4	TCGA-Q1-A73R	10/31/13	YES	NO	Female	Pre (<6 months since LMP AND no prior bilateral ovariectomy AND not on estrogen replacement)	155	95	WHITE	[Not Available]	Alive	[Not Available]	[Not Available]	[Not Available]	[Not Available]	[Not Available]	[Not Available]	No	[Not Available]	[Not Available]	[Not Available]	[Not Available]	[Not Available]	NO	1	[Not Available]	[Not Available]	[Not Available]	[Not Available]	[Not Available]	0	[Not Available]	Post-Adjuvant Therapy	[Not Applicable]	[Not Available]	45	No	[Not Available]	[Not Available]	[Not Available]	[Not Available]	[Not Available]	[Not Available]	Endocervical Type of Adenocarcinoma	[Not Available]	GX	2013	Biopsy (cervical / CT-guided / Other)	[Not Applicable]
B0F63819-FC86-4981-9D92-0115C6DE3BCE	TCGA-Q1-A73S	10/31/13	YES	NO	Female	Pre (<6 months since LMP AND no prior bilateral ovariectomy AND not on estrogen replacement)	160	68	WHITE	NOT HISPANIC OR LATINO	Alive	Former User	4	2	[Not Available]	[Not Available]	[Not Available]	No	[Not Available]	[Not Available]	[Not Available]	[Not Available]	[Not Available]	NO	4	19	2012	[Not Available]	7.5	[Not Available]	0	[Not Available]	Post-Adjuvant Therapy	[Not Applicable]	[Not Available]	33	No	[Not Available]	[Not Available]	[Not Available]	[Not Available]	[Not Available]	[Not Available]	Adenosquamous	Non-keratinizing squamous cell carcinoma	G2	2012	Other method, specify:	Hysterectomy
0E137272-A21C-4C5E-BFD1-A774B339A753	TCGA-R2-A69V	7/15/13	YES	NO	Female	Peri (6-12 months since last menstrual period)	157	116	WHITE	NOT HISPANIC OR LATINO	Alive	[Not Available]	[Not Available]	1	[Not Available]	[Not Available]	[Not Available]	No	[Not Available]	TUMOR FREE	[Not Available]	[Not Available]	[Not Available]	NO	1	[Not Available]	[Not Available]	[Not Available]	[Not Available]	[Not Available]	[Not Available]	[Not Available]	[Not Available]	[Not Applicable]	Complete Remission/Response	42	No	[Not Available]	[Not Available]	[Not Available]	[Not Available]	[Not Available]	[Not Available]	Cervical Squamous Cell Carcinoma	Non-keratinizing squamous cell carcinoma	G3	2011	Cytology (e.g. Peritoneal or pleural fluid)	[Not Applicable]
BDAD2F13-EDE2-4AAD-91A4-BF60F8888BF2	TCGA-RA-A741	11/13/13	YES	NO	Female	Pre (<6 months since LMP AND no prior bilateral ovariectomy AND not on estrogen replacement)	165	86	WHITE	NOT HISPANIC OR LATINO	Alive	[Not Available]	0	0	[Not Available]	0	[Not Available]	No	0	[Not Available]	0	0	[Not Available]	NO	4	21	2013	[Not Available]	10	[Not Available]	0	[Not Available]	Preoperative	[Not Applicable]	[Not Available]	34	No	[Not Available]	[Not Available]	[Not Available]	[Not Available]	[Not Available]	[Not Available]	Cervical Squamous Cell Carcinoma	Non-keratinizing squamous cell carcinoma	GX	2013	Biopsy (cervical / CT-guided / Other)	[Not Applicable]
0F18EF74-019B-478D-AECD-60CC715BFDB7	TCGA-UC-A7PD	2002/4/14	NO	YES	Female	Pre (<6 months since LMP AND no prior bilateral ovariectomy AND not on estrogen replacement)	[Not Available]	[Not Available]	AMERICAN INDIAN OR ALASKA NATIVE	[Not Available]	Dead	Former User	5	4	Cervical Cancer	0	[Not Available]	No	1	WITH TUMOR	0	0	[Not Available]	YES	2	13	[Not Available]	[Not Available]	1.75	[Not Available]	1	[Not Available]	Preoperative	[Not Applicable]	Complete Remission/Response	21	No	[Not Available]	[Not Available]	[Not Available]	[Not Available]	[Not Available]	[Not Available]	Cervical Squamous Cell Carcinoma	Keratinizing squamous cell carcinoma	G2	1997	Other method, specify:	tumor resection
1451821E-DD49-41FA-A52E-32F8524FFE82	TCGA-UC-A7PF	2002/4/14	NO	YES	Female	Pre (<6 months since LMP AND no prior bilateral ovariectomy AND not on estrogen replacement)	[Not Available]	210	[Not Available]	[Not Available]	Dead	[Not Available]	4	2	[Not Available]	0	[Not Available]	No	0	[Not Available]	2	0	[Not Available]	NO	2	[Not Available]	[Not Available]	[Not Available]	[Not Available]	[Not Available]	[Not Available]	[Not Available]	[Not Available]	[Not Applicable]	[Not Available]	44	No	[Not Available]	[Not Available]	[Not Available]	[Not Available]	[Not Available]	[Not Available]	Cervical Squamous Cell Carcinoma	[Not Available]	G2	1999	Cone Biopsy / LEEP	[Not Applicable]
53D99A89-6EBD-4637-91DB-7CE43EBC6B8B	TCGA-UC-A7PG	7/17/14	NO	YES	Female	Pre (<6 months since LMP AND no prior bilateral ovariectomy AND not on estrogen replacement)	[Not Available]	82	WHITE	[Not Available]	Dead	[Not Available]	5	3	Cervical Cancer	0	[Not Available]	No	2	WITH TUMOR	0	0	[Not Available]	NO	2	18	[Not Available]	[Not Available]	52	[Not Available]	1	[Not Available]	Preoperative	[Not Applicable]	Progressive Disease	44	No	[Not Available]	[Not Available]	[Not Available]	[Not Available]	[Not Available]	[Not Available]	Cervical Squamous Cell Carcinoma	Non-keratinizing squamous cell carcinoma	G1	2003	Biopsy (cervical / CT-guided / Other)	[Not Applicable]
C659F1C9-F3B4-4CFE-8627-2BB716C62B96	TCGA-UC-A7PI	7/17/14	NO	YES	Female	Pre (<6 months since LMP AND no prior bilateral ovariectomy AND not on estrogen replacement)	[Not Available]	64	WHITE	NOT HISPANIC OR LATINO	Alive	Former User	1	0	[Not Available]	0	[Not Available]	No	1	TUMOR FREE	0	0	[Not Available]	NO	1	[Not Available]	[Not Available]	[Not Available]	[Not Available]	[Not Available]	1	[Not Available]	Preoperative	[Not Applicable]	Complete Remission/Response	44	No	[Not Available]	[Not Available]	[Not Available]	[Not Available]	[Not Available]	[Not Available]	Endometrioid Adenocarcinoma of Endocervix	[Not Available]	G1	2009	Biopsy (cervical / CT-guided / Other)	[Not Applicable]
2C736C5C-9D32-4522-ACFD-6620BC291ACE	TCGA-VS-A8EB	4/22/14	NO	YES	Female	Pre (<6 months since LMP AND no prior bilateral ovariectomy AND not on estrogen replacement)	153	64	WHITE	[Not Available]	Dead	Never Used	4	3	Cervical Cancer	1	[Not Available]	No	[Not Available]	WITH TUMOR	[Not Available]	[Not Available]	[Not Available]	NO	2	[Not Available]	[Not Available]	[Not Available]	[Not Available]	[Not Available]	1	[Not Available]	Pre-Adjuvant Therapy	[Not Applicable]	Progressive Disease	41	No	[Not Available]	[Not Available]	[Not Available]	[Not Available]	[Not Available]	[Not Available]	Cervical Squamous Cell Carcinoma	[Not Available]	GX	2010	Biopsy (cervical / CT-guided / Other)	[Not Applicable]
AFB5442E-0249-475B-8F82-CAE4E0268AD1	TCGA-VS-A8EC	4/22/14	NO	YES	Female	Peri (6-12 months since last menstrual period)	154	46	WHITE	[Not Available]	Alive	Former User	4	3	[Not Available]	1	[Not Available]	No	[Not Available]	TUMOR FREE	[Not Available]	[Not Available]	[Not Available]	NO	[Not Available]	[Not Available]	[Not Available]	[Not Available]	[Not Available]	[Not Available]	1	[Not Available]	[Not Available]	[Not Applicable]	Complete Remission/Response	55	No	[Not Available]	[Not Available]	[Not Available]	[Not Available]	[Not Available]	[Not Available]	Cervical Squamous Cell Carcinoma	[Not Available]	G2	2011	Biopsy (cervical / CT-guided / Other)	[Not Applicable]
B0B293C1-BD7E-4BA8-9F44-47398488EF2C	TCGA-VS-A8EG	4/22/14	NO	YES	Female	Peri (6-12 months since last menstrual period)	160	66	[Not Available]	[Not Available]	Alive	Current User	5	4	[Not Available]	1	[Not Available]	No	[Not Available]	TUMOR FREE	[Not Available]	[Not Available]	[Not Available]	NO	1	[Not Available]	[Not Available]	[Not Available]	[Not Available]	[Not Available]	0	[Not Available]	Pre-Adjuvant Therapy	[Not Applicable]	Complete Remission/Response	36	No	[Not Available]	[Not Available]	[Not Available]	[Not Available]	[Not Available]	[Not Available]	Cervical Squamous Cell Carcinoma	[Not Available]	GX	2011	Biopsy (cervical / CT-guided / Other)	[Not Applicable]
05026179-B1DA-411E-A286-89727B1AE380	TCGA-VS-A8EH	4/22/14	NO	YES	Female	Peri (6-12 months since last menstrual period)	157	44	[Not Available]	[Not Available]	Alive	Never Used	4	4	[Not Available]	[Not Available]	[Not Available]	No	[Not Available]	TUMOR FREE	[Not Available]	[Not Available]	[Not Available]	NO	2	39	[Not Available]	[Not Available]	3	[Not Available]	2	[Not Available]	Pre-Adjuvant Therapy	[Not Applicable]	Complete Remission/Response	56	No	[Not Available]	[Not Available]	[Not Available]	[Not Available]	[Not Available]	[Not Available]	Cervical Squamous Cell Carcinoma	[Not Available]	G2	2012	Biopsy (cervical / CT-guided / Other)	[Not Applicable]
7B228C3B-E604-41A1-9B76-8DD3D5A59FFE	TCGA-VS-A8EI	4/22/14	NO	YES	Female	Pre (<6 months since LMP AND no prior bilateral ovariectomy AND not on estrogen replacement)	158	58	WHITE	[Not Available]	Alive	Never Used	4	4	[Not Available]	[Not Available]	[Not Available]	No	[Not Available]	TUMOR FREE	[Not Available]	[Not Available]	[Not Available]	NO	1	[Not Available]	[Not Available]	[Not Available]	[Not Available]	[Not Available]	1	[Not Available]	Pre-Adjuvant Therapy	[Not Applicable]	Complete Remission/Response	38	No	[Not Available]	[Not Available]	[Not Available]	[Not Available]	[Not Available]	[Not Available]	Cervical Squamous Cell Carcinoma	[Not Available]	GX	2012	Biopsy (cervical / CT-guided / Other)	[Not Applicable]
2E08A89E-4035-4782-B54F-F98EEF5DB80D	TCGA-VS-A8EJ	4/22/14	NO	YES	Female	Post (prior bilateral ovariectomy OR >12 mo since LMP with no prior hysterectomy)	167	113	WHITE	[Not Available]	Dead	[Not Available]	3	3	Cervical Cancer	[Not Available]	[Not Available]	No	[Not Available]	WITH TUMOR	[Not Available]	[Not Available]	[Not Available]	NO	1	[Not Available]	[Not Available]	[Not Available]	[Not Available]	[Not Available]	0	[Not Available]	Pre-Adjuvant Therapy	[Not Applicable]	Progressive Disease	60	No	[Not Available]	[Not Available]	[Not Available]	[Not Available]	[Not Available]	[Not Available]	Cervical Squamous Cell Carcinoma	[Not Available]	G3	2008	Biopsy (cervical / CT-guided / Other)	[Not Applicable]
D9C2CA21-F1A6-4CF4-BE28-6C2492DD38E5	TCGA-VS-A8EK	4/22/14	NO	YES	Female	[Not Available]	153	50	WHITE	[Not Available]	Dead	[Not Available]	6	5	Cervical Cancer	1	[Not Available]	No	[Not Available]	WITH TUMOR	[Not Available]	[Not Available]	[Not Available]	NO	[Not Available]	[Not Available]	[Not Available]	[Not Available]	[Not Available]	[Not Available]	0	[Not Available]	Pre-Adjuvant Therapy	[Not Applicable]	Partial Remission/Response	65	No	[Not Available]	[Not Available]	[Not Available]	[Not Available]	[Not Available]	[Not Available]	Cervical Squamous Cell Carcinoma	[Not Available]	G2	2008	Biopsy (cervical / CT-guided / Other)	[Not Applicable]
E0A5D99B-B58B-4301-B2DC-A767D90059B1	TCGA-VS-A8EL	4/22/14	NO	YES	Female	Pre (<6 months since LMP AND no prior bilateral ovariectomy AND not on estrogen replacement)	166	78	BLACK OR AFRICAN AMERICAN	[Not Available]	Alive	Former User	3	3	[Not Available]	[Not Available]	[Not Available]	No	[Not Available]	TUMOR FREE	[Not Available]	[Not Available]	[Not Available]	NO	1	[Not Available]	[Not Available]	[Not Available]	[Not Available]	[Not Available]	1	[Not Available]	Preoperative	[Not Applicable]	Complete Remission/Response	38	No	[Not Available]	[Not Available]	[Not Available]	[Not Available]	[Not Available]	[Not Available]	Cervical Squamous Cell Carcinoma	[Not Available]	G3	2009	Biopsy (cervical / CT-guided / Other)	[Not Applicable]
6C3C8219-74AB-4E54-81F5-84D4D5884252	TCGA-VS-A8Q8	3/31/14	NO	YES	Female	Pre (<6 months since LMP AND no prior bilateral ovariectomy AND not on estrogen replacement)	166	92	WHITE	[Not Available]	Dead	Former User	0	[Not Available]	Cervical Cancer	[Not Available]	[Not Available]	No	[Not Available]	WITH TUMOR	[Not Available]	[Not Available]	[Not Available]	NO	1	[Not Available]	[Not Available]	[Not Available]	[Not Available]	[Not Available]	0	[Not Available]	Preoperative	[Not Applicable]	Progressive Disease	26	No	[Not Available]	[Not Available]	[Not Available]	[Not Available]	[Not Available]	[Not Available]	Cervical Squamous Cell Carcinoma	[Not Available]	G2	2010	Other method, specify:	Surgery
5798D741-C198-4C14-BCC2-E3B17CAF1BE3	TCGA-VS-A8Q9	3/30/14	NO	YES	Female	Post (prior bilateral ovariectomy OR >12 mo since LMP with no prior hysterectomy)	150	49	WHITE	[Not Available]	Alive	[Not Available]	12	8	[Not Available]	4	[Not Available]	No	[Not Available]	TUMOR FREE	[Not Available]	[Not Available]	[Not Available]	NO	1	[Not Available]	[Not Available]	[Not Available]	[Not Available]	[Not Available]	1	[Not Available]	Pre-Adjuvant Therapy	[Not Applicable]	Complete Remission/Response	79	No	[Not Available]	[Not Available]	[Not Available]	[Not Available]	[Not Available]	[Not Available]	Cervical Squamous Cell Carcinoma	[Not Available]	G2	2010	Biopsy (cervical / CT-guided / Other)	[Not Applicable]
1A3D5555-7013-4F06-878A-98944F075B63	TCGA-VS-A8QA	3/30/14	NO	YES	Female	Peri (6-12 months since last menstrual period)	160	67	[Not Available]	[Not Available]	Alive	[Not Available]	2	2	[Not Available]	[Not Available]	[Not Available]	No	[Not Available]	TUMOR FREE	[Not Available]	[Not Available]	[Not Available]	NO	1	[Not Available]	[Not Available]	[Not Available]	[Not Available]	[Not Available]	0	[Not Available]	Preoperative	[Not Applicable]	Complete Remission/Response	44	No	[Not Available]	[Not Available]	[Not Available]	[Not Available]	[Not Available]	[Not Available]	Cervical Squamous Cell Carcinoma	[Not Available]	GX	2011	Biopsy (cervical / CT-guided / Other)	[Not Applicable]
CB695FDD-381E-4C00-836E-0BA27E32176B	TCGA-VS-A8QC	3/30/14	NO	YES	Female	Peri (6-12 months since last menstrual period)	152	90	WHITE	[Not Available]	Dead	[Not Available]	7	7	Cervical Cancer	[Not Available]	[Not Available]	No	[Not Available]	WITH TUMOR	[Not Available]	[Not Available]	[Not Available]	NO	2	[Not Available]	[Not Available]	[Not Available]	[Not Available]	[Not Available]	2	[Not Available]	Pre-Adjuvant Therapy	[Not Applicable]	Progressive Disease	51	No	[Not Available]	[Not Available]	[Not Available]	[Not Available]	[Not Available]	[Not Available]	Cervical Squamous Cell Carcinoma	[Not Available]	G2	2009	Biopsy (cervical / CT-guided / Other)	[Not Applicable]
21254CB0-68F3-4ECC-8D9A-73FB0E994C5B	TCGA-VS-A8QF	3/30/14	NO	YES	Female	Pre (<6 months since LMP AND no prior bilateral ovariectomy AND not on estrogen replacement)	159	68	WHITE	[Not Available]	Alive	[Not Available]	5	5	[Not Available]	[Not Available]	[Not Available]	No	[Not Available]	TUMOR FREE	[Not Available]	[Not Available]	[Not Available]	NO	4	12	2010	[Not Available]	[Not Available]	[Not Available]	0	[Not Available]	Pre-Adjuvant Therapy	[Not Applicable]	Complete Remission/Response	42	No	[Not Available]	[Not Available]	[Not Available]	[Not Available]	[Not Available]	[Not Available]	Cervical Squamous Cell Carcinoma	[Not Available]	G2	2010	Biopsy (cervical / CT-guided / Other)	[Not Applicable]
C4F61715-EE58-4799-A5F4-0F5E27C4093D	TCGA-VS-A8QH	3/30/14	NO	YES	Female	Post (prior bilateral ovariectomy OR >12 mo since LMP with no prior hysterectomy)	159	73	WHITE	[Not Available]	Dead	[Not Available]	4	3	Cervical Cancer	1	[Not Available]	No	[Not Available]	WITH TUMOR	[Not Available]	[Not Available]	[Not Available]	NO	1	[Not Available]	[Not Available]	[Not Available]	[Not Available]	[Not Available]	0	[Not Available]	Pre-Adjuvant Therapy	[Not Applicable]	Partial Remission/Response	76	No	[Not Available]	[Not Available]	[Not Available]	[Not Available]	[Not Available]	[Not Available]	Mucinous Adenocarcinoma of Endocervical Type	[Not Available]	G2	2010	Biopsy (cervical / CT-guided / Other)	[Not Applicable]
27D2B645-F1BF-4486-B0B5-273681B58625	TCGA-VS-A8QM	2004/1/14	NO	YES	Female	[Not Available]	163	53	[Not Available]	[Not Available]	Dead	[Not Available]	4	3	Cervical Cancer	1	[Not Available]	No	[Not Available]	WITH TUMOR	[Not Available]	[Not Available]	[Not Available]	NO	2	15	[Not Available]	[Not Available]	16	[Not Available]	0	[Not Available]	Pre-Adjuvant Therapy	[Not Applicable]	Progressive Disease	47	No	[Not Available]	[Not Available]	[Not Available]	[Not Available]	[Not Available]	[Not Available]	Cervical Squamous Cell Carcinoma	[Not Available]	GX	2009	Biopsy (cervical / CT-guided / Other)	[Not Applicable]
2F6A0E87-1E6C-41F3-93E0-3E505FA654B0	TCGA-VS-A94W	10/17/14	NO	YES	Female	Pre (<6 months since LMP AND no prior bilateral ovariectomy AND not on estrogen replacement)	156	79	WHITE	[Not Available]	Alive	Never Used	2	2	[Not Available]	[Not Available]	[Not Available]	No	[Not Available]	TUMOR FREE	[Not Available]	[Not Available]	[Not Available]	NO	1	[Not Available]	[Not Available]	[Not Available]	[Not Available]	[Not Available]	0	[Not Available]	Preoperative	[Not Applicable]	Complete Remission/Response	39	No	[Not Available]	[Not Available]	[Not Available]	[Not Available]	[Not Available]	[Not Available]	Cervical Squamous Cell Carcinoma	[Not Available]	G2	2011	Biopsy (cervical / CT-guided / Other)	[Not Applicable]
240EF385-DECC-48F7-A798-A81B4AB0410E	TCGA-VS-A94X	5/21/14	NO	YES	Female	[Not Available]	158	42	BLACK OR AFRICAN AMERICAN	[Not Available]	Dead	[Not Available]	3	3	Cervical Cancer	[Not Available]	[Not Available]	No	[Not Available]	WITH TUMOR	[Not Available]	[Not Available]	[Not Available]	NO	1	[Not Available]	[Not Available]	[Not Available]	[Not Available]	[Not Available]	0	[Not Available]	Pre-Adjuvant Therapy	[Not Applicable]	Partial Remission/Response	40	No	[Not Available]	[Not Available]	[Not Available]	[Not Available]	[Not Available]	[Not Available]	Cervical Squamous Cell Carcinoma	[Not Available]	G2	2010	Biopsy (cervical / CT-guided / Other)	[Not Applicable]
0E7F79CD-D188-42EA-BF96-4BA9E9B8606B	TCGA-VS-A94Y	5/27/14	NO	YES	Female	Pre (<6 months since LMP AND no prior bilateral ovariectomy AND not on estrogen replacement)	154	44	WHITE	[Not Available]	Dead	Current User	1	1	Cervical Cancer	[Not Available]	[Not Available]	No	[Not Available]	WITH TUMOR	[Not Available]	[Not Available]	[Not Available]	NO	2	44	[Not Available]	[Not Available]	1	[Not Available]	1	[Not Available]	Pre-Adjuvant Therapy	[Not Applicable]	Progressive Disease	47	No	[Not Available]	[Not Available]	[Not Available]	[Not Available]	[Not Available]	[Not Available]	Cervical Squamous Cell Carcinoma	[Not Available]	GX	2010	Biopsy (cervical / CT-guided / Other)	[Not Applicable]
69BABA9F-19C2-4947-95DC-0DD3412929BA	TCGA-VS-A94Z	5/21/14	NO	YES	Female	Pre (<6 months since LMP AND no prior bilateral ovariectomy AND not on estrogen replacement)	162	96	WHITE	[Not Available]	Alive	Never Used	4	3	[Not Available]	1	[Not Available]	No	[Not Available]	TUMOR FREE	[Not Available]	[Not Available]	[Not Available]	NO	4	27	2010	[Not Available]	2	[Not Available]	1	[Not Available]	Pre-Adjuvant Therapy	[Not Applicable]	Complete Remission/Response	38	No	[Not Available]	[Not Available]	[Not Available]	[Not Available]	[Not Available]	[Not Available]	Cervical Squamous Cell Carcinoma	[Not Available]	G2	2012	Biopsy (cervical / CT-guided / Other)	[Not Applicable]
3D190F07-2F79-4EE6-9F63-0B563DC05C74	TCGA-VS-A950	2010/1/14	NO	YES	Female	Pre (<6 months since LMP AND no prior bilateral ovariectomy AND not on estrogen replacement)	165	57	[Not Available]	[Not Available]	Alive	Never Used	3	3	[Not Available]	[Not Available]	[Not Available]	No	[Not Available]	WITH TUMOR	[Not Available]	[Not Available]	[Not Available]	NO	1	[Not Available]	[Not Available]	[Not Available]	[Not Available]	[Not Available]	0	[Not Available]	Pre-Adjuvant Therapy	[Not Applicable]	Partial Remission/Response	42	No	[Not Available]	[Not Available]	[Not Available]	[Not Available]	[Not Available]	[Not Available]	Cervical Squamous Cell Carcinoma	[Not Available]	G3	2011	Biopsy (cervical / CT-guided / Other)	[Not Applicable]
9FA42FE6-CCD0-4850-B08B-97B20ECEB8DF	TCGA-VS-A952	5/21/14	NO	YES	Female	Post (prior bilateral ovariectomy OR >12 mo since LMP with no prior hysterectomy)	155	65	WHITE	[Not Available]	Alive	Never Used	3	3	[Not Available]	[Not Available]	[Not Available]	No	[Not Available]	TUMOR FREE	[Not Available]	[Not Available]	[Not Available]	NO	1	[Not Available]	[Not Available]	[Not Available]	[Not Available]	[Not Available]	0	[Not Available]	Preoperative	[Not Applicable]	Complete Remission/Response	66	No	[Not Available]	[Not Available]	[Not Available]	[Not Available]	[Not Available]	[Not Available]	Mucinous Adenocarcinoma of Endocervical Type	[Not Available]	G2	2010	Biopsy (cervical / CT-guided / Other)	[Not Applicable]
DA901E97-3A1D-4952-8254-9C4E60D2812C	TCGA-VS-A953	10/17/14	NO	YES	Female	Post (prior bilateral ovariectomy OR >12 mo since LMP with no prior hysterectomy)	155	47	[Not Available]	[Not Available]	Dead	Never Used	11	11	Cervical Cancer	[Not Available]	[Not Available]	No	[Not Available]	WITH TUMOR	[Not Available]	[Not Available]	[Not Available]	NO	1	[Not Available]	[Not Available]	[Not Available]	[Not Available]	[Not Available]	0	[Not Available]	Pre-Adjuvant Therapy	[Not Applicable]	Partial Remission/Response	63	No	[Not Available]	[Not Available]	[Not Available]	[Not Available]	[Not Available]	[Not Available]	Cervical Squamous Cell Carcinoma	[Not Available]	GX	2010	Biopsy (cervical / CT-guided / Other)	[Not Applicable]
9BA72A77-AEF0-4788-8072-60C28902E55D	TCGA-VS-A954	5/21/14	NO	YES	Female	Post (prior bilateral ovariectomy OR >12 mo since LMP with no prior hysterectomy)	160	58	[Not Available]	[Not Available]	Alive	Never Used	10	10	[Not Available]	[Not Available]	[Not Available]	No	[Not Available]	TUMOR FREE	[Not Available]	[Not Available]	[Not Available]	NO	1	[Not Available]	[Not Available]	[Not Available]	[Not Available]	[Not Available]	1	[Not Available]	Pre-Adjuvant Therapy	[Not Applicable]	Complete Remission/Response	67	No	[Not Available]	[Not Available]	[Not Available]	[Not Available]	[Not Available]	[Not Available]	Cervical Squamous Cell Carcinoma	[Not Available]	G2	2010	Biopsy (cervical / CT-guided / Other)	[Not Applicable]
CB31B3CE-8595-4D75-9436-BB59E95C3A19	TCGA-VS-A957	5/27/14	NO	YES	Female	Post (prior bilateral ovariectomy OR >12 mo since LMP with no prior hysterectomy)	156	91	WHITE	[Not Available]	Alive	Never Used	4	4	[Not Available]	[Not Available]	[Not Available]	No	[Not Available]	TUMOR FREE	[Not Available]	[Not Available]	[Not Available]	NO	1	[Not Available]	[Not Available]	[Not Available]	[Not Available]	[Not Available]	0	[Not Available]	Pre-Adjuvant Therapy	[Not Applicable]	Complete Remission/Response	64	No	[Not Available]	[Not Available]	[Not Available]	[Not Available]	[Not Available]	[Not Available]	Cervical Squamous Cell Carcinoma	[Not Available]	G3	2010	Biopsy (cervical / CT-guided / Other)	[Not Applicable]
97CF3268-9756-4659-9E98-F200F96A91F4	TCGA-VS-A958	5/21/14	NO	YES	Female	Pre (<6 months since LMP AND no prior bilateral ovariectomy AND not on estrogen replacement)	151	61	WHITE	[Not Available]	Alive	Never Used	4	4	[Not Available]	[Not Available]	[Not Available]	No	[Not Available]	TUMOR FREE	[Not Available]	[Not Available]	[Not Available]	NO	1	[Not Available]	[Not Available]	[Not Available]	[Not Available]	[Not Available]	1	[Not Available]	Pre-Adjuvant Therapy	[Not Applicable]	Complete Remission/Response	46	No	[Not Available]	[Not Available]	[Not Available]	[Not Available]	[Not Available]	[Not Available]	Cervical Squamous Cell Carcinoma	[Not Available]	G2	2010	Biopsy (cervical / CT-guided / Other)	[Not Applicable]
F2BEA37E-0D19-49E1-91A0-A4DE4DFA2D35	TCGA-VS-A959	5/27/14	NO	YES	Female	Post (prior bilateral ovariectomy OR >12 mo since LMP with no prior hysterectomy)	145	47	[Not Available]	[Not Available]	Alive	Never Used	11	11	[Not Available]	[Not Available]	[Not Available]	No	[Not Available]	TUMOR FREE	[Not Available]	[Not Available]	[Not Available]	NO	1	[Not Available]	[Not Available]	[Not Available]	[Not Available]	[Not Available]	[Not Available]	[Not Available]	[Not Available]	[Not Applicable]	Complete Remission/Response	76	No	[Not Available]	[Not Available]	[Not Available]	[Not Available]	[Not Available]	[Not Available]	Cervical Squamous Cell Carcinoma	[Not Available]	G3	2010	Biopsy (cervical / CT-guided / Other)	[Not Applicable]
939ABCA1-8BD0-4271-9A9B-666764EEB3B6	TCGA-VS-A9U5	2008/11/14	NO	YES	Female	Peri (6-12 months since last menstrual period)	162	74	WHITE	[Not Available]	Alive	Never Used	3	3	[Not Available]	[Not Available]	[Not Available]	No	[Not Available]	TUMOR FREE	[Not Available]	[Not Available]	[Not Available]	NO	1	[Not Available]	[Not Available]	[Not Available]	[Not Available]	[Not Available]	0	[Not Available]	Pre-Adjuvant Therapy	[Not Applicable]	Complete Remission/Response	57	No	[Not Available]	[Not Available]	[Not Available]	[Not Available]	[Not Available]	[Not Available]	Cervical Squamous Cell Carcinoma	[Not Available]	G3	2010	Biopsy (cervical / CT-guided / Other)	[Not Applicable]
98784BBE-E286-48DF-838D-1A88040658BF	TCGA-VS-A9U6	2008/11/14	NO	YES	Female	Pre (<6 months since LMP AND no prior bilateral ovariectomy AND not on estrogen replacement)	156	66	WHITE	[Not Available]	Alive	Never Used	2	1	[Not Available]	1	[Not Available]	No	[Not Available]	WITH TUMOR	[Not Available]	[Not Available]	[Not Available]	NO	1	[Not Available]	[Not Available]	[Not Available]	[Not Available]	[Not Available]	1	[Not Available]	Preoperative	[Not Applicable]	Stable Disease	52	No	[Not Available]	[Not Available]	[Not Available]	[Not Available]	[Not Available]	[Not Available]	Cervical Squamous Cell Carcinoma	Non-keratinizing squamous cell carcinoma	GX	2011	Biopsy (cervical / CT-guided / Other)	[Not Applicable]
6D01421E-D533-4967-8422-97FBC0FB0895	TCGA-VS-A9U7	2008/11/14	NO	YES	Female	Pre (<6 months since LMP AND no prior bilateral ovariectomy AND not on estrogen replacement)	157	82	WHITE	[Not Available]	Alive	Current User	3	1	[Not Available]	2	[Not Available]	No	[Not Available]	TUMOR FREE	[Not Available]	[Not Available]	[Not Available]	NO	1	[Not Available]	[Not Available]	[Not Available]	[Not Available]	[Not Available]	0	[Not Available]	Preoperative	[Not Applicable]	Complete Remission/Response	30	No	[Not Available]	[Not Available]	[Not Available]	[Not Available]	[Not Available]	[Not Available]	Cervical Squamous Cell Carcinoma	[Not Available]	G3	2011	Biopsy (cervical / CT-guided / Other)	[Not Applicable]
60117B70-36C0-41BB-A9FC-85DB8FA10102	TCGA-VS-A9UA	2008/11/14	NO	YES	Female	Post (prior bilateral ovariectomy OR >12 mo since LMP with no prior hysterectomy)	134	88	WHITE	[Not Available]	Alive	Never Used	2	2	[Not Available]	[Not Available]	[Not Available]	No	[Not Available]	TUMOR FREE	[Not Available]	[Not Available]	[Not Available]	NO	1	[Not Available]	[Not Available]	[Not Available]	[Not Available]	[Not Available]	2	[Not Available]	Pre-Adjuvant Therapy	[Not Applicable]	Complete Remission/Response	60	No	[Not Available]	[Not Available]	[Not Available]	[Not Available]	[Not Available]	[Not Available]	Cervical Squamous Cell Carcinoma	[Not Available]	G3	2012	Biopsy (cervical / CT-guided / Other)	[Not Applicable]
CA242B4C-B879-4E13-A1E7-84C984067189	TCGA-VS-A9UB	2010/1/14	NO	YES	Female	Post (prior bilateral ovariectomy OR >12 mo since LMP with no prior hysterectomy)	166	79	[Not Available]	[Not Available]	Alive	Never Used	11	11	[Not Available]	[Not Available]	[Not Available]	No	[Not Available]	TUMOR FREE	[Not Available]	[Not Available]	[Not Available]	NO	1	[Not Available]	[Not Available]	[Not Available]	[Not Available]	[Not Available]	1	[Not Available]	Preoperative	[Not Applicable]	Complete Remission/Response	54	No	[Not Available]	[Not Available]	[Not Available]	[Not Available]	[Not Available]	[Not Available]	Cervical Squamous Cell Carcinoma	[Not Available]	G3	2012	Biopsy (cervical / CT-guided / Other)	[Not Applicable]
CCA23650-1B06-4977-91E8-F35E73E70C48	TCGA-VS-A9UC	2008/11/14	NO	YES	Female	Peri (6-12 months since last menstrual period)	153	76	[Not Available]	[Not Available]	Alive	Never Used	4	4	[Not Available]	[Not Available]	[Not Available]	No	[Not Available]	WITH TUMOR	[Not Available]	[Not Available]	[Not Available]	NO	1	[Not Available]	[Not Available]	[Not Available]	[Not Available]	[Not Available]	1	[Not Available]	Pre-Adjuvant Therapy	[Not Applicable]	Stable Disease	32	No	[Not Available]	[Not Available]	[Not Available]	[Not Available]	[Not Available]	[Not Available]	Cervical Squamous Cell Carcinoma	[Not Available]	G2	2012	Biopsy (cervical / CT-guided / Other)	[Not Applicable]
60CFA29F-4770-4EE4-AA37-787F53155662	TCGA-VS-A9UD	2008/11/14	NO	YES	Female	Post (prior bilateral ovariectomy OR >12 mo since LMP with no prior hysterectomy)	161	64	WHITE	[Not Available]	Alive	Never Used	14	9	[Not Available]	5	[Not Available]	No	[Not Available]	TUMOR FREE	[Not Available]	[Not Available]	[Not Available]	NO	1	[Not Available]	[Not Available]	[Not Available]	[Not Available]	[Not Available]	0	[Not Available]	Pre-Adjuvant Therapy	[Not Applicable]	Complete Remission/Response	73	No	[Not Available]	[Not Available]	[Not Available]	[Not Available]	[Not Available]	[Not Available]	Cervical Squamous Cell Carcinoma	Keratinizing squamous cell carcinoma	G2	2013	Biopsy (cervical / CT-guided / Other)	[Not Applicable]
6949C03E-067A-49A5-B48D-E9380A1B0B27	TCGA-VS-A9UH	8/20/14	NO	YES	Female	[Not Available]	[Not Available]	[Not Available]	BLACK OR AFRICAN AMERICAN	[Not Available]	Alive	Never Used	3	3	[Not Available]	[Not Available]	[Not Available]	No	[Not Available]	TUMOR FREE	[Not Available]	[Not Available]	[Not Available]	NO	1	[Not Available]	[Not Available]	[Not Available]	[Not Available]	[Not Available]	2	[Not Available]	Pre-Adjuvant Therapy	[Not Applicable]	Complete Remission/Response	53	No	[Not Available]	[Not Available]	[Not Available]	[Not Available]	[Not Available]	[Not Available]	Cervical Squamous Cell Carcinoma	[Not Available]	GX	2010	Biopsy (cervical / CT-guided / Other)	[Not Applicable]
9C516D28-BEF2-4334-BDDA-97950BD95AC0	TCGA-VS-A9UI	2008/11/14	NO	YES	Female	Post (prior bilateral ovariectomy OR >12 mo since LMP with no prior hysterectomy)	[Not Available]	70	WHITE	[Not Available]	Dead	Never Used	5	5	[Not Available]	[Not Available]	[Not Available]	No	[Not Available]	TUMOR FREE	[Not Available]	[Not Available]	[Not Available]	NO	1	[Not Available]	[Not Available]	[Not Available]	[Not Available]	[Not Available]	1	[Not Available]	Pre-Adjuvant Therapy	[Not Applicable]	Complete Remission/Response	76	No	[Not Available]	[Not Available]	[Not Available]	[Not Available]	[Not Available]	[Not Available]	Cervical Squamous Cell Carcinoma	[Not Available]	GX	2011	Biopsy (cervical / CT-guided / Other)	[Not Applicable]
78C62970-4B48-4DC4-9042-5F48F42818EC	TCGA-VS-A9UJ	2009/9/14	NO	YES	Female	Pre (<6 months since LMP AND no prior bilateral ovariectomy AND not on estrogen replacement)	[Not Available]	[Not Available]	[Not Available]	[Not Available]	Dead	Current User	0	[Not Available]	Cervical Cancer	[Not Available]	[Not Available]	No	[Not Available]	WITH TUMOR	[Not Available]	[Not Available]	[Not Available]	[Not Available]	1	[Not Available]	[Not Available]	[Not Available]	[Not Available]	[Not Available]	1	[Not Available]	Other	No treatment performed	[Not Available]	55	No	[Not Available]	[Not Available]	[Not Available]	[Not Available]	[Not Available]	[Not Available]	Cervical Squamous Cell Carcinoma	[Not Available]	GX	2012	Biopsy (cervical / CT-guided / Other)	[Not Applicable]
7ABACA8F-962E-4F9D-B63F-26C131BF5961	TCGA-VS-A9UL	2009/5/14	NO	YES	Female	Post (prior bilateral ovariectomy OR >12 mo since LMP with no prior hysterectomy)	149	56	WHITE	[Not Available]	Dead	Never Used	5	5	Cervical Cancer	[Not Available]	[Not Available]	No	[Not Available]	WITH TUMOR	[Not Available]	[Not Available]	[Not Available]	NO	1	[Not Available]	[Not Available]	[Not Available]	[Not Available]	[Not Available]	1	[Not Available]	Pre-Adjuvant Therapy	[Not Applicable]	Progressive Disease	79	No	[Not Available]	[Not Available]	[Not Available]	[Not Available]	[Not Available]	[Not Available]	Cervical Squamous Cell Carcinoma	[Not Available]	G3	2010	Biopsy (cervical / CT-guided / Other)	[Not Applicable]
EE2C9743-EAA1-4F0D-8D35-E96686AC3913	TCGA-VS-A9UM	2009/9/14	NO	YES	Female	Peri (6-12 months since last menstrual period)	160	75	BLACK OR AFRICAN AMERICAN	[Not Available]	Dead	Never Used	5	5	[Not Available]	[Not Available]	[Not Available]	No	[Not Available]	TUMOR FREE	[Not Available]	[Not Available]	[Not Available]	NO	1	[Not Available]	[Not Available]	[Not Available]	[Not Available]	[Not Available]	0	[Not Available]	Pre-Adjuvant Therapy	[Not Applicable]	Complete Remission/Response	39	No	[Not Available]	[Not Available]	[Not Available]	[Not Available]	[Not Available]	[Not Available]	Cervical Squamous Cell Carcinoma	[Not Available]	G2	2011	Biopsy (cervical / CT-guided / Other)	[Not Applicable]
4DA121DA-9193-4AC5-8206-03CB1F7C2C14	TCGA-VS-A9UO	2008/11/14	NO	YES	Female	Peri (6-12 months since last menstrual period)	159	40	WHITE	[Not Available]	Alive	Never Used	1	1	[Not Available]	[Not Available]	[Not Available]	No	[Not Available]	TUMOR FREE	[Not Available]	[Not Available]	[Not Available]	NO	1	[Not Available]	[Not Available]	[Not Available]	[Not Available]	[Not Available]	1	[Not Available]	Preoperative	[Not Applicable]	Complete Remission/Response	43	No	[Not Available]	[Not Available]	[Not Available]	[Not Available]	[Not Available]	[Not Available]	Mucinous Adenocarcinoma of Endocervical Type	[Not Available]	G2	2011	Biopsy (cervical / CT-guided / Other)	[Not Applicable]
F0CFAACC-30E5-4E54-B33A-F0FD5DAD620E	TCGA-VS-A9UP	2008/11/14	NO	YES	Female	Peri (6-12 months since last menstrual period)	155	68	[Not Available]	[Not Available]	Alive	Never Used	4	4	[Not Available]	[Not Available]	[Not Available]	No	[Not Available]	WITH TUMOR	[Not Available]	[Not Available]	[Not Available]	NO	2	34	[Not Available]	[Not Available]	1	[Not Available]	1	[Not Available]	Pre-Adjuvant Therapy	[Not Applicable]	Complete Remission/Response	43	No	[Not Available]	[Not Available]	[Not Available]	[Not Available]	[Not Available]	[Not Available]	Mucinous Adenocarcinoma of Endocervical Type	[Not Available]	G3	2011	Biopsy (cervical / CT-guided / Other)	[Not Applicable]
2C600A58-98ED-4572-9B6F-EDBA2719790C	TCGA-VS-A9UQ	2008/11/14	NO	YES	Female	Peri (6-12 months since last menstrual period)	160	72	[Not Available]	[Not Available]	Alive	Current User	4	[Not Available]	[Not Available]	4	[Not Available]	No	[Not Available]	TUMOR FREE	[Not Available]	[Not Available]	[Not Available]	NO	1	[Not Available]	[Not Available]	[Not Available]	[Not Available]	[Not Available]	[Not Available]	[Not Available]	[Not Available]	[Not Applicable]	Complete Remission/Response	32	No	[Not Available]	[Not Available]	[Not Available]	[Not Available]	[Not Available]	[Not Available]	Mucinous Adenocarcinoma of Endocervical Type	[Not Available]	G2	2011	Biopsy (cervical / CT-guided / Other)	[Not Applicable]
ADC60720-AC20-4E73-9C37-3AD3119C07D6	TCGA-VS-A9UR	2008/11/14	NO	YES	Female	[Not Available]	161	64	WHITE	[Not Available]	Alive	Never Used	5	5	[Not Available]	[Not Available]	[Not Available]	No	[Not Available]	TUMOR FREE	[Not Available]	[Not Available]	[Not Available]	NO	1	[Not Available]	[Not Available]	[Not Available]	[Not Available]	[Not Available]	1	[Not Available]	Pre-Adjuvant Therapy	[Not Applicable]	Complete Remission/Response	53	No	[Not Available]	[Not Available]	[Not Available]	[Not Available]	[Not Available]	[Not Available]	Mucinous Adenocarcinoma of Endocervical Type	[Not Available]	GX	2013	Biopsy (cervical / CT-guided / Other)	[Not Applicable]
A945FD96-FFB3-4787-BACD-60DA4560C8A5	TCGA-VS-A9UT	2010/1/14	NO	YES	Female	Post (prior bilateral ovariectomy OR >12 mo since LMP with no prior hysterectomy)	144	42	ASIAN	[Not Available]	Alive	Never Used	3	3	[Not Available]	[Not Available]	[Not Available]	No	[Not Available]	TUMOR FREE	[Not Available]	[Not Available]	[Not Available]	NO	1	[Not Available]	[Not Available]	[Not Available]	[Not Available]	[Not Available]	1	[Not Available]	Pre-Adjuvant Therapy	[Not Applicable]	Complete Remission/Response	72	No	[Not Available]	[Not Available]	[Not Available]	[Not Available]	[Not Available]	[Not Available]	Mucinous Adenocarcinoma of Endocervical Type	[Not Available]	G3	2013	Biopsy (cervical / CT-guided / Other)	[Not Applicable]
4770EC81-9174-4D2A-AF54-70C00696FB0B	TCGA-VS-A9UU	2010/1/14	NO	YES	Female	Pre (<6 months since LMP AND no prior bilateral ovariectomy AND not on estrogen replacement)	162	67	[Not Available]	[Not Available]	Alive	Current User	7	7	[Not Available]	[Not Available]	[Not Available]	No	[Not Available]	TUMOR FREE	[Not Available]	[Not Available]	[Not Available]	NO	2	23	[Not Available]	HIV	2	[Not Available]	0	[Not Available]	Pre-Adjuvant Therapy	[Not Applicable]	Complete Remission/Response	42	No	[Not Available]	[Not Available]	[Not Available]	[Not Available]	[Not Available]	[Not Available]	Cervical Squamous Cell Carcinoma	[Not Available]	G1	2013	Biopsy (cervical / CT-guided / Other)	[Not Applicable]
C9E4BAC6-0CAC-4FCA-A548-527DEAC5B880	TCGA-VS-A9UV	2008/11/14	NO	YES	Female	Post (prior bilateral ovariectomy OR >12 mo since LMP with no prior hysterectomy)	152	31	[Not Available]	[Not Available]	Dead	Never Used	5	5	Cervical Cancer	[Not Available]	[Not Available]	No	[Not Available]	WITH TUMOR	[Not Available]	[Not Available]	[Not Available]	NO	1	[Not Available]	[Not Available]	[Not Available]	[Not Available]	[Not Available]	1	[Not Available]	Other	The patient did not perform treatment	[Not Available]	74	No	[Not Available]	[Not Available]	[Not Available]	[Not Available]	[Not Available]	[Not Available]	Cervical Squamous Cell Carcinoma	[Not Available]	GX	2013	Biopsy (cervical / CT-guided / Other)	[Not Applicable]
A1B99260-8643-4CEF-95A0-3853D64762B7	TCGA-VS-A9UY	2009/5/14	NO	YES	Female	[Not Available]	163	46	[Not Available]	[Not Available]	Dead	[Not Available]	[Not Available]	[Not Available]	Cervical Cancer	[Not Available]	[Not Available]	No	[Not Available]	WITH TUMOR	[Not Available]	[Not Available]	[Not Available]	NO	1	[Not Available]	[Not Available]	[Not Available]	[Not Available]	[Not Available]	2	[Not Available]	Pre-Adjuvant Therapy	[Not Applicable]	Progressive Disease	29	No	[Not Available]	[Not Available]	[Not Available]	[Not Available]	[Not Available]	[Not Available]	Cervical Squamous Cell Carcinoma	Non-keratinizing squamous cell carcinoma	G2	2012	Biopsy (cervical / CT-guided / Other)	[Not Applicable]
6817BB3E-1F8A-457C-9AB0-31CCDA8B6868	TCGA-VS-A9UZ	8/20/14	NO	YES	Female	Peri (6-12 months since last menstrual period)	149	54	WHITE	[Not Available]	Alive	Never Used	4	4	[Not Available]	[Not Available]	[Not Available]	No	[Not Available]	TUMOR FREE	[Not Available]	[Not Available]	[Not Available]	NO	1	[Not Available]	[Not Available]	[Not Available]	[Not Available]	[Not Available]	[Not Available]	[Not Available]	[Not Available]	[Not Applicable]	Complete Remission/Response	61	No	[Not Available]	[Not Available]	[Not Available]	[Not Available]	[Not Available]	[Not Available]	Mucinous Adenocarcinoma of Endocervical Type	[Not Available]	G2	2009	Biopsy (cervical / CT-guided / Other)	[Not Applicable]
A5885835-9473-455A-BAC0-6FA43FA8A866	TCGA-VS-A9V0	2010/1/14	NO	YES	Female	Pre (<6 months since LMP AND no prior bilateral ovariectomy AND not on estrogen replacement)	158	76	[Not Available]	[Not Available]	Alive	Never Used	7	7	[Not Available]	[Not Available]	[Not Available]	No	[Not Available]	WITH TUMOR	[Not Available]	[Not Available]	[Not Available]	NO	4	27	2012	[Not Available]	4.5	[Not Available]	[Not Available]	[Not Available]	[Not Available]	[Not Applicable]	Complete Remission/Response	58	No	[Not Available]	[Not Available]	[Not Available]	[Not Available]	[Not Available]	[Not Available]	Mucinous Adenocarcinoma of Endocervical Type	[Not Available]	G3	2013	Biopsy (cervical / CT-guided / Other)	[Not Applicable]
A6A07BC7-AB1B-429D-81ED-D7A890C88E51	TCGA-VS-A9V1	2009/5/14	NO	YES	Female	Pre (<6 months since LMP AND no prior bilateral ovariectomy AND not on estrogen replacement)	155	45	WHITE	[Not Available]	Dead	Never Used	4	3	Cervical Cancer	1	[Not Available]	No	[Not Available]	WITH TUMOR	[Not Available]	[Not Available]	[Not Available]	NO	2	24	[Not Available]	[Not Available]	2.4	[Not Available]	[Not Available]	[Not Available]	[Not Available]	[Not Applicable]	Progressive Disease	46	No	[Not Available]	[Not Available]	[Not Available]	[Not Available]	[Not Available]	[Not Available]	Mucinous Adenocarcinoma of Endocervical Type	[Not Available]	G2	2013	Biopsy (cervical / CT-guided / Other)	[Not Applicable]
03804F9B-DF7C-462C-8984-8EB3A5ED4999	TCGA-VS-A9V2	2009/5/14	NO	YES	Female	Peri (6-12 months since last menstrual period)	156	49	WHITE	[Not Available]	Alive	Never Used	2	2	[Not Available]	[Not Available]	[Not Available]	No	[Not Available]	TUMOR FREE	[Not Available]	[Not Available]	[Not Available]	NO	1	[Not Available]	[Not Available]	[Not Available]	[Not Available]	[Not Available]	1	[Not Available]	Preoperative	[Not Applicable]	Complete Remission/Response	29	No	[Not Available]	[Not Available]	[Not Available]	[Not Available]	[Not Available]	[Not Available]	Cervical Squamous Cell Carcinoma	[Not Available]	G2	2013	Biopsy (cervical / CT-guided / Other)	[Not Applicable]
1CB1D2CA-DFA6-4C42-9DA9-C711DC5AAB5D	TCGA-VS-A9V3	2008/11/14	NO	YES	Female	[Not Available]	164	60	WHITE	[Not Available]	Alive	Former User	0	[Not Available]	[Not Available]	[Not Available]	[Not Available]	No	[Not Available]	TUMOR FREE	[Not Available]	[Not Available]	[Not Available]	NO	1	[Not Available]	[Not Available]	[Not Available]	[Not Available]	[Not Available]	1	[Not Available]	Pre-Adjuvant Therapy	[Not Applicable]	Complete Remission/Response	62	No	[Not Available]	[Not Available]	[Not Available]	[Not Available]	[Not Available]	[Not Available]	Cervical Squamous Cell Carcinoma	[Not Available]	G3	2013	Biopsy (cervical / CT-guided / Other)	[Not Applicable]
778389BA-C2E9-47D4-B133-6F4D0E689B34	TCGA-VS-A9V4	2010/1/14	NO	YES	Female	Post (prior bilateral ovariectomy OR >12 mo since LMP with no prior hysterectomy)	161	52	WHITE	[Not Available]	Dead	[Not Available]	3	3	Cervical Cancer	[Not Available]	[Not Available]	No	[Not Available]	WITH TUMOR	[Not Available]	[Not Available]	[Not Available]	NO	4	15	2013	[Not Available]	30	[Not Available]	2	[Not Available]	Pre-Adjuvant Therapy	[Not Applicable]	[Not Available]	63	Yes	[Not Available]	[Not Available]	[Not Available]	[Not Available]	[Not Available]	[Not Available]	Mucinous Adenocarcinoma of Endocervical Type	[Not Available]	G2	2013	Biopsy (cervical / CT-guided / Other)	[Not Applicable]
D3FF2AEB-46BE-4F54-8A8F-178EB921FBB6	TCGA-VS-A9V5	2010/1/14	NO	YES	Female	Pre (<6 months since LMP AND no prior bilateral ovariectomy AND not on estrogen replacement)	157	98	WHITE	[Not Available]	Dead	Never Used	1	1	[Not Available]	[Not Available]	[Not Available]	No	[Not Available]	WITH TUMOR	[Not Available]	[Not Available]	[Not Available]	NO	1	[Not Available]	[Not Available]	[Not Available]	[Not Available]	[Not Available]	1	[Not Available]	Pre-Adjuvant Therapy	[Not Applicable]	Progressive Disease	50	No	[Not Available]	[Not Available]	[Not Available]	[Not Available]	[Not Available]	[Not Available]	Mucinous Adenocarcinoma of Endocervical Type	[Not Available]	G2	2011	Biopsy (cervical / CT-guided / Other)	[Not Applicable]
173174F8-9D95-40B0-9F88-A4BF4CCB521B	TCGA-VS-AA62	11/13/14	NO	YES	Female	Peri (6-12 months since last menstrual period)	156	67	WHITE	[Not Available]	Dead	Current User	4	4	Cervical Cancer	[Not Available]	[Not Available]	No	[Not Available]	WITH TUMOR	[Not Available]	[Not Available]	[Not Available]	NO	1	[Not Available]	[Not Available]	[Not Available]	[Not Available]	[Not Available]	0	[Not Available]	Pre-Adjuvant Therapy	[Not Applicable]	Progressive Disease	51	No	[Not Available]	[Not Available]	[Not Available]	[Not Available]	[Not Available]	[Not Available]	Cervical Squamous Cell Carcinoma	[Not Available]	G2	2009	Biopsy (cervical / CT-guided / Other)	[Not Applicable]
48D81B1E-CD75-4B55-A0B2-C331BE2A88AE	TCGA-WL-A834	2003/6/14	NO	YES	Female	Pre (<6 months since LMP AND no prior bilateral ovariectomy AND not on estrogen replacement)	162	79	WHITE	NOT HISPANIC OR LATINO	Alive	Former User	3	2	[Not Available]	[Not Available]	[Not Available]	No	[Not Available]	TUMOR FREE	[Not Available]	[Not Available]	[Not Available]	NO	4	43	2012	[Not Available]	6.5	[Not Available]	[Not Available]	[Not Available]	[Not Available]	[Not Applicable]	[Not Available]	57	No	[Not Available]	[Not Available]	[Not Available]	[Not Available]	[Not Available]	[Not Available]	Cervical Squamous Cell Carcinoma	Non-keratinizing squamous cell carcinoma	G3	2012	Biopsy (cervical / CT-guided / Other)	[Not Applicable]
FFD8D31F-BC4B-4E19-BBAF-0E26E9F3A107	TCGA-XS-A8TJ	7/28/14	YES	NO	Female	Pre (<6 months since LMP AND no prior bilateral ovariectomy AND not on estrogen replacement)	146	51	BLACK OR AFRICAN AMERICAN	HISPANIC OR LATINO	Alive	Former User	2	1	[Not Available]	[Not Available]	[Not Available]	No	[Not Available]	TUMOR FREE	1	[Not Available]	[Not Available]	NO	5	[Not Available]	[Not Available]	[Not Available]	[Not Available]	[Not Available]	0	[Not Available]	Preoperative	[Not Applicable]	Complete Remission/Response	41	No	[Not Available]	[Not Available]	[Not Available]	[Not Available]	[Not Available]	[Not Available]	Cervical Squamous Cell Carcinoma	Non-keratinizing squamous cell carcinoma	G2	2012	Biopsy (cervical / CT-guided / Other)	[Not Applicable]
EB3BA1FB-8254-4C02-A982-507F075CBAC1	TCGA-ZJ-A8QO	12/19/14	NO	YES	Female	[Not Available]	[Not Available]	[Not Available]	[Not Available]	[Not Available]	Alive	[Not Available]	[Not Available]	[Not Available]	[Not Available]	[Not Available]	[Not Available]	No	[Not Available]	[Not Available]	[Not Available]	[Not Available]	[Not Available]	[Not Available]	[Not Available]	[Not Available]	[Not Available]	[Not Available]	[Not Available]	[Not Available]	[Not Available]	[Not Available]	[Not Available]	[Not Applicable]	[Not Available]	73	No	[Not Available]	[Not Available]	[Not Available]	[Not Available]	[Not Available]	[Not Available]	Cervical Squamous Cell Carcinoma	Non-keratinizing squamous cell carcinoma	[Not Available]	2007	Biopsy (cervical / CT-guided / Other)	[Not Applicable]
B12DEB95-6AA1-49CB-A3C5-A711D42D6FB9	TCGA-ZJ-A8QQ	2/25/14	NO	YES	Female	Post (prior bilateral ovariectomy OR >12 mo since LMP with no prior hysterectomy)	158	71	WHITE	NOT HISPANIC OR LATINO	Alive	Never Used	0	[Not Available]	[Not Available]	[Not Available]	[Not Available]	No	[Not Available]	TUMOR FREE	[Not Available]	[Not Available]	[Not Available]	NO	2	11	[Not Available]	[Not Available]	20	[Not Available]	0	[Not Available]	Preoperative	[Not Applicable]	Complete Remission/Response	24	No	[Not Available]	[Not Available]	[Not Available]	[Not Available]	[Not Available]	[Not Available]	Cervical Squamous Cell Carcinoma	Non-keratinizing squamous cell carcinoma	GX	2007	Biopsy (cervical / CT-guided / Other)	[Not Applicable]
DB44488E-4ED0-4082-BCA0-BBFD22FF0537	TCGA-ZJ-A8QR	2/25/14	NO	YES	Female	Pre (<6 months since LMP AND no prior bilateral ovariectomy AND not on estrogen replacement)	[Not Available]	58	NATIVE HAWAIIAN OR OTHER PACIFIC ISLANDER	NOT HISPANIC OR LATINO	Dead	[Not Available]	[Not Available]	[Not Available]	[Not Available]	[Not Available]	[Not Available]	No	[Not Available]	[Not Available]	[Not Available]	[Not Available]	[Not Available]	NO	2	36	2009	[Not Available]	0.4	[Not Available]	0	[Not Available]	Preoperative	[Not Applicable]	[Not Available]	38	No	[Not Available]	[Not Available]	[Not Available]	[Not Available]	[Not Available]	[Not Available]	Cervical Squamous Cell Carcinoma	Keratinizing squamous cell carcinoma	GX	2007	Biopsy (cervical / CT-guided / Other)	[Not Applicable]
13D72130-604C-4D79-95CC-53C2E25D91B0	TCGA-ZJ-AAX4	12/19/14	NO	YES	Female	[Not Available]	170	77	WHITE	NOT HISPANIC OR LATINO	Alive	Never Used	3	3	[Not Available]	[Not Available]	[Not Available]	No	[Not Available]	[Not Available]	[Not Available]	[Not Available]	[Not Available]	[Not Available]	4	23	1949	[Not Available]	0.57	[Not Available]	[Not Available]	[Not Available]	[Not Available]	[Not Applicable]	[Not Available]	85	Yes	[Not Available]	[Not Available]	[Not Available]	[Not Available]	[Not Available]	[Not Available]	Cervical Squamous Cell Carcinoma	Non-keratinizing squamous cell carcinoma	G3	2008	Biopsy (cervical / CT-guided / Other)	[Not Applicable]
B5F0E361-D67D-4FA9-9916-43623DAFB10F	TCGA-ZJ-AAX8	12/19/14	NO	YES	Female	[Not Available]	[Not Available]	[Not Available]	[Not Available]	[Not Available]	Alive	[Not Available]	[Not Available]	[Not Available]	[Not Available]	[Not Available]	[Not Available]	No	[Not Available]	[Not Available]	[Not Available]	[Not Available]	[Not Available]	[Not Available]	[Not Available]	[Not Available]	[Not Available]	[Not Available]	[Not Available]	[Not Available]	[Not Available]	[Not Available]	[Not Available]	[Not Applicable]	[Not Available]	58	No	[Not Available]	[Not Available]	[Not Available]	[Not Available]	[Not Available]	[Not Available]	Cervical Squamous Cell Carcinoma	Non-keratinizing squamous cell carcinoma	G2	2009	Biopsy (cervical / CT-guided / Other)	[Not Applicable]
E8DE2228-3AAA-48AD-A2E4-2940280AF6FD	TCGA-ZJ-AAXA	12/30/14	NO	YES	Female	[Not Available]	155	78	WHITE	NOT HISPANIC OR LATINO	Alive	[Not Available]	4	4	[Not Available]	[Not Available]	[Not Available]	No	[Not Available]	[Not Available]	[Not Available]	[Not Available]	[Not Available]	[Not Available]	3	18	1989	[Not Available]	26	[Not Available]	[Not Available]	[Not Available]	[Not Available]	[Not Applicable]	[Not Available]	64	No	[Not Available]	[Not Available]	[Not Available]	[Not Available]	[Not Available]	[Not Available]	Cervical Squamous Cell Carcinoma	Non-keratinizing squamous cell carcinoma	G2	2009	Cone Biopsy / LEEP	[Not Applicable]
88F0AA4A-6BFD-4573-B136-58F84F867F10	TCGA-ZJ-AAXB	12/31/14	NO	YES	Female	[Not Available]	163	97	WHITE	NOT HISPANIC OR LATINO	Alive	[Not Available]	3	3	[Not Available]	[Not Available]	[Not Available]	No	[Not Available]	[Not Available]	[Not Available]	[Not Available]	[Not Available]	[Not Available]	1	[Not Available]	[Not Available]	[Not Available]	[Not Available]	[Not Available]	[Not Available]	[Not Available]	[Not Available]	[Not Applicable]	[Not Available]	42	No	[Not Available]	[Not Available]	[Not Available]	[Not Available]	[Not Available]	[Not Available]	Endocervical Adenocarcinoma of the Usual Type	[Not Available]	G3	2009	Biopsy (cervical / CT-guided / Other)	[Not Applicable]
AF33DF2E-9737-4F63-952C-858A70AA589C	TCGA-ZJ-AAXD	12/30/14	NO	YES	Female	[Not Available]	[Not Available]	[Not Available]	[Not Available]	[Not Available]	Alive	[Not Available]	[Not Available]	[Not Available]	[Not Available]	[Not Available]	[Not Available]	No	[Not Available]	[Not Available]	[Not Available]	[Not Available]	[Not Available]	[Not Available]	[Not Available]	[Not Available]	[Not Available]	[Not Available]	[Not Available]	[Not Available]	[Not Available]	[Not Available]	[Not Available]	[Not Applicable]	[Not Available]	35	No	[Not Available]	[Not Available]	[Not Available]	[Not Available]	[Not Available]	[Not Available]	Cervical Squamous Cell Carcinoma	Non-keratinizing squamous cell carcinoma	G2	2010	Biopsy (cervical / CT-guided / Other)	[Not Applicable]
0ACD1E47-1099-469B-A6D4-E00DB47F57A9	TCGA-ZJ-AAXF	1/28/15	NO	YES	Female	[Not Available]	[Not Available]	[Not Available]	[Not Available]	[Not Available]	Alive	[Not Available]	[Not Available]	[Not Available]	[Not Available]	[Not Available]	[Not Available]	No	[Not Available]	[Not Available]	[Not Available]	[Not Available]	[Not Available]	[Not Available]	[Not Available]	[Not Available]	[Not Available]	[Not Available]	[Not Available]	[Not Available]	[Not Available]	[Not Available]	[Not Available]	[Not Applicable]	[Not Available]	62	No	[Not Available]	[Not Available]	[Not Available]	[Not Available]	[Not Available]	[Not Available]	Cervical Squamous Cell Carcinoma	Keratinizing squamous cell carcinoma	G3	2010	Biopsy (cervical / CT-guided / Other)	[Not Applicable]
40A86987-E77F-4977-92B1-8217796E1938	TCGA-ZJ-AAXI	12/31/14	NO	YES	Female	[Not Available]	[Not Available]	[Not Available]	[Not Available]	[Not Available]	Alive	[Not Available]	[Not Available]	[Not Available]	[Not Available]	[Not Available]	[Not Available]	No	[Not Available]	[Not Available]	[Not Available]	[Not Available]	[Not Available]	[Not Available]	[Not Available]	[Not Available]	[Not Available]	[Not Available]	[Not Available]	[Not Available]	[Not Available]	[Not Available]	[Not Available]	[Not Applicable]	[Not Available]	67	No	[Not Available]	[Not Available]	[Not Available]	[Not Available]	[Not Available]	[Not Available]	Cervical Squamous Cell Carcinoma	Non-keratinizing squamous cell carcinoma	G2	2010	Biopsy (cervical / CT-guided / Other)	[Not Applicable]
6B60BF8E-29A1-4C6B-9EAD-AEA4DDC99064	TCGA-ZJ-AAXJ	12/31/14	NO	YES	Female	[Not Available]	[Not Available]	[Not Available]	[Not Available]	[Not Available]	Alive	[Not Available]	[Not Available]	[Not Available]	[Not Available]	[Not Available]	[Not Available]	No	[Not Available]	[Not Available]	[Not Available]	[Not Available]	[Not Available]	[Not Available]	[Not Available]	[Not Available]	[Not Available]	[Not Available]	[Not Available]	[Not Available]	[Not Available]	[Not Available]	[Not Available]	[Not Applicable]	[Not Available]	43	No	[Not Available]	[Not Available]	[Not Available]	[Not Available]	[Not Available]	[Not Available]	Cervical Squamous Cell Carcinoma	Keratinizing squamous cell carcinoma	[Not Available]	2010	Biopsy (cervical / CT-guided / Other)	[Not Applicable]
5F22E050-C172-4F2D-A1F9-6CB749B6EF98	TCGA-ZJ-AAXN	12/31/14	NO	YES	Female	[Not Available]	173	59	WHITE	NOT HISPANIC OR LATINO	Alive	[Not Available]	1	1	[Not Available]	[Not Available]	[Not Available]	No	[Not Available]	[Not Available]	[Not Available]	[Not Available]	[Not Available]	[Not Available]	2	21	[Not Available]	[Not Available]	2.1	[Not Available]	[Not Available]	[Not Available]	[Not Available]	[Not Applicable]	[Not Available]	34	No	[Not Available]	[Not Available]	[Not Available]	[Not Available]	[Not Available]	[Not Available]	Cervical Squamous Cell Carcinoma	Non-keratinizing squamous cell carcinoma	[Not Available]	2010	Biopsy (cervical / CT-guided / Other)	[Not Applicable]
5916AF71-0262-42CF-AF4B-EAC830A8B419	TCGA-ZJ-AAXT	12/31/14	NO	YES	Female	[Not Available]	165	76	WHITE	NOT HISPANIC OR LATINO	Alive	[Not Available]	3	3	[Not Available]	[Not Available]	[Not Available]	No	[Not Available]	[Not Available]	[Not Available]	[Not Available]	[Not Available]	[Not Available]	4	20	1982	[Not Available]	0.2	[Not Available]	[Not Available]	[Not Available]	[Not Available]	[Not Applicable]	[Not Available]	54	No	[Not Available]	[Not Available]	[Not Available]	[Not Available]	[Not Available]	[Not Available]	Cervical Squamous Cell Carcinoma	Non-keratinizing squamous cell carcinoma	G2	2009	Biopsy (cervical / CT-guided / Other)	[Not Applicable]
DDD4B6D2-5BE0-4EDD-977A-A795EEA3C738	TCGA-ZJ-AAXU	12/19/14	NO	YES	Female	[Not Available]	165	70	WHITE	NOT HISPANIC OR LATINO	Alive	[Not Available]	0	[Not Available]	[Not Available]	[Not Available]	[Not Available]	No	[Not Available]	[Not Available]	[Not Available]	[Not Available]	[Not Available]	[Not Available]	2	15	[Not Available]	[Not Available]	52.86	[Not Available]	[Not Available]	[Not Available]	[Not Available]	[Not Applicable]	[Not Available]	51	No	[Not Available]	[Not Available]	[Not Available]	[Not Available]	[Not Available]	[Not Available]	Cervical Squamous Cell Carcinoma	Non-keratinizing squamous cell carcinoma	G2	2010	Biopsy (cervical / CT-guided / Other)	[Not Applicable]
F0DAF315-8909-4CDA-886D-A2770B08DB94	TCGA-ZJ-AB0H	12/19/14	NO	YES	Female	[Not Available]	[Not Available]	[Not Available]	[Not Available]	[Not Available]	Alive	[Not Available]	[Not Available]	[Not Available]	[Not Available]	[Not Available]	[Not Available]	No	[Not Available]	[Not Available]	[Not Available]	[Not Available]	[Not Available]	[Not Available]	[Not Available]	[Not Available]	[Not Available]	[Not Available]	[Not Available]	[Not Available]	[Not Available]	[Not Available]	[Not Available]	[Not Applicable]	[Not Available]	48	No	[Not Available]	[Not Available]	[Not Available]	[Not Available]	[Not Available]	[Not Available]	Cervical Squamous Cell Carcinoma	Non-keratinizing squamous cell carcinoma	[Not Available]	2006	Biopsy (cervical / CT-guided / Other)	[Not Applicable]
A4F13656-A941-498A-9AC9-F020ED559B35	TCGA-ZJ-AB0I	12/19/14	NO	YES	Female	[Not Available]	173	78	WHITE	NOT HISPANIC OR LATINO	Alive	Never Used	4	4	[Not Available]	[Not Available]	[Not Available]	No	[Not Available]	[Not Available]	[Not Available]	[Not Available]	[Not Available]	[Not Available]	4	13	2006	[Not Available]	13	[Not Available]	[Not Available]	[Not Available]	[Not Available]	[Not Applicable]	[Not Available]	25	No	[Not Available]	[Not Available]	[Not Available]	[Not Available]	[Not Available]	[Not Available]	Cervical Squamous Cell Carcinoma	Keratinizing squamous cell carcinoma	[Not Available]	2006	Biopsy (cervical / CT-guided / Other)	[Not Applicable]
4756ACC0-4E96-44D4-B359-04D64DC7EB84	TCGA-ZX-AA5X	11/24/14	YES	NO	Female	Post (prior bilateral ovariectomy OR >12 mo since LMP with no prior hysterectomy)	157	56	WHITE	NOT HISPANIC OR LATINO	Alive	[Not Available]	2	2	[Not Available]	0	[Not Available]	No	0	WITH TUMOR	0	0	[Not Available]	NO	1	[Not Available]	[Not Available]	Other, specify	[Not Available]	Positive for Hepatitis A	1	[Not Available]	Pre-Adjuvant Therapy	[Not Applicable]	[Not Applicable]	64	No	[Not Available]	[Not Available]	[Not Available]	[Not Available]	[Not Available]	[Not Available]	Cervical Squamous Cell Carcinoma	Non-keratinizing squamous cell carcinoma	G2	2013	Biopsy (cervical / CT-guided / Other)	[Not Applicable]
[truncated: 74 more columns]
