# Supplementary material for: An Innovative Immune Score-Based Prognostic Nomogram for Patients with Cervical Cancer
Source: Biomed Res Int. 2020 Nov 7;2020:8882576. doi: 10.1155/2020/8882576 (PMC7669339; doi:10.1155/2020/8882576)
Supplement: Supplementary Materials — Supplementary Table 1: the detailed clinical data for each patient. Supplementary Table 2: the immune scores of each patient based on the ESTIMATE algorithm. Supplementary Table 3: the main clinical characteristics and follow-up information of patients with cervical cancer. Supplementary Table 4: results of univariate Cox regression analyses. Supplementary Table 5: results of multivariate Cox regression analyses. [file 8882576.f1.zip › Supplementary Table 2.txt]

id	Immune_score
TCGA-2W-A8YY	-317.99
TCGA-4J-AA1J	-373.13
TCGA-BI-A0VR	1072.14
TCGA-BI-A0VS	286.23
TCGA-BI-A20A	997.66
TCGA-C5-A0TN	1.68
TCGA-C5-A1BE	4.89
TCGA-C5-A1BF	565.83
TCGA-C5-A1BI	1119.3
TCGA-C5-A1BJ	654.09
TCGA-C5-A1BK	1919.23
TCGA-C5-A1BL	750.93
TCGA-C5-A1BM	1358.64
TCGA-C5-A1BN	-650.81
TCGA-C5-A1BQ	947.53
TCGA-C5-A1M5	740.91
TCGA-C5-A1M6	-938.2
TCGA-C5-A1M7	592.08
TCGA-C5-A1M8	-462.22
TCGA-C5-A1M9	-258.3
TCGA-C5-A1ME	398.24
TCGA-C5-A1MF	774.56
TCGA-C5-A1MH	1487.7
TCGA-C5-A1MI	67.2
TCGA-C5-A1MJ	-5.79
TCGA-C5-A1MK	200.57
TCGA-C5-A1ML	18.13
TCGA-C5-A1MN	-116.79
TCGA-C5-A1MP	1463.49
TCGA-C5-A1MQ	1579.58
TCGA-C5-A2LS	-711.81
TCGA-C5-A2LT	639.91
TCGA-C5-A2LV	799.58
TCGA-C5-A2LX	1823.56
TCGA-C5-A2LY	1811.68
TCGA-C5-A2LZ	464.77
TCGA-C5-A2M1	786.33
TCGA-C5-A2M2	-523.07
TCGA-C5-A3HD	-603.84
TCGA-C5-A3HE	1102.02
TCGA-C5-A3HF	223.87
TCGA-C5-A3HL	-154.48
TCGA-C5-A7CG	2234.92
TCGA-C5-A7CH	-203.37
TCGA-C5-A7CJ	982.59
TCGA-C5-A7CK	-1009.79
TCGA-C5-A7CL	36.07
TCGA-C5-A7CM	-670.58
TCGA-C5-A7CO	70.1
TCGA-C5-A7UC	-602.9
TCGA-C5-A7UE	-76.15
TCGA-C5-A7UH	110.37
TCGA-C5-A7UI	1220.77
TCGA-C5-A7X3	709.79
TCGA-C5-A7X5	-760.59
TCGA-C5-A7X8	188.49
TCGA-C5-A7XC	761.17
TCGA-C5-A8XH	644.11
TCGA-C5-A8XI	420.01
TCGA-C5-A8XJ	-146.47
TCGA-C5-A8XK	29.51
TCGA-C5-A8YQ	4.29
TCGA-C5-A8YR	1051.58
TCGA-C5-A8YT	-317.42
TCGA-C5-A8ZZ	-672.83
TCGA-C5-A901	148.26
TCGA-C5-A902	1054.41
TCGA-C5-A905	-313.27
TCGA-C5-A907	472
TCGA-DG-A2KH	-712.91
TCGA-DG-A2KJ	1431.35
TCGA-DG-A2KK	136.77
TCGA-DG-A2KL	533.05
TCGA-DG-A2KM	3295.3
TCGA-DR-A0ZL	-369.81
TCGA-DR-A0ZM	1474.12
TCGA-DS-A0VK	-467.26
TCGA-DS-A0VL	421.27
TCGA-DS-A0VM	275.77
TCGA-DS-A0VN	1738.23
TCGA-DS-A1O9	1235.46
TCGA-DS-A1OA	893.89
TCGA-DS-A1OB	240.77
TCGA-DS-A1OC	567.91
TCGA-DS-A1OD	1959.29
TCGA-DS-A3LQ	52.97
TCGA-DS-A5RQ	619.35
TCGA-DS-A7WF	-415.17
TCGA-DS-A7WH	-354.94
TCGA-DS-A7WI	374.32
TCGA-EA-A1QS	141.82
TCGA-EA-A1QT	-56.53
TCGA-EA-A3HQ	906.86
TCGA-EA-A3HR	-220.75
TCGA-EA-A3HS	227.86
TCGA-EA-A3HT	403.66
TCGA-EA-A3HU	1927.26
TCGA-EA-A3QD	2291.2
TCGA-EA-A3QE	1681.67
TCGA-EA-A3Y4	1829.82
TCGA-EA-A410	-361.49
TCGA-EA-A411	108.83
TCGA-EA-A439	-388.75
TCGA-EA-A43B	997.44
TCGA-EA-A44S	604.73
TCGA-EA-A4BA	-1336.18
TCGA-EA-A50E	303.53
TCGA-EA-A556	-978.48
TCGA-EA-A5FO	-833.21
TCGA-EA-A5O9	223.55
TCGA-EA-A5ZD	917.05
TCGA-EA-A5ZE	1020.91
TCGA-EA-A5ZF	-831.48
TCGA-EA-A6QX	584.97
TCGA-EA-A78R	535.4
TCGA-EA-A97N	-199.19
TCGA-EK-A2GZ	-4.56
TCGA-EK-A2H0	69.62
TCGA-EK-A2H1	990.9
TCGA-EK-A2IP	-20.12
TCGA-EK-A2IR	-1356.39
TCGA-EK-A2PG	-417.67
TCGA-EK-A2PI	-770.69
TCGA-EK-A2PK	1554.9
TCGA-EK-A2PL	-68.25
TCGA-EK-A2PM	-1485.7
TCGA-EK-A2R7	355.32
TCGA-EK-A2R8	-34.74
TCGA-EK-A2R9	783.87
TCGA-EK-A2RA	1124.97
TCGA-EK-A2RB	51.18
TCGA-EK-A2RC	970.36
TCGA-EK-A2RE	-662.56
TCGA-EK-A2RJ	1021.35
TCGA-EK-A2RK	684.31
TCGA-EK-A2RL	-651.28
TCGA-EK-A2RM	-433.02
TCGA-EK-A2RN	1007.65
TCGA-EK-A2RO	-167.77
TCGA-EK-A3GJ	1121.63
TCGA-EK-A3GK	9.61
TCGA-EK-A3GM	-549.76
TCGA-EK-A3GN	-863.63
TCGA-EX-A1H5	-419.16
TCGA-EX-A1H6	-464.93
TCGA-EX-A3L1	593.01
TCGA-EX-A449	-583.35
TCGA-EX-A69L	1673.59
TCGA-EX-A69M	1155.32
TCGA-EX-A8YF	908.4
TCGA-FU-A23K	921.65
TCGA-FU-A23L	995.75
TCGA-FU-A2QG	-8.26
TCGA-FU-A3EO	305.91
TCGA-FU-A3HY	-575.44
TCGA-FU-A3HZ	-472.77
TCGA-FU-A3NI	79.64
TCGA-FU-A3TQ	390.51
TCGA-FU-A3TX	330.79
TCGA-FU-A3WB	-587.04
TCGA-FU-A3YQ	1299.46
TCGA-FU-A40J	257.46
TCGA-FU-A57G	-573.87
TCGA-FU-A5XV	-34.78
TCGA-FU-A770	-177.31
TCGA-GH-A9DA	504.42
TCGA-HG-A2PA	301.3
TCGA-HM-A3JJ	610.74
TCGA-HM-A3JK	560.24
TCGA-HM-A4S6	1119.15
TCGA-HM-A6W2	-1212.71
TCGA-HM-A6W2	-275.29
TCGA-IR-A3L7	-865.74
TCGA-IR-A3LA	-247.07
TCGA-IR-A3LB	-139.68
TCGA-IR-A3LC	140.4
TCGA-IR-A3LF	-0.07
TCGA-IR-A3LH	2249.21
TCGA-IR-A3LI	-732.59
TCGA-IR-A3LK	506.07
TCGA-IR-A3LL	1824.7
TCGA-JW-A5VG	642.09
TCGA-JW-A5VH	-1434.35
TCGA-JW-A5VI	448.26
TCGA-JW-A5VJ	-159.99
TCGA-JW-A5VK	-552.07
TCGA-JW-A5VL	1044.4
TCGA-JW-A69B	246.57
TCGA-JW-A852	246.99
TCGA-JW-AAVH	-422.62
TCGA-JX-A3PZ	1000.74
TCGA-JX-A3Q0	918.68
TCGA-JX-A3Q8	402.29
TCGA-JX-A5QV	401.17
TCGA-LP-A4AU	267.33
TCGA-LP-A4AV	1354.14
TCGA-LP-A4AW	-191.83
TCGA-LP-A4AX	1471.42
TCGA-LP-A5U2	-228.17
TCGA-LP-A5U3	489.92
TCGA-LP-A7HU	606.3
TCGA-MA-AA3W	1800.25
TCGA-MA-AA3X	900.24
TCGA-MA-AA3Y	1274.81
TCGA-MA-AA3Z	711.59
TCGA-MA-AA41	61.14
TCGA-MA-AA42	2651.87
TCGA-MA-AA43	-268.53
TCGA-MU-A51Y	1435.19
TCGA-MU-A5YI	410.04
TCGA-MU-A8JM	547.59
TCGA-MY-A5BD	-582.83
TCGA-MY-A5BE	3002.07
TCGA-MY-A5BF	847.99
TCGA-MY-A913	550.82
TCGA-PN-A8MA	41.35
TCGA-Q1-A5R1	-197.06
TCGA-Q1-A5R2	999.15
TCGA-Q1-A5R3	689.36
TCGA-Q1-A6DT	-375.58
TCGA-Q1-A6DV	-435.35
TCGA-Q1-A6DW	23.55
TCGA-Q1-A73O	495.99
TCGA-Q1-A73P	231.42
TCGA-Q1-A73Q	-527.03
TCGA-Q1-A73R	-732.66
TCGA-Q1-A73S	-1038.39
TCGA-R2-A69V	2825.15
TCGA-RA-A741	1027.72
TCGA-UC-A7PD	-99.43
TCGA-UC-A7PF	1420.43
TCGA-UC-A7PG	1003.99
TCGA-UC-A7PG	-244.68
TCGA-UC-A7PI	-514.89
TCGA-VS-A8EB	372.05
TCGA-VS-A8EC	-1529.91
TCGA-VS-A8EG	-221.07
TCGA-VS-A8EH	-405.97
TCGA-VS-A8EI	663.64
TCGA-VS-A8EJ	-241.6
TCGA-VS-A8EK	-54.59
TCGA-VS-A8EL	1610.41
TCGA-VS-A8Q8	991.86
TCGA-VS-A8Q9	-148.44
TCGA-VS-A8QA	-91.03
TCGA-VS-A8QC	-92.79
TCGA-VS-A8QF	581.76
TCGA-VS-A8QH	-521.78
TCGA-VS-A8QM	1685.8
TCGA-VS-A94W	1356.47
TCGA-VS-A94X	-26.12
TCGA-VS-A94Y	188.05
TCGA-VS-A94Z	1900.48
TCGA-VS-A950	-135.41
TCGA-VS-A952	-487.8
TCGA-VS-A953	30.24
TCGA-VS-A954	-86.51
TCGA-VS-A957	-483.76
TCGA-VS-A958	1872.28
TCGA-VS-A959	572.52
TCGA-VS-A9U5	555.39
TCGA-VS-A9U6	459.65
TCGA-VS-A9U7	992.56
TCGA-VS-A9UB	1772.84
TCGA-VS-A9UC	608.45
TCGA-VS-A9UD	1998.04
TCGA-VS-A9UH	1967.06
TCGA-VS-A9UI	688.03
TCGA-VS-A9UJ	-1362.79
TCGA-VS-A9UL	-1645.63
TCGA-VS-A9UM	821.17
TCGA-VS-A9UO	-366.6
TCGA-VS-A9UP	-1556.77
TCGA-VS-A9UQ	-484.1
TCGA-VS-A9UR	-567.35
TCGA-VS-A9UT	2086.32
TCGA-VS-A9UU	-340.02
TCGA-VS-A9UV	-259.79
TCGA-VS-A9UY	411.84
TCGA-VS-A9UZ	-30.82
TCGA-VS-A9V0	-1007.2
TCGA-VS-A9V1	-109.84
TCGA-VS-A9V2	916.97
TCGA-VS-A9V3	655.03
TCGA-VS-A9V4	-641.97
TCGA-VS-A9V5	-623.29
TCGA-VS-AA62	1553.28
TCGA-WL-A834	-546.46
TCGA-XS-A8TJ	367.43
TCGA-ZJ-A8QO	1037.1
TCGA-ZJ-A8QQ	26.65
TCGA-ZJ-A8QR	76.9
TCGA-ZJ-AAX4	1194.43
TCGA-ZJ-AAX8	894.13
TCGA-ZJ-AAXA	-450.39
TCGA-ZJ-AAXB	-777.77
TCGA-ZJ-AAXD	-292.21
TCGA-ZJ-AAXF	1072.62
TCGA-ZJ-AAXI	-45.29
TCGA-ZJ-AAXJ	117.37
TCGA-ZJ-AAXN	587.69
TCGA-ZJ-AAXT	107.77
TCGA-ZJ-AAXU	972.84
TCGA-ZJ-AB0H	1240.11
TCGA-ZJ-AB0I	186.79
TCGA-ZX-AA5X	960.31
