# Supplementary material for: An Innovative Immune Score-Based Prognostic Nomogram for Patients with Cervical Cancer
Source: Biomed Res Int. 2020 Nov 7;2020:8882576. doi: 10.1155/2020/8882576 (PMC7669339; doi:10.1155/2020/8882576)
Supplement: Supplementary Materials — Supplementary Table 1: the detailed clinical data for each patient. Supplementary Table 2: the immune scores of each patient based on the ESTIMATE algorithm. Supplementary Table 3: the main clinical characteristics and follow-up information of patients with cervical cancer. Supplementary Table 4: results of univariate Cox regression analyses. Supplementary Table 5: results of multivariate Cox regression analyses. [file 8882576.f1.zip › Supplementary Table 3.txt]

id	time	status	age	grade	stage	histology	race	Immune_score
TCGA-2W-A8YY	17.51	0	2	2	0	1	1	-317.99
TCGA-4J-AA1J	17.81	0	0	2	0	0	1	-373.13
TCGA-BI-A0VR	49.44	0	2	2	2	0	1	1072.14
TCGA-BI-A0VS	57	0	1	2	0	0	1	286.23
TCGA-BI-A20A	23.65	0	1	2	0	0	1	997.66
TCGA-C5-A0TN	11.43	1	0	2	0	0	2	1.68
TCGA-C5-A1BE	68.79	1	3	1	0	0	1	4.89
TCGA-C5-A1BK	176.91	0	0	1	0	0	2	1919.23
TCGA-C5-A1BM	82.79	1	4	1	0	0	2	1358.64
TCGA-C5-A1M5	67.41	1	2	1	0	0	1	740.91
TCGA-C5-A1M7	46.29	0	0	1	0	0	1	592.08
TCGA-C5-A1M8	30.19	0	1	1	0	0	1	-462.22
TCGA-C5-A1M9	34.99	1	1	2	0	2	1	-258.3
TCGA-C5-A1ME	57.69	0	0	0	0	2	1	398.24
TCGA-C5-A1MF	53.12	0	1	1	0	0	1	774.56
TCGA-C5-A1MI	35.58	1	1	1	0	0	1	67.2
TCGA-C5-A1MJ	0.46	1	3	1	0	2	1	-5.79
TCGA-C5-A1MP	3.58	0	0	2	0	0	2	1463.49
TCGA-C5-A1MQ	33.87	0	0	1	1	0	1	1579.58
TCGA-C5-A2LS	44.19	0	0	0	0	3	1	-711.81
TCGA-C5-A2LT	73.13	0	0	2	0	0	1	639.91
TCGA-C5-A2LV	73.39	0	0	2	0	0	2	799.58
TCGA-C5-A2LX	82.98	0	2	1	0	0	1	1823.56
TCGA-C5-A2LY	78.29	0	0	1	0	0	1	1811.68
TCGA-C5-A2M1	38.4	0	0	1	0	2	1	786.33
TCGA-C5-A3HE	18	0	1	2	0	0	1	1102.02
TCGA-C5-A3HL	20.4	0	4	1	0	0	1	-154.48
TCGA-C5-A7CG	210.51	0	2	1	0	0	1	2234.92
TCGA-C5-A7CJ	101.74	1	1	1	1	0	1	982.59
TCGA-C5-A7UC	17.18	1	1	2	0	0	1	-602.9
TCGA-C5-A7UI	94.88	1	1	2	0	0	2	1220.77
TCGA-C5-A7X8	2.73	0	0	1	0	5	1	188.49
TCGA-C5-A7XC	50.95	0	0	1	0	0	1	761.17
TCGA-C5-A8XI	8.34	0	3	2	0	0	2	420.01
TCGA-C5-A8YR	27.5	1	2	2	0	0	1	1051.58
TCGA-C5-A905	160.28	0	0	1	0	0	2	-313.27
TCGA-DR-A0ZL	87.68	0	2	2	0	0	0	-369.81
TCGA-DR-A0ZM	58.84	0	3	1	2	0	1	1474.12
TCGA-DS-A0VK	36.73	1	1	2	0	0	1	-467.26
TCGA-DS-A0VL	55.58	1	0	1	0	0	1	421.27
TCGA-DS-A0VM	117.9	0	2	2	0	0	1	275.77
TCGA-DS-A0VN	118.56	0	1	1	0	0	1	1738.23
TCGA-DS-A1O9	8.74	1	4	2	3	0	1	1235.46
TCGA-DS-A1OA	28.88	1	4	2	0	0	0	893.89
TCGA-DS-A1OB	28.29	1	1	1	0	0	1	240.77
TCGA-DS-A1OC	12.35	0	1	1	0	0	1	567.91
TCGA-DS-A1OD	127.27	0	1	2	0	0	1	1959.29
TCGA-DS-A5RQ	16.82	0	4	1	0	0	1	619.35
TCGA-DS-A7WH	17.51	0	0	1	0	5	1	-354.94
TCGA-DS-A7WI	8.28	1	1	1	1	0	1	374.32
TCGA-EA-A1QS	39.52	0	1	1	0	0	1	141.82
TCGA-EA-A1QT	40.83	0	1	1	0	0	1	-56.53
TCGA-EA-A3HQ	37.32	0	2	1	1	0	1	906.86
TCGA-EA-A3HR	30.88	0	2	1	1	0	1	-220.75
TCGA-EA-A3HS	31.5	0	0	0	0	0	1	227.86
TCGA-EA-A3HT	31.34	0	3	0	0	0	1	403.66
TCGA-EA-A3HU	33.28	0	1	1	1	0	1	1927.26
TCGA-EA-A3QD	13.04	0	2	2	2	0	1	2291.2
TCGA-EA-A3QE	25	0	1	1	0	0	1	1681.67
TCGA-EA-A3Y4	36.86	0	0	2	0	0	1	1829.82
TCGA-EA-A410	26.38	0	2	1	1	0	1	-361.49
TCGA-EA-A411	24.54	0	1	1	0	0	1	108.83
TCGA-EA-A439	31.7	0	1	2	1	0	0	-388.75
TCGA-EA-A43B	25.99	0	1	1	0	0	1	997.44
TCGA-EA-A44S	12.12	0	0	1	2	0	1	604.73
TCGA-EA-A4BA	24.8	0	1	1	0	2	1	-1336.18
TCGA-EA-A50E	7.46	1	1	1	3	0	0	303.53
TCGA-EA-A556	14.88	0	0	2	0	4	1	-978.48
TCGA-EA-A5FO	26.77	0	2	1	0	0	1	-833.21
TCGA-EA-A5O9	25.89	0	0	1	0	0	1	223.55
TCGA-EA-A5ZD	27.27	0	0	1	0	0	0	917.05
TCGA-EA-A5ZE	27.23	0	2	2	0	0	0	1020.91
TCGA-EA-A5ZF	27.2	0	2	1	0	0	0	-831.48
TCGA-EA-A6QX	23.98	0	1	2	2	0	0	584.97
TCGA-EA-A78R	13.47	0	2	1	0	0	0	535.4
TCGA-EA-A97N	0.36	0	0	1	0	0	1	-199.19
TCGA-EK-A2IP	6.64	0	0	2	0	0	1	-20.12
TCGA-EK-A2IR	113.07	0	1	2	0	0	1	-1356.39
TCGA-EK-A2R7	0.89	0	1	2	0	0	1	355.32
TCGA-EK-A2R8	1.45	0	1	2	0	0	1	-34.74
TCGA-EK-A2R9	0.13	0	2	2	0	0	1	783.87
TCGA-EK-A2RE	1.87	0	0	1	1	0	1	-662.56
TCGA-EK-A2RJ	1.74	0	2	2	0	0	1	1021.35
TCGA-EK-A2RK	0.43	0	3	2	0	0	1	684.31
TCGA-EK-A2RL	47.73	1	0	1	0	2	2	-651.28
TCGA-EK-A2RN	2.33	0	1	1	0	0	1	1007.65
TCGA-EK-A3GJ	0.1	0	2	2	0	0	2	1121.63
TCGA-EK-A3GK	0.49	0	0	2	0	2	1	9.61
TCGA-EX-A1H5	20.34	0	2	2	1	0	2	-419.16
TCGA-EX-A1H6	7.92	0	0	0	0	2	1	-464.93
TCGA-EX-A3L1	15.21	0	0	2	1	0	1	593.01
TCGA-EX-A449	14.68	0	1	0	3	2	1	-583.35
TCGA-EX-A69L	19.78	0	1	2	0	0	0	1673.59
TCGA-EX-A69M	8.31	1	3	2	0	0	1	1155.32
TCGA-EX-A8YF	15.54	0	1	2	0	0	1	908.4
TCGA-FU-A23K	12.22	0	0	2	2	0	1	921.65
TCGA-FU-A23L	23.82	0	2	2	1	0	1	995.75
TCGA-FU-A2QG	19.02	0	0	1	0	0	1	-8.26
TCGA-FU-A3EO	16.1	0	2	1	1	2	1	305.91
TCGA-FU-A3HY	31.34	0	1	1	0	0	1	-575.44
TCGA-FU-A3HZ	36.24	0	3	2	1	0	1	-472.77
TCGA-FU-A3NI	20.96	1	1	1	0	0	1	79.64
TCGA-FU-A3TQ	26.12	0	2	1	2	0	1	390.51
TCGA-FU-A3WB	16.13	0	1	1	1	0	1	-587.04
TCGA-FU-A3YQ	28.29	0	0	0	0	0	1	1299.46
TCGA-FU-A40J	13.99	0	0	2	2	2	1	257.46
TCGA-FU-A57G	35.41	0	1	1	0	2	1	-573.87
TCGA-FU-A5XV	10.55	0	0	2	2	0	1	-34.78
TCGA-FU-A770	1.12	0	0	1	2	3	1	-177.31
TCGA-GH-A9DA	17.74	0	0	2	0	0	1	504.42
TCGA-HG-A2PA	25.39	1	0	1	0	0	1	301.3
TCGA-HM-A3JJ	21.65	1	0	2	0	0	2	610.74
TCGA-HM-A3JK	20.76	0	3	2	1	0	1	560.24
TCGA-HM-A4S6	14.91	0	2	2	2	0	1	1119.15
TCGA-HM-A6W2	9.43	0	0	2	3	1	2	-275.29
TCGA-HM-A6W2	9.43	0	0	2	3	1	2	-1212.71
TCGA-IR-A3L7	147.27	0	0	2	0	0	1	-865.74
TCGA-IR-A3LA	137.06	0	2	2	0	4	1	-247.07
TCGA-IR-A3LB	66.75	1	2	2	0	2	1	-139.68
TCGA-IR-A3LC	129.27	0	0	2	0	0	1	140.4
TCGA-IR-A3LF	96.88	0	3	1	0	3	1	-0.07
TCGA-IR-A3LH	78.65	0	1	3	1	0	2	2249.21
TCGA-IR-A3LI	81.9	0	1	1	3	2	1	-732.59
TCGA-IR-A3LK	29.83	1	3	2	0	0	1	506.07
TCGA-IR-A3LL	36.33	0	2	1	0	0	1	1824.7
TCGA-JW-A5VG	27.4	0	0	2	1	0	2	642.09
TCGA-JW-A5VH	3.29	1	2	1	3	0	2	-1434.35
TCGA-JW-A5VI	24.54	0	1	2	1	0	2	448.26
TCGA-JW-A5VJ	21.42	0	2	2	1	0	2	-159.99
TCGA-JW-A5VK	20.47	0	1	2	0	0	2	-552.07
TCGA-JW-A5VL	15.57	0	0	0	0	0	2	1044.4
TCGA-JW-A852	8.28	1	1	1	1	0	1	246.99
TCGA-JW-AAVH	18.13	0	1	1	0	0	1	-422.62
TCGA-JX-A3PZ	21.09	1	0	1	0	0	1	1000.74
TCGA-JX-A3Q0	209.43	0	3	1	2	0	2	918.68
TCGA-JX-A3Q8	44.58	0	0	2	0	2	0	402.29
TCGA-JX-A5QV	20.89	0	0	2	0	0	1	401.17
TCGA-LP-A4AU	11.27	0	0	2	2	0	0	267.33
TCGA-LP-A4AV	0	0	3	1	0	0	0	1354.14
TCGA-LP-A4AW	0.89	0	2	0	0	0	0	-191.83
TCGA-LP-A4AX	12.48	0	1	2	0	0	0	1471.42
TCGA-LP-A5U2	0.3	0	0	2	2	3	0	-228.17
TCGA-LP-A5U3	0.82	0	0	2	0	0	0	489.92
TCGA-LP-A7HU	13.34	0	2	2	1	2	0	606.3
TCGA-MA-AA3W	22.5	0	2	2	0	0	1	1800.25
TCGA-MA-AA3X	20.27	0	1	1	2	0	2	900.24
TCGA-MA-AA3Y	17.81	0	1	2	0	0	1	1274.81
TCGA-MA-AA41	9.17	0	0	1	1	0	1	61.14
TCGA-MA-AA42	8.51	0	4	2	1	0	1	2651.87
TCGA-MA-AA43	11.37	0	1	2	2	0	1	-268.53
TCGA-MU-A51Y	28.06	0	0	1	1	0	1	1435.19
TCGA-MU-A5YI	34.59	0	2	1	0	0	2	410.04
TCGA-MU-A8JM	19.94	0	1	1	0	0	1	547.59
TCGA-MY-A5BD	54.76	0	3	0	1	0	1	-582.83
TCGA-MY-A5BE	35.02	0	1	2	0	0	2	3002.07
TCGA-MY-A5BF	20.83	0	3	0	1	0	1	847.99
TCGA-MY-A913	17.21	0	0	2	1	0	2	550.82
TCGA-PN-A8MA	2.96	0	1	2	1	0	2	41.35
TCGA-Q1-A5R1	15.57	0	0	1	0	5	1	-197.06
TCGA-Q1-A6DV	16.13	0	0	1	0	5	0	-435.35
TCGA-Q1-A73P	15.87	0	1	0	0	2	1	231.42
TCGA-Q1-A73S	22.6	0	0	1	0	1	1	-1038.39
TCGA-R2-A69V	19.58	0	1	2	0	0	1	2825.15
TCGA-UC-A7PD	11.66	1	0	1	0	0	2	-99.43
TCGA-UC-A7PG	12.16	1	1	0	2	0	1	-244.68
TCGA-UC-A7PG	12.16	1	1	0	2	0	1	1003.99
TCGA-UC-A7PI	69.45	0	1	0	0	4	1	-514.89
TCGA-VS-A8EC	46.48	0	2	1	2	0	1	-1529.91
TCGA-VS-A8EJ	19.94	1	2	2	1	0	1	-241.6
TCGA-VS-A8EK	27.23	1	3	1	3	0	1	-54.59
TCGA-VS-A8EL	65.44	0	0	2	1	0	2	1610.41
TCGA-VS-A8Q8	32.13	1	0	1	0	0	1	991.86
TCGA-VS-A94W	40.83	0	0	1	1	0	1	1356.47
TCGA-VS-A94X	16.62	1	0	1	1	0	2	-26.12
TCGA-VS-A94Z	33.34	0	0	1	1	0	1	1900.48
TCGA-VS-A952	58.41	0	3	1	0	5	1	-487.8
TCGA-VS-A957	55.45	0	3	2	0	0	1	-483.76
TCGA-VS-A958	50.1	0	1	1	1	0	1	1872.28
TCGA-VS-A9U5	50.43	0	2	2	1	0	1	555.39
TCGA-VS-A9U7	48.36	0	0	2	0	0	1	992.56
TCGA-VS-A9UD	24.28	0	4	1	2	0	1	1998.04
TCGA-VS-A9UL	14.52	1	4	2	2	0	1	-1645.63
TCGA-VS-A9UM	27.23	1	0	1	3	0	2	821.17
TCGA-VS-A9UO	47.83	0	1	1	1	5	1	-366.6
TCGA-VS-A9UT	15.83	0	4	2	0	5	0	2086.32
TCGA-VS-A9UZ	67.15	0	3	1	0	5	1	-30.82
TCGA-VS-A9V1	5.16	1	1	1	3	5	1	-109.84
TCGA-VS-A9V2	18.23	0	0	1	0	0	1	916.97
TCGA-VS-A9V3	17.74	0	3	2	3	0	1	655.03
TCGA-VS-A9V4	4.34	1	3	1	3	5	1	-641.97
TCGA-VS-A9V5	16.23	1	1	1	1	5	1	-623.29
TCGA-VS-AA62	15.41	1	2	1	1	0	1	1553.28
TCGA-XS-A8TJ	29.24	0	1	1	0	0	2	367.43
TCGA-ZJ-AAX4	0.69	0	5	2	1	0	1	1194.43
TCGA-ZJ-AAXA	1.41	0	3	1	0	0	1	-450.39
TCGA-ZJ-AAXB	0	0	1	2	0	3	1	-777.77
TCGA-ZJ-AAXT	0	0	2	1	2	0	1	107.77
TCGA-ZJ-AAXU	0.16	0	2	1	1	0	1	972.84
