# Supplementary material for: An Innovative Immune Score-Based Prognostic Nomogram for Patients with Cervical Cancer
Source: Biomed Res Int. 2020 Nov 7;2020:8882576. doi: 10.1155/2020/8882576 (PMC7669339; doi:10.1155/2020/8882576)
Supplement: Supplementary Materials — Supplementary Table 1: the detailed clinical data for each patient. Supplementary Table 2: the immune scores of each patient based on the ESTIMATE algorithm. Supplementary Table 3: the main clinical characteristics and follow-up information of patients with cervical cancer. Supplementary Table 4: results of univariate Cox regression analyses. Supplementary Table 5: results of multivariate Cox regression analyses. [file 8882576.f1.zip › Supplementary Table 4.txt]

Call:
coxph(formula = fmla1, data = TCGA)

  n= 198, number of events= 41 

                      coef exp(coef) se(coef)      z Pr(>|z|)  
Immune_scoreMedium -0.2071    0.8129   0.3555 -0.583   0.5601  
Immune_scoreHigh   -1.0210    0.3602   0.4926 -2.073   0.0382 *
---
Signif. codes:  0 ¡®***¡¯ 0.001 ¡®**¡¯ 0.01 ¡®*¡¯ 0.05 ¡®.¡¯ 0.1 ¡® ¡¯ 1

                   exp(coef) exp(-coef) lower .95 upper .95
Immune_scoreMedium    0.8129      1.230    0.4050     1.632
Immune_scoreHigh      0.3602      2.776    0.1372     0.946

Concordance= 0.612  (se = 0.045 )
Likelihood ratio test= 5.28  on 2 df,   p=0.07
Wald test            = 4.31  on 2 df,   p=0.1
Score (logrank) test = 4.63  on 2 df,   p=0.1

Call:
coxph(formula = fmla1, data = TCGA)

  n= 198, number of events= 41 

               coef  exp(coef)   se(coef)      z Pr(>|z|)  
age41-50  4.129e-01  1.511e+00  4.085e-01  1.011   0.3121  
age51-60 -8.212e-02  9.212e-01  5.170e-01 -0.159   0.8738  
age60-70  4.389e-01  1.551e+00  5.176e-01  0.848   0.3964  
age71-80  1.303e+00  3.680e+00  5.957e-01  2.187   0.0288 *
age>80   -1.091e+01  1.831e-05  3.702e+03 -0.003   0.9976  
---
Signif. codes:  0 ¡®***¡¯ 0.001 ¡®**¡¯ 0.01 ¡®*¡¯ 0.05 ¡®.¡¯ 0.1 ¡® ¡¯ 1

         exp(coef) exp(-coef) lower .95 upper .95
age41-50 1.511e+00  6.617e-01    0.6786     3.365
age51-60 9.212e-01  1.086e+00    0.3344     2.538
age60-70 1.551e+00  6.447e-01    0.5624     4.278
age71-80 3.680e+00  2.718e-01    1.1448    11.828
age>80   1.831e-05  5.460e+04    0.0000       Inf

Concordance= 0.602  (se = 0.049 )
Likelihood ratio test= 5.18  on 5 df,   p=0.4
Wald test            = 6  on 5 df,   p=0.3
Score (logrank) test = 6.57  on 5 df,   p=0.3

Call:
coxph(formula = fmla1, data = TCGA)

  n= 198, number of events= 41 

                 coef exp(coef) se(coef)     z Pr(>|z|)    
stageStage II  0.1393    1.1494   0.4341 0.321    0.748    
stageStage III 0.1856    1.2040   0.6155 0.302    0.763    
stageStage IV  1.9378    6.9437   0.4412 4.392 1.12e-05 ***
---
Signif. codes:  0 ¡®***¡¯ 0.001 ¡®**¡¯ 0.01 ¡®*¡¯ 0.05 ¡®.¡¯ 0.1 ¡® ¡¯ 1

               exp(coef) exp(-coef) lower .95 upper .95
stageStage II      1.149     0.8700    0.4909     2.691
stageStage III     1.204     0.8306    0.3604     4.023
stageStage IV      6.944     0.1440    2.9243    16.488

Concordance= 0.648  (se = 0.049 )
Likelihood ratio test= 13.55  on 3 df,   p=0.004
Wald test            = 19.97  on 3 df,   p=2e-04
Score (logrank) test = 26.54  on 3 df,   p=7e-06

Call:
coxph(formula = fmla1, data = TCGA)

  n= 198, number of events= 41 

                     coef  exp(coef)   se(coef)      z Pr(>|z|)
gradeGrade II   4.768e-01  1.611e+00  7.367e-01  0.647    0.517
gradeGrade III  1.815e-01  1.199e+00  7.585e-01  0.239    0.811
gradeGrade IV  -1.570e+01  1.515e-07  4.341e+03 -0.004    0.997

               exp(coef) exp(-coef) lower .95 upper .95
gradeGrade II  1.611e+00  6.208e-01    0.3802     6.826
gradeGrade III 1.199e+00  8.340e-01    0.2711     5.302
gradeGrade IV  1.515e-07  6.600e+06    0.0000       Inf

Concordance= 0.545  (se = 0.046 )
Likelihood ratio test= 2.05  on 3 df,   p=0.6
Wald test            = 1.04  on 3 df,   p=0.8
Score (logrank) test = 1.56  on 3 df,   p=0.7

Call:
coxph(formula = fmla1, data = TCGA)

  n= 198, number of events= 41 

                                                             coef  exp(coef)   se(coef)      z Pr(>|z|)
histologyAdenosquamous                                 -1.705e+01  3.941e-08  8.240e+03 -0.002    0.998
histologyEndocervical Type of Adenocarcinoma            1.658e-01  1.180e+00  5.326e-01  0.311    0.756
histologyEndocervical Adenocarcinoma of the Usual Type -1.710e+01  3.758e-08  5.256e+03 -0.003    0.997
histologyEndometrioid Adenocarcinoma of Endocervix     -1.710e+01  3.729e-08  4.507e+03 -0.004    0.997
histologyMucinous Adenocarcinoma of Endocervical Type   6.047e-01  1.831e+00  6.078e-01  0.995    0.320

                                                       exp(coef) exp(-coef) lower .95 upper .95
histologyAdenosquamous                                 3.941e-08  2.537e+07    0.0000       Inf
histologyEndocervical Type of Adenocarcinoma           1.180e+00  8.473e-01    0.4156     3.352
histologyEndocervical Adenocarcinoma of the Usual Type 3.758e-08  2.661e+07    0.0000       Inf
histologyEndometrioid Adenocarcinoma of Endocervix     3.729e-08  2.681e+07    0.0000       Inf
histologyMucinous Adenocarcinoma of Endocervical Type  1.831e+00  5.462e-01    0.5563     6.025

Concordance= 0.552  (se = 0.037 )
Likelihood ratio test= 6.24  on 5 df,   p=0.3
Wald test            = 1.03  on 5 df,   p=1
Score (logrank) test = 3.89  on 5 df,   p=0.6

Call:
coxph(formula = fmla1, data = TCGA)

  n= 198, number of events= 41 

             coef exp(coef) se(coef)     z Pr(>|z|)
raceWhite  0.2583    1.2947   0.7331 0.352    0.725
raceOthers 0.4730    1.6049   0.7868 0.601    0.548

           exp(coef) exp(-coef) lower .95 upper .95
raceWhite      1.295     0.7724    0.3077     5.448
raceOthers     1.605     0.6231    0.3433     7.502

Concordance= 0.526  (se = 0.04 )
Likelihood ratio test= 0.49  on 2 df,   p=0.8
Wald test            = 0.49  on 2 df,   p=0.8
Score (logrank) test = 0.5  on 2 df,   p=0.8
Call:
coxph(formula = fmla1, data = TCGA)

  n= 198, number of events= 41 

                                                  coef exp(coef) se(coef)      z Pr(>|z|)
histologyCervical non-squamous cell carcinoma -0.09847   0.90623  0.41644 -0.236    0.813

                                              exp(coef) exp(-coef) lower .95 upper .95
histologyCervical non-squamous cell carcinoma    0.9062      1.103    0.4006      2.05

Concordance= 0.499  (se = 0.037 )
Likelihood ratio test= 0.06  on 1 df,   p=0.8
Wald test            = 0.06  on 1 df,   p=0.8
Score (logrank) test = 0.06  on 1 df,   p=0.8

> 
