# Supplementary material for: An Innovative Immune Score-Based Prognostic Nomogram for Patients with Cervical Cancer
Source: Biomed Res Int. 2020 Nov 7;2020:8882576. doi: 10.1155/2020/8882576 (PMC7669339; doi:10.1155/2020/8882576)
Supplement: Supplementary Materials — Supplementary Table 1: the detailed clinical data for each patient. Supplementary Table 2: the immune scores of each patient based on the ESTIMATE algorithm. Supplementary Table 3: the main clinical characteristics and follow-up information of patients with cervical cancer. Supplementary Table 4: results of univariate Cox regression analyses. Supplementary Table 5: results of multivariate Cox regression analyses. [file 8882576.f1.zip › Supplementary Table 5.txt]

Call:
coxph(formula = fmla1, data = TCGA)

  n= 198, number of events= 41 

                         coef  exp(coef)   se(coef)      z Pr(>|z|)    
age41-50            2.507e-01  1.285e+00  4.336e-01  0.578 0.563051    
age51-60           -7.111e-02  9.314e-01  5.340e-01 -0.133 0.894055    
age60-70            7.621e-02  1.079e+00  5.389e-01  0.141 0.887539    
age71-80            1.744e+00  5.722e+00  6.294e-01  2.771 0.005588 ** 
age>80             -9.665e+00  6.347e-05  3.189e+03 -0.003 0.997582    
stageStage II       3.492e-01  1.418e+00  4.530e-01  0.771 0.440844    
stageStage III      2.221e-01  1.249e+00  6.384e-01  0.348 0.727889    
stageStage IV       1.775e+00  5.898e+00  4.580e-01  3.875 0.000107 ***
Immune_scoreMedium -1.461e-01  8.640e-01  3.777e-01 -0.387 0.698803    
Immune_scoreHigh   -1.186e+00  3.055e-01  5.331e-01 -2.225 0.026113 *  
---
Signif. codes:  0 ¡®***¡¯ 0.001 ¡®**¡¯ 0.01 ¡®*¡¯ 0.05 ¡®.¡¯ 0.1 ¡® ¡¯ 1

                   exp(coef) exp(-coef) lower .95 upper .95
age41-50           1.285e+00  7.782e-01    0.5493    3.0058
age51-60           9.314e-01  1.074e+00    0.3270    2.6525
age60-70           1.079e+00  9.266e-01    0.3753    3.1031
age71-80           5.722e+00  1.748e-01    1.6662   19.6472
age>80             6.347e-05  1.575e+04    0.0000       Inf
stageStage II      1.418e+00  7.053e-01    0.5835    3.4453
stageStage III     1.249e+00  8.008e-01    0.3573    4.3636
stageStage IV      5.898e+00  1.695e-01    2.4039   14.4726
Immune_scoreMedium 8.640e-01  1.157e+00    0.4122    1.8113
Immune_scoreHigh   3.055e-01  3.274e+00    0.1075    0.8685

Concordance= 0.72  (se = 0.05 )
Likelihood ratio test= 23.81  on 10 df,   p=0.008
Wald test            = 28.14  on 10 df,   p=0.002
Score (logrank) test = 36.62  on 10 df,   p=7e-05
